# Supplementary material for: A crowdsourced set of curated structural variants for the human genome
Source: PLoS Comput Biol. 2020 Jun 19;16(6):e1007933. doi: 10.1371/journal.pcbi.1007933 (PMC7329145; doi:10.1371/journal.pcbi.1007933)
Supplement: S1 Data — (XLSX) [file pcbi.1007933.s008.xlsx]

## Sheet: SVCurator_Final_Labels
ID	chr	size	del_ins	start	end	variant	GT_Th1	count_max_concor_Th1	count_total_responses_Th1	frac_max_concor_Th1	perc_max_concor_Th1	Thr1_max_count_bin	Thr1_perc_agree_bin	GT_all	count_max_concor_all	count_total_responses_all	frac_max_concor_all	perc_max_concor_all	Threshold	GTall	GT_Th2	count_max_concor_Th2	count_total_responses_Th2	frac_max_concor_Th2	perc_max_concor_Th2	GT_Compare	img	v0.6	Thr2_max_count_bin	Thr2_perc_agree_bin	Thr1_Thr2_compare	v06_Thr1Thr2_agree	SVCurator_v0.6Calls	varname	VariantType	size_bin	Crowdsourced Label
HG4_Ill_150bpfermikitraw_23751	21	52	Deletion	47489070	47489122	1146	Hom_Ref	3	5	0.6	60	2018-03-04	50-60	Hom_Ref	5	8	0.625	62.5	Threshold2	Hom_Ref	Hom_Ref	5	8	0.625	62.5	concordant	HG4_Ill_150bpfermikitraw_23751.jpeg	omitted_region	5+	60-70	concordant	discordant	Omitted_Call	DEL 21:47489070-47489122	DEL	50-100	Hom_Ref
HG3_PB_pbsv_18742	21	66	Deletion	21145540	21145606	1135	Hom_Var	4	4	1	100	2018-03-04	90-100	Hom_Var	6	10	0.6	60	Threshold2	Hom_Var	Hom_Var	5	8	0.625	62.5	concordant	HG3_PB_pbsv_18742.jpeg	omitted_region	5+	60-70	concordant	discordant	Omitted_Call	DEL 21:21145540-21145606	DEL	50-100	Hom_Var
HG3_Ill_MetaSV_3995	4	501	Deletion	184474304	184474805	6	Another_Var	12	15	0.8	80	5+	70-80	Another_Var	18	36	0.5	50	Threshold2	Another_Var	Another_Var	15	24	0.625	62.5	concordant	HG3_Ill_MetaSV_3995.jpeg	omitted_region	5+	60-70	concordant	discordant	Omitted_Call	DEL 4:184474304-184474805	DEL	400-1000	Another_Var
HG2_Ill_MetaSV_402	1	490	Deletion	244439071	244439561	810	Another_Var	5	6	0.833333	83.3333	5+	80-90	Another_Var	5	10	0.5	50	Threshold2	Another_Var	Another_Var	5	8	0.625	62.5	concordant	HG2_Ill_MetaSV_402.jpeg	omitted_region	5+	60-70	concordant	discordant	Omitted_Call	DEL 1:244439071-244439561	DEL	400-1000	Another_Var
HG4_10X_allpass_3333	20	354	Deletion	25583193	25583547	598	Another_Var	4	6	0.666667	66.6667	2018-03-04	60-70	Another_Var	5	9	0.555556	55.5556	Threshold2	Another_Var	Another_Var	5	8	0.625	62.5	concordant	HG4_10X_allpass_3333.jpeg	Hom_Ref	5+	60-70	concordant	discordant	v0.6_Call	DEL 20:25583193-25583547	DEL	300-400	Another_Var
HG4_PB_HySA_27463	21	186	Deletion	33850009	33850195	1149	Another_Var	5	6	0.833333	83.3333	5+	80-90	Another_Var	5	9	0.555556	55.5556	Threshold2	Another_Var	Another_Var	5	8	0.625	62.5	concordant	HG4_PB_HySA_27463.jpeg	omitted_region	5+	60-70	concordant	discordant	Omitted_Call	DEL 21:33850009-33850195	DEL	100-300	Another_Var
HG2_Ill_Krunchall_11741	7	53	Deletion	78953844	78953897	978	Another_Var	6	7	0.857143	85.7143	5+	80-90	Another_Var	7	12	0.583333	58.3333	Threshold2	Another_Var	Another_Var	7	11	0.636364	63.6364	concordant	HG2_Ill_Krunchall_11741.jpeg	omitted_region	5+	60-70	concordant	discordant	Omitted_Call	DEL 7:78953844-78953897	DEL	50-100	Another_Var
HG3_Ill_SVrefine2DISCOVARDovetail_11764	17	797	Deletion	4094515	4095312	1067	Another_Var	6	7	0.857143	85.7143	5+	80-90	Another_Var	7	12	0.583333	58.3333	Threshold2	Another_Var	Another_Var	7	11	0.636364	63.6364	concordant	HG3_Ill_SVrefine2DISCOVARDovetail_11764.jpeg	omitted_region	5+	60-70	concordant	discordant	Omitted_Call	DEL 17:4094515-4095312	DEL	400-1000	Another_Var
HG2_PB_pbsv_545	1	355	Deletion	70027324	70027679	1057	Complex_Var	6	8	0.75	75	5+	70-80	Complex_Var	8	13	0.615385	61.5385	Threshold2	Complex_Var	Complex_Var	7	11	0.636364	63.6364	concordant	HG2_PB_pbsv_545.jpeg	Het_Var	5+	60-70	concordant	discordant	v0.6_Call	DEL 1:70027324-70027679	DEL	300-400	Complex_Var
HG4_Ill_Krunchall_21903	16	1542	Deletion	32532031	32533573	842	Het_Var	4	7	0.571429	57.1429	2018-03-04	50-60	Het_Var	7	13	0.538462	53.8462	Threshold2	Het_Var	Het_Var	7	11	0.636364	63.6364	concordant	HG4_Ill_Krunchall_21903.jpeg	omitted_region	5+	60-70	concordant	discordant	Omitted_Call	DEL 16:32532031-32533573	DEL	1000-5999	Het_Var
HG2_Ill_SpiralSDKrefine_1341	1	182	Deletion	245836571	245836753	416	Another_Var	5	8	0.625	62.5	5+	60-70	Another_Var	7	12	0.583333	58.3333	Threshold2	Another_Var	Another_Var	7	11	0.636364	63.6364	concordant	HG2_Ill_SpiralSDKrefine_1341.jpeg	omitted_region	5+	60-70	concordant	discordant	Omitted_Call	DEL 1:245836571-245836753	DEL	100-300	Another_Var
HG2_Ill_breakscan11_752	4	8862	Deletion	190191600	190200462	891	Het_Var	6	9	0.666667	66.6667	5+	60-70	Het_Var	8	12	0.666667	66.6667	Threshold2	Het_Var	Het_Var	8	12	0.666667	66.6667	concordant	HG2_Ill_breakscan11_752.jpeg	omitted_region	5+	60-70	concordant	discordant	Omitted_Call	DEL 4:190191600-190200462	DEL	6000+	Het_Var
HG4_Ill_SVrefine2DISCOVARDovetail_10099	13	96	Deletion	86063125	86063221	406	Another_Var	6	8	0.75	75	5+	70-80	Another_Var	7	10	0.7	70	Threshold2	Another_Var	Another_Var	6	9	0.666667	66.6667	concordant	HG4_Ill_SVrefine2DISCOVARDovetail_10099.jpeg	omitted_region	5+	60-70	concordant	discordant	Omitted_Call	DEL 13:86063125-86063221	DEL	50-100	Another_Var
HG2_Ill_250bpfermikitraw_25651	23	95	Deletion	793752	793847	115	Het_Var	2	2	1	100	2018-01-02	90-100	Het_Var	4	7	0.571429	57.1429	Threshold2	Het_Var	Het_Var	4	6	0.666667	66.6667	concordant	HG2_Ill_250bpfermikitraw_25651.jpeg	omitted_region	2018-03-04	60-70	concordant	discordant	Omitted_Call	DEL X:793752-793847	DEL	50-100	Het_Var
HG2_PB_SVrefine2PBcRplusDovetail_4133	16	92	Deletion	89226749	89226841	209	Hom_Var	7	9	0.777778	77.7778	5+	70-80	Hom_Var	9	14	0.642857	64.2857	Threshold2	Hom_Var	Hom_Var	8	12	0.666667	66.6667	concordant	HG2_PB_SVrefine2PBcRplusDovetail_4133.jpeg	omitted_region	5+	60-70	concordant	discordant	Omitted_Call	DEL 16:89226749-89226841	DEL	50-100	Hom_Var
HG4_PB_SVrefine2Falcon1Dovetail_7667	11	98	Deletion	90004352	90004450	334	Hom_Var	5	6	0.833333	83.3333	5+	80-90	Hom_Var	8	12	0.666667	66.6667	Threshold2	Hom_Var	Hom_Var	6	9	0.666667	66.6667	concordant	HG4_PB_SVrefine2Falcon1Dovetail_7667.jpeg	omitted_region	5+	60-70	concordant	discordant	Omitted_Call	DEL 11:90004352-90004450	DEL	50-100	Hom_Var
HG4_PB_assemblyticsfalcon_16580	22	641	Deletion	47030958	47031599	879	Another_Var	4	6	0.666667	66.6667	2018-03-04	60-70	Another_Var	7	11	0.636364	63.6364	Threshold2	Another_Var	Another_Var	6	9	0.666667	66.6667	concordant	HG4_PB_assemblyticsfalcon_16580.jpeg	omitted_region	5+	60-70	concordant	discordant	Omitted_Call	DEL 22:47030958-47031599	DEL	400-1000	Another_Var
HG3_PB_assemblyticsfalcon_21498	5	667	Deletion	79896001	79896668	931	Another_Var	5	7	0.714286	71.4286	5+	70-80	Another_Var	9	14	0.642857	64.2857	Threshold2	Another_Var	Another_Var	8	12	0.666667	66.6667	concordant	HG3_PB_assemblyticsfalcon_21498.jpeg	omitted_region	5+	60-70	concordant	discordant	Omitted_Call	DEL 5:79896001-79896668	DEL	400-1000	Another_Var
HG2_PB_SVrefine2Falcon2Bionano_7244	13	515	Deletion	113421094	113421609	834	Het_Var	4	6	0.666667	66.6667	2018-03-04	60-70	Het_Var	7	10	0.7	70	Threshold2	Het_Var	Het_Var	6	9	0.666667	66.6667	concordant	HG2_PB_SVrefine2Falcon2Bionano_7244.jpeg	omitted_region	5+	60-70	concordant	discordant	Omitted_Call	DEL 13:113421094-113421609	DEL	400-1000	Het_Var
HG4_Ill_GATKHCSBGrefine_12865	21	28	Deletion	34949910	34949938	658	Het_Var	4	6	0.666667	66.6667	2018-03-04	60-70	Het_Var	6	10	0.6	60	Threshold2	Het_Var	Het_Var	6	9	0.666667	66.6667	concordant	HG4_Ill_GATKHCSBGrefine_12865.jpeg	omitted_region	5+	60-70	concordant	discordant	Omitted_Call	DEL 21:34949910-34949938	DEL	20-50	Het_Var
HG4_PB_SVrefine2Falcon1Dovetail_7768	11	3053	Deletion	119951836	119954889	1094	Another_Var	5	7	0.714286	71.4286	5+	70-80	Another_Var	7	12	0.583333	58.3333	Threshold2	Another_Var	Another_Var	6	9	0.666667	66.6667	concordant	HG4_PB_SVrefine2Falcon1Dovetail_7768.jpeg	omitted_region	5+	60-70	concordant	discordant	Omitted_Call	DEL 11:119951836-119954889	DEL	1000-5999	Another_Var
HG3_PB_SVrefine2PBcRDovetail_6892	13	141	Deletion	114743721	114743862	1019	Het_Var	5	9	0.555556	55.5556	5+	50-60	Het_Var	9	14	0.642857	64.2857	Threshold2	Het_Var	Het_Var	8	12	0.666667	66.6667	concordant	HG3_PB_SVrefine2PBcRDovetail_6892.jpeg	omitted_region	5+	60-70	concordant	discordant	Omitted_Call	DEL 13:114743721-114743862	DEL	100-300	Het_Var
HG2_PB_SVrefine2PB10Xhap12_7142	8	112	Deletion	136847436	136847548	1245	Hom_Var	3	4	0.75	75	2018-03-04	70-80	Hom_Var	6	11	0.545455	54.5455	Threshold2	Hom_Var	Hom_Var	6	9	0.666667	66.6667	concordant	HG2_PB_SVrefine2PB10Xhap12_7142.jpeg	omitted_region	5+	60-70	concordant	discordant	Omitted_Call	DEL 8:136847436-136847548	DEL	100-300	Hom_Var
HG3_PB_pbsv_2039	2	72	Deletion	87411639	87411711	108	Another_Var	5	5	1	100	5+	90-100	Another_Var	7	11	0.636364	63.6364	Threshold2	Another_Var	Another_Var	7	10	0.7	70	concordant	HG3_PB_pbsv_2039.jpeg	omitted_region	5+	60-70	concordant	discordant	Omitted_Call	DEL 2:87411639-87411711	DEL	50-100	Another_Var
HG2_PB_assemblyticsfalcon_426	1	647	Deletion	30243370	30244017	538	Another_Var	5	8	0.625	62.5	5+	60-70	Another_Var	7	12	0.583333	58.3333	Threshold2	Another_Var	Another_Var	7	10	0.7	70	concordant	HG2_PB_assemblyticsfalcon_426.jpeg	omitted_region	5+	60-70	concordant	discordant	Omitted_Call	DEL 1:30243370-30244017	DEL	400-1000	Another_Var
HG3_Ill_manta_3651	17	190	Deletion	13161260	13161450	808	Het_Var	5	8	0.625	62.5	5+	60-70	Het_Var	8	12	0.666667	66.6667	Threshold2	Het_Var	Het_Var	7	10	0.7	70	concordant	HG3_Ill_manta_3651.jpeg	omitted_region	5+	60-70	concordant	discordant	Omitted_Call	DEL 17:13161260-13161450	DEL	100-300	Het_Var
HG3_Ill_Krunchall_19376	14	154	Deletion	23173131	23173285	1234	Hom_Var	5	7	0.714286	71.4286	5+	70-80	Hom_Var	7	10	0.7	70	Threshold2	Hom_Var	Hom_Var	7	10	0.7	70	concordant	HG3_Ill_Krunchall_19376.jpeg	omitted_region	5+	60-70	concordant	discordant	Omitted_Call	DEL 14:23173131-23173285	DEL	100-300	Hom_Var
HG4_PB_SVrefine2Falcon1Dovetail_3740	5	5538	Deletion	135115146	135120684	367	Het_Var	4	5	0.8	80	2018-03-04	70-80	Het_Var	5	8	0.625	62.5	Threshold2	Het_Var	Het_Var	5	7	0.714286	71.4286	concordant	HG4_PB_SVrefine2Falcon1Dovetail_3740.jpeg	omitted_region	5+	70-80	concordant	discordant	Omitted_Call	DEL 5:135115146-135120684	DEL	1000-5999	Het_Var
HG2_PB_HySA_9922	4	41	Deletion	188426525	188426566	923	Het_Var	5	6	0.833333	83.3333	5+	80-90	Het_Var	8	12	0.666667	66.6667	Threshold2	Het_Var	Het_Var	8	11	0.727273	72.7273	concordant	HG2_PB_HySA_9922.jpeg	Hom_Var	5+	70-80	concordant	discordant	v0.6_Call	DEL 4:188426525-188426566	DEL	20-50	Het_Var
HG2_Ill_MetaSV_3865	5	195990	Deletion	682492	878482	779	Hom_Ref	2	2	1	100	2018-01-02	90-100	Hom_Ref	3	4	0.75	75	Threshold2	Hom_Ref	Hom_Ref	3	4	0.75	75	concordant	HG2_Ill_MetaSV_3865.jpeg	omitted_region	2018-03-04	70-80	concordant	discordant	Omitted_Call	DEL 5:682492-878482	DEL	6000+	Hom_Ref
HG3_PB_SVrefine2PBcRDovetail_8076	17	13532	Deletion	34597846	34611378	951	Hom_Ref	2	2	1	100	2018-01-02	90-100	Hom_Ref	4	7	0.571429	57.1429	Threshold2	Hom_Ref	Hom_Ref	3	4	0.75	75	concordant	HG3_PB_SVrefine2PBcRDovetail_8076.jpeg	omitted_region	2018-03-04	70-80	concordant	discordant	Omitted_Call	DEL 17:34597846-34611378	DEL	6000+	Hom_Ref
HG2_Ill_breakscan11_2839	23	450	Deletion	282617	283067	72	Hom_Ref	2	2	1	100	2018-01-02	90-100	Hom_Ref	4	6	0.666667	66.6667	Threshold2	Hom_Ref	Hom_Ref	3	4	0.75	75	concordant	HG2_Ill_breakscan11_2839.jpeg	omitted_region	2018-03-04	70-80	concordant	discordant	Omitted_Call	DEL X:282617-283067	DEL	400-1000	Hom_Ref
HG4_Ill_GATKHCSBGrefine_10854	16	326	Deletion	16501032	16501358	1112	Hom_Var	3	3	1	100	2018-03-04	90-100	Hom_Var	7	9	0.777778	77.7778	Threshold2	Hom_Var	Hom_Var	6	8	0.75	75	concordant	HG4_Ill_GATKHCSBGrefine_10854.jpeg	omitted_region	5+	70-80	concordant	discordant	Omitted_Call	DEL 16:16501032-16501358	DEL	300-400	Hom_Var
HG2_PB_SVrefine2Falcon1plusDovetail_4553	17	1608	Deletion	103455	105063	68	Het_Var	1	2	0.5	50	2018-01-02	40-50	Het_Var	3	5	0.6	60	Threshold2	Het_Var	Het_Var	3	4	0.75	75	concordant	HG2_PB_SVrefine2Falcon1plusDovetail_4553.jpeg	omitted_region	2018-03-04	70-80	concordant	discordant	Omitted_Call	DEL 17:103455-105063	DEL	1000-5999	Het_Var
HG3_PB_pbsv_1346	1	115	Deletion	245606040	245606155	955	Another_Var	5	6	0.833333	83.3333	5+	80-90	Another_Var	6	9	0.666667	66.6667	Threshold2	Another_Var	Another_Var	6	8	0.75	75	concordant	HG3_PB_pbsv_1346.jpeg	omitted_region	5+	70-80	concordant	discordant	Omitted_Call	DEL 1:245606040-245606155	DEL	100-300	Another_Var
HG3_PB_pbsv_19798	23	127	Deletion	32470401	32470528	409	Hom_Ref	5	5	1	100	5+	90-100	Hom_Ref	7	11	0.636364	63.6364	Threshold2	Hom_Ref	Hom_Ref	6	8	0.75	75	concordant	HG3_PB_pbsv_19798.jpeg	omitted_region	5+	70-80	concordant	discordant	Omitted_Call	DEL X:32470401-32470528	DEL	100-300	Hom_Ref
HG4_PB_HySA_28428	23	105	Deletion	1528231	1528336	1120	Hom_Ref	2	2	1	100	2018-01-02	90-100	Hom_Ref	4	6	0.666667	66.6667	Threshold2	Hom_Ref	Hom_Ref	3	4	0.75	75	concordant	HG4_PB_HySA_28428.jpeg	omitted_region	2018-03-04	70-80	concordant	discordant	Omitted_Call	DEL X:1528231-1528336	DEL	100-300	Hom_Ref
HG4_PB_HySA_27193	20	185	Deletion	62003567	62003752	1159	Hom_Var	6	8	0.75	75	5+	70-80	Hom_Var	10	14	0.714286	71.4286	Threshold2	Hom_Var	Hom_Var	10	13	0.769231	76.9231	concordant	HG4_PB_HySA_27193.jpeg	omitted_region	5+	70-80	concordant	discordant	Omitted_Call	DEL 20:62003567-62003752	DEL	100-300	Hom_Var
HG4_PB_SVrefine2PBcRDovetail_7625	15	10973	Deletion	45224267	45235240	67	Hom_Ref	4	6	0.666667	66.6667	2018-03-04	60-70	Hom_Ref	7	9	0.777778	77.7778	Threshold2	Hom_Ref	Hom_Ref	7	9	0.777778	77.7778	concordant	HG4_PB_SVrefine2PBcRDovetail_7625.jpeg	omitted_region	5+	70-80	concordant	discordant	Omitted_Call	DEL 15:45224267-45235240	DEL	6000+	Hom_Ref
HG2_PB_SVrefine2PB10Xhap12_9364	12	15439	Deletion	10567693	10583132	925	Hom_Ref	5	6	0.833333	83.3333	5+	80-90	Hom_Ref	8	12	0.666667	66.6667	Threshold2	Hom_Ref	Hom_Ref	7	9	0.777778	77.7778	concordant	HG2_PB_SVrefine2PB10Xhap12_9364.jpeg	omitted_region	5+	70-80	concordant	discordant	Omitted_Call	DEL 12:10567693-10583132	DEL	6000+	Hom_Ref
HG3_PB_pbsv_14426	14	752	Deletion	38569474	38570226	697	Another_Var	6	7	0.857143	85.7143	5+	80-90	Another_Var	7	11	0.636364	63.6364	Threshold2	Another_Var	Another_Var	7	9	0.777778	77.7778	concordant	HG3_PB_pbsv_14426.jpeg	omitted_region	5+	70-80	concordant	discordant	Omitted_Call	DEL 14:38569474-38570226	DEL	400-1000	Another_Var
HG2_PB_SVrefine2Falcon1plusDovetail_4556	17	1682	Deletion	136688	138370	1158	Hom_Var	5	5	1	100	5+	90-100	Hom_Var	8	10	0.8	80	Threshold2	Hom_Var	Hom_Var	7	9	0.777778	77.7778	concordant	HG2_PB_SVrefine2Falcon1plusDovetail_4556.jpeg	omitted_region	5+	70-80	concordant	discordant	Omitted_Call	DEL 17:136688-138370	DEL	1000-5999	Hom_Var
HG4_PB_SVrefine2PBcRDovetail_7794	15	6574	Deletion	100416661	100423235	967	Hom_Ref	5	6	0.833333	83.3333	5+	80-90	Hom_Ref	8	11	0.727273	72.7273	Threshold2	Hom_Ref	Hom_Ref	8	10	0.8	80	concordant	HG4_PB_SVrefine2PBcRDovetail_7794.jpeg	omitted_region	5+	70-80	concordant	discordant	Omitted_Call	DEL 15:100416661-100423235	DEL	6000+	Hom_Ref
HG3_PB_HySA_22631	14	20	Deletion	89545421	89545441	888	Het_Var	4	5	0.8	80	2018-03-04	70-80	Het_Var	8	10	0.8	80	Threshold2	Het_Var	Het_Var	8	10	0.8	80	concordant	HG3_PB_HySA_22631.jpeg	omitted_region	5+	70-80	concordant	discordant	Omitted_Call	DEL 14:89545421-89545441	DEL	20-50	Het_Var
HG2_PB_SVrefine2PBcRplusDovetail_165	1	1765	Deletion	17071397	17073162	639	Het_Var	5	7	0.714286	71.4286	5+	70-80	Het_Var	8	11	0.727273	72.7273	Threshold2	Het_Var	Het_Var	8	10	0.8	80	concordant	HG2_PB_SVrefine2PBcRplusDovetail_165.jpeg	omitted_region	5+	70-80	concordant	discordant	Omitted_Call	DEL 1:17071397-17073162	DEL	1000-5999	Het_Var
HG3_PB_assemblyticsfalcon_28525	23	3884	Deletion	1757491	1761375	622	Hom_Ref	2	2	1	100	2018-01-02	90-100	Hom_Ref	4	5	0.8	80	Threshold2	Hom_Ref	Hom_Ref	4	5	0.8	80	concordant	HG3_PB_assemblyticsfalcon_28525.jpeg	omitted_region	2018-03-04	70-80	concordant	discordant	Omitted_Call	DEL X:1757491-1761375	DEL	1000-5999	Hom_Ref
HG4_PB_pbsv_12725	11	138	Deletion	123766733	123766871	1251	Het_Var	7	8	0.875	87.5	5+	80-90	Het_Var	8	12	0.666667	66.6667	Threshold2	Het_Var	Het_Var	8	10	0.8	80	concordant	HG4_PB_pbsv_12725.jpeg	omitted_region	5+	70-80	concordant	discordant	Omitted_Call	DEL 11:123766733-123766871	DEL	100-300	Het_Var
HG2_10X_SVrefine210Xhap12_731	1	22123	Deletion	169222618	169244741	7	Het_Var	10	10	1	100	5+	90-100	Het_Var	15	23	0.652174	65.2174	Threshold2	Het_Var	Het_Var	13	16	0.8125	81.25	concordant	HG2_10X_SVrefine210Xhap12_731.jpeg	omitted_region	5+	80-90	concordant	discordant	Omitted_Call	DEL 1:169222618-169244741	DEL	6000+	Het_Var
HG3_PB_SVrefine2Falcon1Dovetail_2913	4	6033	Deletion	93855280	93861313	513	Hom_Var	6	7	0.857143	85.7143	5+	80-90	Hom_Var	12	15	0.8	80	Threshold2	Hom_Var	Hom_Var	9	11	0.818182	81.8182	concordant	HG3_PB_SVrefine2Falcon1Dovetail_2913.jpeg	omitted_region	5+	80-90	concordant	discordant	Omitted_Call	DEL 4:93855280-93861313	DEL	6000+	Hom_Var
HG4_Ill_GATKHC_24895	15	89	Deletion	100349143	100349232	599	Hom_Ref	6	7	0.857143	85.7143	5+	80-90	Hom_Ref	10	13	0.769231	76.9231	Threshold2	Hom_Ref	Hom_Ref	9	11	0.818182	81.8182	concordant	HG4_Ill_GATKHC_24895.jpeg	omitted_region	5+	80-90	concordant	discordant	Omitted_Call	DEL 15:100349143-100349232	DEL	50-100	Hom_Ref
HG3_Ill_FB_830	1	25	Deletion	169324184	169324209	304	Hom_Ref	5	7	0.714286	71.4286	5+	70-80	Hom_Ref	9	11	0.818182	81.8182	Threshold2	Hom_Ref	Hom_Ref	9	11	0.818182	81.8182	concordant	HG3_Ill_FB_830.jpeg	omitted_region	5+	80-90	concordant	discordant	Omitted_Call	DEL 1:169324184-169324209	DEL	20-50	Hom_Ref
HG4_Ill_MetaSV_3061	21	3272	Deletion	10600298	10603570	1249	Hom_Ref	7	8	0.875	87.5	5+	80-90	Hom_Ref	9	11	0.818182	81.8182	Threshold2	Hom_Ref	Hom_Ref	9	11	0.818182	81.8182	concordant	HG4_Ill_MetaSV_3061.jpeg	omitted_region	5+	80-90	concordant	discordant	Omitted_Call	DEL 21:10600298-10603570	DEL	1000-5999	Hom_Ref
HG2_Ill_SpiralSDKrefine_6812	17	118	Deletion	46979221	46979339	1261	Another_Var	8	9	0.888889	88.8889	5+	80-90	Another_Var	9	13	0.692308	69.2308	Threshold2	Another_Var	Another_Var	9	11	0.818182	81.8182	concordant	HG2_Ill_SpiralSDKrefine_6812.jpeg	Hom_Ref	5+	80-90	concordant	discordant	v0.6_Call	DEL 17:46979221-46979339	DEL	100-300	Another_Var
HG2_10X_SVrefine210Xhap12_9259	12	10705	Deletion	59935797	59946502	625	Het_Var	7	8	0.875	87.5	5+	80-90	Het_Var	10	12	0.833333	83.3333	Threshold2	Het_Var	Het_Var	10	12	0.833333	83.3333	concordant	HG2_10X_SVrefine210Xhap12_9259.jpeg	omitted_region	5+	80-90	concordant	discordant	Omitted_Call	DEL 12:59935797-59946502	DEL	6000+	Het_Var
HG2_Ill_MetaSV_4662	7	24891	Deletion	38292560	38317451	70	Hom_Ref	7	8	0.875	87.5	5+	80-90	Hom_Ref	11	14	0.785714	78.5714	Threshold2	Hom_Ref	Hom_Ref	10	12	0.833333	83.3333	concordant	HG2_Ill_MetaSV_4662.jpeg	omitted_region	5+	80-90	concordant	discordant	Omitted_Call	DEL 7:38292560-38317451	DEL	6000+	Hom_Ref
HG4_Ill_MetaSV_5856	23	48419	Deletion	49162081	49210500	563	Hom_Ref	3	3	1	100	2018-03-04	90-100	Hom_Ref	6	7	0.857143	85.7143	Threshold2	Hom_Ref	Hom_Ref	5	6	0.833333	83.3333	concordant	HG4_Ill_MetaSV_5856.jpeg	omitted_region	5+	80-90	concordant	discordant	Omitted_Call	DEL X:49162081-49210500	DEL	6000+	Hom_Ref
HG3_PB_SVrefine2Falcon1Dovetail_9243	15	3820	Deletion	23671669	23675489	954	Hom_Var	3	4	0.75	75	2018-03-04	70-80	Hom_Var	5	7	0.714286	71.4286	Threshold2	Hom_Var	Hom_Var	5	6	0.833333	83.3333	concordant	HG3_PB_SVrefine2Falcon1Dovetail_9243.jpeg	omitted_region	5+	80-90	concordant	discordant	Omitted_Call	DEL 15:23671669-23675489	DEL	1000-5999	Hom_Var
HG2_PB_SVrefine2Falcon1plusDovetail_9335	5	112	Deletion	1080342	1080454	895	Hom_Var	7	8	0.875	87.5	5+	80-90	Hom_Var	10	12	0.833333	83.3333	Threshold2	Hom_Var	Hom_Var	10	12	0.833333	83.3333	concordant	HG2_PB_SVrefine2Falcon1plusDovetail_9335.jpeg	omitted_region	5+	80-90	concordant	discordant	Omitted_Call	DEL 5:1080342-1080454	DEL	100-300	Hom_Var
HG2_Ill_MetaSV_4713	7	8767	Deletion	61848902	61857669	25	Het_Var	10	11	0.909091	90.9091	5+	90-100	Het_Var	19	25	0.76	76	Threshold2	Het_Var	Het_Var	16	19	0.842105	84.2105	concordant	HG2_Ill_MetaSV_4713.jpeg	omitted_region	5+	80-90	concordant	discordant	Omitted_Call	DEL 7:61848902-61857669	DEL	6000+	Het_Var
HG2_PB_pbsv_12347	11	6875	Deletion	54885731	54892606	205	Het_Var	4	4	1	100	2018-03-04	90-100	Het_Var	6	9	0.666667	66.6667	Threshold2	Het_Var	Het_Var	6	7	0.857143	85.7143	concordant	HG2_PB_pbsv_12347.jpeg	omitted_region	5+	80-90	concordant	discordant	Omitted_Call	DEL 11:54885731-54892606	DEL	6000+	Het_Var
HG2_PB_SVrefine2Falcon2Bionano_147	1	32196	Deletion	152555543	152587739	792	Het_Var	4	4	1	100	2018-03-04	90-100	Het_Var	6	7	0.857143	85.7143	Threshold2	Het_Var	Het_Var	6	7	0.857143	85.7143	concordant	HG2_PB_SVrefine2Falcon2Bionano_147.jpeg	omitted_region	5+	80-90	concordant	discordant	Omitted_Call	DEL 1:152555543-152587739	DEL	6000+	Het_Var
HG4_Ill_MetaSV_2645	2	48774	Deletion	89277893	89326667	75	Hom_Ref	4	4	1	100	2018-03-04	90-100	Hom_Ref	7	8	0.875	87.5	Threshold2	Hom_Ref	Hom_Ref	6	7	0.857143	85.7143	concordant	HG4_Ill_MetaSV_2645.jpeg	omitted_region	5+	80-90	concordant	discordant	Omitted_Call	DEL 2:89277893-89326667	DEL	6000+	Hom_Ref
HG4_PB_SVrefine2PBcRDovetail_9546	21	55881	Deletion	10472501	10528382	800	Hom_Ref	2	2	1	100	2018-01-02	90-100	Hom_Ref	7	8	0.875	87.5	Threshold2	Hom_Ref	Hom_Ref	6	7	0.857143	85.7143	concordant	HG4_PB_SVrefine2PBcRDovetail_9546.jpeg	omitted_region	5+	80-90	concordant	discordant	Omitted_Call	DEL 21:10472501-10528382	DEL	6000+	Hom_Ref
HG2_PB_SVrefine2Falcon2Bionano_6381	12	32361	Deletion	8558485	8590846	514	Hom_Var	3	4	0.75	75	2018-03-04	70-80	Hom_Var	6	7	0.857143	85.7143	Threshold2	Hom_Var	Hom_Var	6	7	0.857143	85.7143	concordant	HG2_PB_SVrefine2Falcon2Bionano_6381.jpeg	omitted_region	5+	80-90	concordant	discordant	Omitted_Call	DEL 12:8558485-8590846	DEL	6000+	Hom_Var
HG3_PB_HySA_1247	1	308	Deletion	149397475	149397783	91	Hom_Ref	3	3	1	100	2018-03-04	90-100	Hom_Ref	6	8	0.75	75	Threshold2	Hom_Ref	Hom_Ref	6	7	0.857143	85.7143	concordant	HG3_PB_HySA_1247.jpeg	omitted_region	5+	80-90	concordant	discordant	Omitted_Call	DEL 1:149397475-149397783	DEL	300-400	Hom_Ref
HG3_Ill_manta_1896	7	203	Deletion	44082644	44082847	1017	Hom_Ref	4	5	0.8	80	2018-03-04	70-80	Hom_Ref	7	10	0.7	70	Threshold2	Hom_Ref	Hom_Ref	6	7	0.857143	85.7143	concordant	HG3_Ill_manta_1896.jpeg	omitted_region	5+	80-90	concordant	discordant	Omitted_Call	DEL 7:44082644-44082847	DEL	100-300	Hom_Ref
HG4_Ill_Krunchall_1067	1	10369	Deletion	144896299	144906668	1070	Het_Var	5	6	0.833333	83.3333	5+	80-90	Het_Var	7	9	0.777778	77.7778	Threshold2	Het_Var	Het_Var	7	8	0.875	87.5	concordant	HG4_Ill_Krunchall_1067.jpeg	omitted_region	5+	80-90	concordant	discordant	Omitted_Call	DEL 1:144896299-144906668	DEL	6000+	Het_Var
HG3_Ill_MetaSV_214	1	6497	Deletion	145294900	145301397	617	Hom_Ref	3	4	0.75	75	2018-03-04	70-80	Hom_Ref	7	9	0.777778	77.7778	Threshold2	Hom_Ref	Hom_Ref	7	8	0.875	87.5	concordant	HG3_Ill_MetaSV_214.jpeg	omitted_region	5+	80-90	concordant	discordant	Omitted_Call	DEL 1:145294900-145301397	DEL	6000+	Hom_Ref
HG3_Ill_250bpfermikitraw_19249	14	23	Deletion	70891196	70891219	231	Another_Var	6	6	1	100	5+	90-100	Another_Var	8	9	0.888889	88.8889	Threshold2	Another_Var	Another_Var	7	8	0.875	87.5	concordant	HG3_Ill_250bpfermikitraw_19249.jpeg	omitted_region	5+	80-90	concordant	discordant	Omitted_Call	DEL 14:70891196-70891219	DEL	20-50	Another_Var
HG3_PB_HySA_8215	4	8863	Deletion	190191601	190200464	624	Het_Var	5	6	0.833333	83.3333	5+	80-90	Het_Var	8	9	0.888889	88.8889	Threshold2	Het_Var	Het_Var	8	9	0.888889	88.8889	concordant	HG3_PB_HySA_8215.jpeg	omitted_region	5+	80-90	concordant	discordant	Omitted_Call	DEL 4:190191601-190200464	DEL	6000+	Het_Var
HG4_Ill_GATKHCSBGrefine_8818	11	54	Deletion	131743427	131743481	1051	Hom_Ref	7	7	1	100	5+	90-100	Hom_Ref	8	9	0.888889	88.8889	Threshold2	Hom_Ref	Hom_Ref	8	9	0.888889	88.8889	concordant	HG4_Ill_GATKHCSBGrefine_8818.jpeg	omitted_region	5+	80-90	concordant	discordant	Omitted_Call	DEL 11:131743427-131743481	DEL	50-100	Hom_Ref
HG3_Ill_MetaSV_3020	20	682	Deletion	26259012	26259694	24	Hom_Ref	10	12	0.833333	83.3333	5+	80-90	Hom_Ref	19	24	0.791667	79.1667	Threshold2	Hom_Ref	Hom_Ref	16	18	0.888889	88.8889	concordant	HG3_Ill_MetaSV_3020.jpeg	omitted_region	5+	80-90	concordant	discordant	Omitted_Call	DEL 20:26259012-26259694	DEL	400-1000	Hom_Ref
HG2_Ill_SpiralSDKrefine_4684	13	124	Deletion	112573518	112573642	189	Hom_Ref	6	7	0.857143	85.7143	5+	80-90	Hom_Ref	8	10	0.8	80	Threshold2	Hom_Ref	Hom_Ref	8	9	0.888889	88.8889	concordant	HG2_Ill_SpiralSDKrefine_4684.jpeg	omitted_region	5+	80-90	concordant	discordant	Omitted_Call	DEL 13:112573518-112573642	DEL	100-300	Hom_Ref
HG2_Ill_tnscope_1661	14	21047	Deletion	106330843	106351890	716	Hom_Var	5	5	1	100	5+	90-100	Hom_Var	10	11	0.909091	90.9091	Threshold2	Hom_Var	Hom_Var	9	10	0.9	90	concordant	HG2_Ill_tnscope_1661.jpeg	omitted_region	5+	80-90	concordant	discordant	Omitted_Call	DEL 14:106330843-106351890	DEL	6000+	Hom_Var
HG2_PB_pbsv_8261	7	78	Deletion	73250881	73250959	677	Het_Var	4	5	0.8	80	2018-03-04	70-80	Het_Var	9	11	0.818182	81.8182	Threshold2	Het_Var	Het_Var	9	10	0.9	90	concordant	HG2_PB_pbsv_8261.jpeg	omitted_region	5+	80-90	concordant	discordant	Omitted_Call	DEL 7:73250881-73250959	DEL	50-100	Het_Var
HG4_Ill_150bpfermikitraw_7730	5	76	Deletion	46001553	46001629	1186	Hom_Ref	8	8	1	100	5+	90-100	Hom_Ref	10	11	0.909091	90.9091	Threshold2	Hom_Ref	Hom_Ref	9	10	0.9	90	concordant	HG4_Ill_150bpfermikitraw_7730.jpeg	omitted_region	5+	80-90	concordant	discordant	Omitted_Call	DEL 5:46001553-46001629	DEL	50-100	Hom_Ref
HG4_Ill_svaba_19324	15	90	Deletion	79475015	79475105	1053	Hom_Var	8	8	1	100	5+	90-100	Hom_Var	10	11	0.909091	90.9091	Threshold2	Hom_Var	Hom_Var	9	10	0.9	90	concordant	HG4_Ill_svaba_19324.jpeg	omitted_region	5+	80-90	concordant	discordant	Omitted_Call	DEL 15:79475015-79475105	DEL	50-100	Hom_Var
HG4_PB_pbsv_12406	11	1811	Deletion	66711753	66713564	353	Hom_Var	6	6	1	100	5+	90-100	Hom_Var	9	10	0.9	90	Threshold2	Hom_Var	Hom_Var	9	10	0.9	90	concordant	HG4_PB_pbsv_12406.jpeg	omitted_region	5+	80-90	concordant	discordant	Omitted_Call	DEL 11:66711753-66713564	DEL	1000-5999	Hom_Var
HG2_Ill_scalpel_14381	15	317	Deletion	32536719	32537036	154	Het_Var	7	8	0.875	87.5	5+	80-90	Het_Var	11	12	0.916667	91.6667	Threshold2	Het_Var	Het_Var	11	12	0.916667	91.6667	concordant	HG2_Ill_scalpel_14381.jpeg	omitted_region	5+	90-100	concordant	discordant	Omitted_Call	DEL 15:32536719-32537036	DEL	300-400	Het_Var
HG2_PB_SVrefine2PB10Xhap12_12142	17	330	Deletion	36450163	36450493	447	Hom_Ref	8	8	1	100	5+	90-100	Hom_Ref	11	14	0.785714	78.5714	Threshold2	Hom_Ref	Hom_Ref	11	12	0.916667	91.6667	concordant	HG2_PB_SVrefine2PB10Xhap12_12142.jpeg	omitted_region	5+	90-100	concordant	discordant	Omitted_Call	DEL 17:36450163-36450493	DEL	300-400	Hom_Ref
HG2_Ill_250bpfermikitraw_7557	5	25	Deletion	1637956	1637981	950	Het_Var	7	7	1	100	5+	90-100	Het_Var	11	12	0.916667	91.6667	Threshold2	Het_Var	Het_Var	11	12	0.916667	91.6667	concordant	HG2_Ill_250bpfermikitraw_7557.jpeg	omitted_region	5+	90-100	concordant	discordant	Omitted_Call	DEL 5:1637956-1637981	DEL	20-50	Het_Var
HG3_PB_pbsv_1324	1	1444	Deletion	243127771	243129215	627	Hom_Ref	8	8	1	100	5+	90-100	Hom_Ref	11	13	0.846154	84.6154	Threshold2	Hom_Ref	Hom_Ref	11	12	0.916667	91.6667	concordant	HG3_PB_pbsv_1324.jpeg	omitted_region	5+	90-100	concordant	discordant	Omitted_Call	DEL 1:243127771-243129215	DEL	1000-5999	Hom_Ref
HG3_PB_assemblyticsfalcon_236	1	293	Deletion	11682893	11683186	916	Hom_Var	7	7	1	100	5+	90-100	Hom_Var	12	13	0.923077	92.3077	Threshold2	Hom_Var	Hom_Var	11	12	0.916667	91.6667	concordant	HG3_PB_assemblyticsfalcon_236.jpeg	omitted_region	5+	90-100	concordant	discordant	Omitted_Call	DEL 1:11682893-11683186	DEL	100-300	Hom_Var
HG2_10X_SVrefine210Xhap12_6974	8	6013	Deletion	126595121	126601134	1130	Hom_Var	9	10	0.9	90	5+	80-90	Hom_Var	13	14	0.928571	92.8571	Threshold2	Hom_Var	Hom_Var	13	14	0.928571	92.8571	concordant	HG2_10X_SVrefine210Xhap12_6974.jpeg	omitted_region	5+	90-100	concordant	discordant	Omitted_Call	DEL 8:126595121-126601134	DEL	6000+	Hom_Var
HG3_PB_assemblyticsfalcon_13924	2	26	Deletion	114422006	114422032	783	Het_Var	10	11	0.909091	90.9091	5+	90-100	Het_Var	13	16	0.8125	81.25	Threshold2	Het_Var	Het_Var	13	14	0.928571	92.8571	concordant	HG3_PB_assemblyticsfalcon_13924.jpeg	omitted_region	5+	90-100	concordant	discordant	Omitted_Call	DEL 2:114422006-114422032	DEL	20-50	Het_Var
HG2_Ill_SVrefine2DISCOVARplusDovetail_12064	7	6036	Deletion	56652479	56658515	425	Het_Var	7	7	1	100	5+	90-100	Het_Var	13	14	0.928571	92.8571	Threshold2	Het_Var	Het_Var	13	13	1	100	concordant	HG2_Ill_SVrefine2DISCOVARplusDovetail_12064.jpeg	omitted_region	5+	90-100	concordant	discordant	Omitted_Call	DEL 7:56652479-56658515	DEL	6000+	Het_Var
HG3_Ill_MetaSV_4032	4	6274	Deletion	190057998	190064272	726	Het_Var	7	7	1	100	5+	90-100	Het_Var	12	12	1	100	Threshold2	Het_Var	Het_Var	11	11	1	100	concordant	HG3_Ill_MetaSV_4032.jpeg	omitted_region	5+	90-100	concordant	discordant	Omitted_Call	DEL 4:190057998-190064272	DEL	6000+	Het_Var
HG2_Ill_Krunchall_25507	22	37154	Deletion	24274144	24311298	927	Het_Var	4	4	1	100	2018-03-04	90-100	Het_Var	7	7	1	100	Threshold2	Het_Var	Het_Var	7	7	1	100	concordant	HG2_Ill_Krunchall_25507.jpeg	omitted_region	5+	90-100	concordant	discordant	Omitted_Call	DEL 22:24274144-24311298	DEL	6000+	Het_Var
HG3_PB_pbsv_5174	4	6274	Deletion	190057998	190064272	946	Het_Var	8	8	1	100	5+	90-100	Het_Var	14	15	0.933333	93.3333	Threshold2	Het_Var	Het_Var	13	13	1	100	concordant	HG3_PB_pbsv_5174.jpeg	omitted_region	5+	90-100	concordant	discordant	Omitted_Call	DEL 4:190057998-190064272	DEL	6000+	Het_Var
HG2_10X_SVrefine210Xhap12_1567	2	276435	Deletion	91987255	92263690	928	Hom_Ref	3	3	1	100	2018-03-04	90-100	Hom_Ref	4	4	1	100	Threshold2	Hom_Ref	Hom_Ref	4	4	1	100	concordant	HG2_10X_SVrefine210Xhap12_1567.jpeg	omitted_region	2018-03-04	90-100	concordant	discordant	Omitted_Call	DEL 2:91987255-92263690	DEL	6000+	Hom_Ref
HG2_PB_SVrefine2PBcRplusDovetail_706	1	124913	Deletion	196758763	196883676	1224	Hom_Ref	1	1	1	100	2018-01-02	90-100	Hom_Ref	3	3	1	100	Threshold2	Hom_Ref	Hom_Ref	3	3	1	100	concordant	HG2_PB_SVrefine2PBcRplusDovetail_706.jpeg	omitted_region	2018-03-04	90-100	concordant	discordant	Omitted_Call	DEL 1:196758763-196883676	DEL	6000+	Hom_Ref
HG3_PB_SVrefine2PBcRDovetail_4464	8	6013	Deletion	126595121	126601134	548	Hom_Var	8	8	1	100	5+	90-100	Hom_Var	11	11	1	100	Threshold2	Hom_Var	Hom_Var	11	11	1	100	concordant	HG3_PB_SVrefine2PBcRDovetail_4464.jpeg	omitted_region	5+	90-100	concordant	discordant	Omitted_Call	DEL 8:126595121-126601134	DEL	6000+	Hom_Var
HG4_Ill_Krunchall_17036	11	21802	Deletion	51341213	51363015	738	Hom_Var	7	7	1	100	5+	90-100	Hom_Var	11	12	0.916667	91.6667	Threshold2	Hom_Var	Hom_Var	10	10	1	100	concordant	HG4_Ill_Krunchall_17036.jpeg	omitted_region	5+	90-100	concordant	discordant	Omitted_Call	DEL 11:51341213-51363015	DEL	6000+	Hom_Var
HG3_PB_pbsv_14895	15	7239	Deletion	22336852	22344091	807	Hom_Var	8	8	1	100	5+	90-100	Hom_Var	10	10	1	100	Threshold2	Hom_Var	Hom_Var	10	10	1	100	concordant	HG3_PB_pbsv_14895.jpeg	omitted_region	5+	90-100	concordant	discordant	Omitted_Call	DEL 15:22336852-22344091	DEL	6000+	Hom_Var
HG2_PB_SVrefine2PB10Xhap12_7094	8	6013	Deletion	126595121	126601134	1182	Hom_Var	9	9	1	100	5+	90-100	Hom_Var	16	16	1	100	Threshold2	Hom_Var	Hom_Var	14	14	1	100	concordant	HG2_PB_SVrefine2PB10Xhap12_7094.jpeg	omitted_region	5+	90-100	concordant	discordant	Omitted_Call	DEL 8:126595121-126601134	DEL	6000+	Hom_Var
HG3_Ill_GATKHC_342	1	64	Deletion	21787745	21787809	1164	Het_Var	6	6	1	100	5+	90-100	Het_Var	12	12	1	100	Threshold2	Het_Var	Het_Var	10	10	1	100	concordant	HG3_Ill_GATKHC_342.jpeg	omitted_region	5+	90-100	concordant	discordant	Omitted_Call	DEL 1:21787745-21787809	DEL	50-100	Het_Var
HG4_Ill_manta_4243	21	913	Deletion	10742374	10743287	284	Het_Var	7	7	1	100	5+	90-100	Het_Var	10	11	0.909091	90.9091	Threshold2	Het_Var	Het_Var	10	10	1	100	concordant	HG4_Ill_manta_4243.jpeg	omitted_region	5+	90-100	concordant	discordant	Omitted_Call	DEL 21:10742374-10743287	DEL	400-1000	Het_Var
HG2_PB_SVrefine2Falcon1plusDovetail_9742	5	779	Deletion	121059231	121060010	588	Het_Var	11	11	1	100	5+	90-100	Het_Var	18	18	1	100	Threshold2	Het_Var	Het_Var	16	16	1	100	concordant	HG2_PB_SVrefine2Falcon1plusDovetail_9742.jpeg	omitted_region	5+	90-100	concordant	discordant	Omitted_Call	DEL 5:121059231-121060010	DEL	400-1000	Het_Var
HG2_10X_SVrefine210Xhap12_13248	21	913	Deletion	10742374	10743287	1059	Het_Var	7	7	1	100	5+	90-100	Het_Var	11	12	0.916667	91.6667	Threshold2	Het_Var	Het_Var	10	10	1	100	concordant	HG2_10X_SVrefine210Xhap12_13248.jpeg	omitted_region	5+	90-100	concordant	discordant	Omitted_Call	DEL 21:10742374-10743287	DEL	400-1000	Het_Var
HG4_PB_SVrefine2Falcon1Dovetail_2739	4	438	Deletion	48661382	48661820	926	Hom_Var	5	5	1	100	5+	90-100	Hom_Var	10	10	1	100	Threshold2	Hom_Var	Hom_Var	9	9	1	100	concordant	HG4_PB_SVrefine2Falcon1Dovetail_2739.jpeg	omitted_region	5+	90-100	concordant	discordant	Omitted_Call	DEL 4:48661382-48661820	DEL	400-1000	Hom_Var
HG2_PB_pbsv_15735	15	315	Deletion	102332534	102332849	615	Het_Var	7	7	1	100	5+	90-100	Het_Var	13	13	1	100	Threshold2	Het_Var	Het_Var	12	12	1	100	concordant	HG2_PB_pbsv_15735.jpeg	omitted_region	5+	90-100	concordant	discordant	Omitted_Call	DEL 15:102332534-102332849	DEL	300-400	Het_Var
HG2_PB_SVrefine2Falcon1plusDovetail_12414	9	342	Deletion	85033845	85034187	860	Het_Var	8	8	1	100	5+	90-100	Het_Var	16	16	1	100	Threshold2	Het_Var	Het_Var	14	14	1	100	concordant	HG2_PB_SVrefine2Falcon1plusDovetail_12414.jpeg	omitted_region	5+	90-100	concordant	discordant	Omitted_Call	DEL 9:85033845-85034187	DEL	300-400	Het_Var
HG4_Ill_Krunchall_2662	2	310	Deletion	65807291	65807601	534	Het_Var	3	3	1	100	2018-03-04	90-100	Het_Var	4	4	1	100	Threshold2	Het_Var	Het_Var	4	4	1	100	concordant	HG4_Ill_Krunchall_2662.jpeg	Another_Var	2018-03-04	90-100	concordant	discordant	v0.6_Call	DEL 2:65807291-65807601	DEL	300-400	Het_Var
HG3_Ill_MetaSV_4888	7	345	Deletion	62133978	62134323	1115	Hom_Ref	6	6	1	100	5+	90-100	Hom_Ref	8	8	1	100	Threshold2	Hom_Ref	Hom_Ref	8	8	1	100	concordant	HG3_Ill_MetaSV_4888.jpeg	omitted_region	5+	90-100	concordant	discordant	Omitted_Call	DEL 7:62133978-62134323	DEL	300-400	Hom_Ref
HG2_Ill_SVrefine2DISCOVARplusDovetail_7564	20	312	Deletion	35815609	35815921	122	Hom_Var	8	8	1	100	5+	90-100	Hom_Var	12	12	1	100	Threshold2	Hom_Var	Hom_Var	11	11	1	100	concordant	HG2_Ill_SVrefine2DISCOVARplusDovetail_7564.jpeg	omitted_region	5+	90-100	concordant	discordant	Omitted_Call	DEL 20:35815609-35815921	DEL	300-400	Hom_Var
HG4_Ill_250bpfermikitraw_16428	11	22	Deletion	71542565	71542587	498	Het_Var	7	7	1	100	5+	90-100	Het_Var	13	14	0.928571	92.8571	Threshold2	Het_Var	Het_Var	12	12	1	100	concordant	HG4_Ill_250bpfermikitraw_16428.jpeg	omitted_region	5+	90-100	concordant	discordant	Omitted_Call	DEL 11:71542565-71542587	DEL	20-50	Het_Var
HG2_Ill_GATKHC_9998	5	23	Deletion	99725432	99725455	691	Het_Var	6	6	1	100	5+	90-100	Het_Var	9	10	0.9	90	Threshold2	Het_Var	Het_Var	9	9	1	100	concordant	HG2_Ill_GATKHC_9998.jpeg	omitted_region	5+	90-100	concordant	discordant	Omitted_Call	DEL 5:99725432-99725455	DEL	20-50	Het_Var
HG3_PB_pbsv_7975	7	1264	Deletion	63148369	63149633	492	Hom_Ref	5	5	1	100	5+	90-100	Hom_Ref	9	9	1	100	Threshold2	Hom_Ref	Hom_Ref	9	9	1	100	concordant	HG3_PB_pbsv_7975.jpeg	omitted_region	5+	90-100	concordant	discordant	Omitted_Call	DEL 7:63148369-63149633	DEL	1000-5999	Hom_Ref
HG2_PB_HySA_30327	17	1845	Deletion	18471487	18473332	1194	Hom_Ref	7	7	1	100	5+	90-100	Hom_Ref	12	13	0.923077	92.3077	Threshold2	Hom_Ref	Hom_Ref	11	11	1	100	concordant	HG2_PB_HySA_30327.jpeg	omitted_region	5+	90-100	concordant	discordant	Omitted_Call	DEL 17:18471487-18473332	DEL	1000-5999	Hom_Ref
HG4_Ill_manta_3565	15	280	Deletion	34741744	34742024	876	Het_Var	6	6	1	100	5+	90-100	Het_Var	10	10	1	100	Threshold2	Het_Var	Het_Var	10	10	1	100	concordant	HG4_Ill_manta_3565.jpeg	omitted_region	5+	90-100	concordant	discordant	Omitted_Call	DEL 15:34741744-34742024	DEL	100-300	Het_Var
HG4_Ill_MetaSV_969	11	199	Deletion	134359365	134359564	974	Het_Var	6	6	1	100	5+	90-100	Het_Var	11	13	0.846154	84.6154	Threshold2	Het_Var	Het_Var	11	11	1	100	concordant	HG4_Ill_MetaSV_969.jpeg	omitted_region	5+	90-100	concordant	discordant	Omitted_Call	DEL 11:134359365-134359564	DEL	100-300	Het_Var
HG4_Ill_MetaSV_1875	16	215	Deletion	58961953	58962168	449	Hom_Ref	7	7	1	100	5+	90-100	Hom_Ref	8	9	0.888889	88.8889	Threshold2	Hom_Ref	Hom_Ref	8	8	1	100	concordant	HG4_Ill_MetaSV_1875.jpeg	omitted_region	5+	90-100	concordant	discordant	Omitted_Call	DEL 16:58961953-58962168	DEL	100-300	Hom_Ref
HG2_PB_SVrefine2Falcon1plusDovetail_3050	13	140	Deletion	70734797	70734937	906	Hom_Var	9	9	1	100	5+	90-100	Hom_Var	12	12	1	100	Threshold2	Hom_Var	Hom_Var	11	11	1	100	concordant	HG2_PB_SVrefine2Falcon1plusDovetail_3050.jpeg	omitted_region	5+	90-100	concordant	discordant	Omitted_Call	DEL 13:70734797-70734937	DEL	100-300	Hom_Var
HG3_PB_SVrefine2PBcRDovetail_7533	16	816127	Deletion	21740424	22556551	294	Hom_Ref	5	5	1	100	5+	90-100	Hom_Ref	9	9	1	100	Threshold2	Hom_Ref	Hom_Ref	8	8	1	100	concordant	HG3_PB_SVrefine2PBcRDovetail_7533.jpeg	omitted_region	5+	90-100	concordant	discordant	Omitted_Call	DEL 16:21740424-22556551	DEL		Hom_Ref
HG3_Ill_MetaSV_24	1	587	Deletion	5350689	5351276	1089	Another_Var	6	8	0.75	75	5+	70-80	Another_Var	8	14	0.571429	57.1429	Threshold2	Another_Var	Another_Var	8	13	0.615385	61.5385	concordant	HG3_Ill_MetaSV_24.jpeg	Another_Var	5+	60-70	concordant	concordant	v0.6_Call	DEL 1:5350689-5351276	DEL	400-1000	Another_Var
HG3_10X_allpass_246	1	2222	Deletion	236549101	236551323	58	Het_Var	4	8	0.5	50	2018-03-04	40-50	Het_Var	8	14	0.571429	57.1429	Threshold2	Het_Var	Het_Var	8	13	0.615385	61.5385	concordant	HG3_10X_allpass_246.jpeg	Het_Var	5+	60-70	concordant	concordant	v0.6_Call	DEL 1:236549101-236551323	DEL	1000-5999	Het_Var
HG4_Ill_scalpel_13834	14	20	Deletion	93625054	93625074	436	Het_Var	3	4	0.75	75	2018-03-04	70-80	Het_Var	6	10	0.6	60	Threshold2	Het_Var	Het_Var	5	8	0.625	62.5	concordant	HG4_Ill_scalpel_13834.jpeg	Het_Var	5+	60-70	concordant	concordant	v0.6_Call	DEL 14:93625054-93625074	DEL	20-50	Het_Var
HG3_Ill_Krunchall_19213	13	30	Deletion	107569931	107569961	515	Hom_Var	2	3	0.666667	66.6667	2018-01-02	60-70	Hom_Var	5	9	0.555556	55.5556	Threshold2	Hom_Var	Hom_Var	5	8	0.625	62.5	concordant	HG3_Ill_Krunchall_19213.jpeg	Hom_Var	5+	60-70	concordant	concordant	v0.6_Call	DEL 13:107569931-107569961	DEL	20-50	Hom_Var
HG2_Ill_GATKHC_20719	12	24	Deletion	9944946	9944970	576	Hom_Var	2	2	1	100	2018-01-02	90-100	Hom_Var	6	11	0.545455	54.5455	Threshold2	Hom_Var	Hom_Var	5	8	0.625	62.5	concordant	HG2_Ill_GATKHC_20719.jpeg	Hom_Var	5+	60-70	concordant	concordant	v0.6_Call	DEL 12:9944946-9944970	DEL	20-50	Hom_Var
HG2_Ill_MetaSV_3695	4	23208	Deletion	118579860	118603068	996	Hom_Ref	3	5	0.6	60	2018-03-04	50-60	Hom_Ref	7	11	0.636364	63.6364	Threshold2	Hom_Ref	Hom_Ref	6	9	0.666667	66.6667	concordant	HG2_Ill_MetaSV_3695.jpeg	Hom_Ref	5+	60-70	concordant	concordant	v0.6_Call	DEL 4:118579860-118603068	DEL	6000+	Hom_Ref
HG4_Ill_scalpel_7532	7	90	Deletion	15393976	15394066	527	Hom_Ref	4	5	0.8	80	2018-03-04	70-80	Hom_Ref	4	8	0.5	50	Threshold2	Hom_Ref	Hom_Ref	4	6	0.666667	66.6667	concordant	HG4_Ill_scalpel_7532.jpeg	Hom_Ref	2018-03-04	60-70	concordant	concordant	v0.6_Call	DEL 7:15393976-15394066	DEL	50-100	Hom_Ref
HG3_Ill_scalpel_1133	1	59	Deletion	203342335	203342394	988	Hom_Var	5	6	0.833333	83.3333	5+	80-90	Hom_Var	6	10	0.6	60	Threshold2	Hom_Var	Hom_Var	6	9	0.666667	66.6667	concordant	HG3_Ill_scalpel_1133.jpeg	Hom_Var	5+	60-70	concordant	concordant	v0.6_Call	DEL 1:203342335-203342394	DEL	50-100	Hom_Var
HG2_PB_assemblyticsfalcon_25146	7	38	Deletion	91657008	91657046	473	Het_Var	4	6	0.666667	66.6667	2018-03-04	60-70	Het_Var	7	11	0.636364	63.6364	Threshold2	Het_Var	Het_Var	6	9	0.666667	66.6667	concordant	HG2_PB_assemblyticsfalcon_25146.jpeg	Het_Var	5+	60-70	concordant	concordant	v0.6_Call	DEL 7:91657008-91657046	DEL	20-50	Het_Var
HG3_Ill_svaba_10305	7	22	Deletion	31117011	31117033	1062	Hom_Var	1	1	1	100	2018-01-02	90-100	Hom_Var	4	7	0.571429	57.1429	Threshold2	Hom_Var	Hom_Var	4	6	0.666667	66.6667	concordant	HG3_Ill_svaba_10305.jpeg	Hom_Var	2018-03-04	60-70	concordant	concordant	v0.6_Call	DEL 7:31117011-31117033	DEL	20-50	Hom_Var
HG4_PB_assemblyticsfalcon_7114	13	24	Deletion	85576327	85576351	1088	Hom_Var	3	3	1	100	2018-03-04	90-100	Hom_Var	4	7	0.571429	57.1429	Threshold2	Hom_Var	Hom_Var	4	6	0.666667	66.6667	concordant	HG4_PB_assemblyticsfalcon_7114.jpeg	Hom_Var	2018-03-04	60-70	concordant	concordant	v0.6_Call	DEL 13:85576327-85576351	DEL	20-50	Hom_Var
HG2_Ill_MetaSV_384	1	2295	Deletion	236549032	236551327	211	Het_Var	5	8	0.625	62.5	5+	60-70	Het_Var	8	12	0.666667	66.6667	Threshold2	Het_Var	Het_Var	8	12	0.666667	66.6667	concordant	HG2_Ill_MetaSV_384.jpeg	Het_Var	5+	60-70	concordant	concordant	v0.6_Call	DEL 1:236549032-236551327	DEL	1000-5999	Het_Var
HG2_Ill_MetaSV_1241	13	3699	Deletion	49533201	49536900	665	Het_Var	5	7	0.714286	71.4286	5+	70-80	Het_Var	8	12	0.666667	66.6667	Threshold2	Het_Var	Het_Var	8	12	0.666667	66.6667	concordant	HG2_Ill_MetaSV_1241.jpeg	Het_Var	5+	60-70	concordant	concordant	v0.6_Call	DEL 13:49533201-49536900	DEL	1000-5999	Het_Var
HG4_PB_pbsv_20283	23	4692	Deletion	85605171	85609863	1101	Hom_Var	5	6	0.833333	83.3333	5+	80-90	Hom_Var	6	9	0.666667	66.6667	Threshold2	Hom_Var	Hom_Var	6	9	0.666667	66.6667	concordant	HG4_PB_pbsv_20283.jpeg	Hom_Var	5+	60-70	concordant	concordant	v0.6_Call	DEL X:85605171-85609863	DEL	1000-5999	Hom_Var
HG2_PB_pbsv_20130	23	247	Deletion	39635800	39636047	1160	Hom_Var	2	4	0.5	50	2018-01-02	40-50	Hom_Var	4	7	0.571429	57.1429	Threshold2	Hom_Var	Hom_Var	4	6	0.666667	66.6667	concordant	HG2_PB_pbsv_20130.jpeg	Hom_Var	2018-03-04	60-70	concordant	concordant	v0.6_Call	DEL X:39635800-39636047	DEL	100-300	Hom_Var
HG2_PB_SVrefine2PB10Xhap12_224	1	267	Deletion	19151719	19151986	1270	Hom_Var	5	6	0.833333	83.3333	5+	80-90	Hom_Var	6	9	0.666667	66.6667	Threshold2	Hom_Var	Hom_Var	6	9	0.666667	66.6667	concordant	HG2_PB_SVrefine2PB10Xhap12_224.jpeg	Hom_Var	5+	60-70	concordant	concordant	v0.6_Call	DEL 1:19151719-19151986	DEL	100-300	Hom_Var
HG3_PB_assemblyticsfalcon_6862	13	345	Deletion	44380306	44380651	856	Hom_Ref	5	7	0.714286	71.4286	5+	70-80	Hom_Ref	8	13	0.615385	61.5385	Threshold2	Hom_Ref	Hom_Ref	7	10	0.7	70	concordant	HG3_PB_assemblyticsfalcon_6862.jpeg	Hom_Ref	5+	60-70	concordant	concordant	v0.6_Call	DEL 13:44380306-44380651	DEL	300-400	Hom_Ref
HG4_Ill_GATKHCSBGrefine_7267	9	395	Deletion	101276313	101276708	275	Hom_Var	6	6	1	100	5+	90-100	Hom_Var	9	12	0.75	75	Threshold2	Hom_Var	Hom_Var	7	10	0.7	70	concordant	HG4_Ill_GATKHCSBGrefine_7267.jpeg	Hom_Var	5+	60-70	concordant	concordant	v0.6_Call	DEL 9:101276313-101276708	DEL	300-400	Hom_Var
HG2_10X_SVrefine210Xhap12_13852	23	8862	Deletion	10984680	10993542	832	Hom_Ref	4	4	1	100	2018-03-04	90-100	Hom_Ref	5	8	0.625	62.5	Threshold2	Hom_Ref	Hom_Ref	5	7	0.714286	71.4286	concordant	HG2_10X_SVrefine210Xhap12_13852.jpeg	Hom_Ref	5+	70-80	concordant	concordant	v0.6_Call	DEL X:10984680-10993542	DEL	6000+	Hom_Ref
HG3_Ill_MetaSV_1968	16	6073	Deletion	83670839	83676912	894	Hom_Ref	5	7	0.714286	71.4286	5+	70-80	Hom_Ref	9	12	0.75	75	Threshold2	Hom_Ref	Hom_Ref	8	11	0.727273	72.7273	concordant	HG3_Ill_MetaSV_1968.jpeg	Hom_Ref	5+	70-80	concordant	concordant	v0.6_Call	DEL 16:83670839-83676912	DEL	6000+	Hom_Ref
HG3_PB_pbsv_16065	17	97	Deletion	203384	203481	383	Hom_Var	6	6	1	100	5+	90-100	Hom_Var	9	12	0.75	75	Threshold2	Hom_Var	Hom_Var	8	11	0.727273	72.7273	concordant	HG3_PB_pbsv_16065.jpeg	Hom_Var	5+	70-80	concordant	concordant	v0.6_Call	DEL 17:203384-203481	DEL	50-100	Hom_Var
HG2_Ill_GATKHCSBGrefine_473	1	62	Deletion	111838207	111838269	254	Hom_Var	6	6	1	100	5+	90-100	Hom_Var	7	10	0.7	70	Threshold2	Hom_Var	Hom_Var	6	8	0.75	75	concordant	HG2_Ill_GATKHCSBGrefine_473.jpeg	Hom_Var	5+	70-80	concordant	concordant	v0.6_Call	DEL 1:111838207-111838269	DEL	50-100	Hom_Var
HG2_PB_assemblyticsfalcon_5601	12	318	Deletion	47075365	47075683	92	Hom_Var	4	4	1	100	2018-03-04	90-100	Hom_Var	6	10	0.6	60	Threshold2	Hom_Var	Hom_Var	6	8	0.75	75	concordant	HG2_PB_assemblyticsfalcon_5601.jpeg	Hom_Var	5+	70-80	concordant	concordant	v0.6_Call	DEL 12:47075365-47075683	DEL	300-400	Hom_Var
HG4_Ill_250bpfermikitraw_24923	22	28	Deletion	34287001	34287029	114	Hom_Var	6	6	1	100	5+	90-100	Hom_Var	10	13	0.769231	76.9231	Threshold2	Hom_Var	Hom_Var	9	12	0.75	75	concordant	HG4_Ill_250bpfermikitraw_24923.jpeg	Hom_Var	5+	70-80	concordant	concordant	v0.6_Call	DEL 22:34287001-34287029	DEL	20-50	Hom_Var
HG3_Ill_Krunchall_21525	16	44	Deletion	81317845	81317889	861	Hom_Var	4	4	1	100	2018-03-04	90-100	Hom_Var	6	8	0.75	75	Threshold2	Hom_Var	Hom_Var	6	8	0.75	75	concordant	HG3_Ill_Krunchall_21525.jpeg	Hom_Var	5+	70-80	concordant	concordant	v0.6_Call	DEL 16:81317845-81317889	DEL	20-50	Hom_Var
HG2_Ill_150bpfermikitraw_24627	23	23	Deletion	102504574	102504597	966	Hom_Var	4	4	1	100	2018-03-04	90-100	Hom_Var	6	8	0.75	75	Threshold2	Hom_Var	Hom_Var	6	8	0.75	75	concordant	HG2_Ill_150bpfermikitraw_24627.jpeg	Hom_Var	5+	70-80	concordant	concordant	v0.6_Call	DEL X:102504574-102504597	DEL	20-50	Hom_Var
HG4_PB_SVrefine2Falcon1Dovetail_7553	11	4867	Deletion	63197918	63202785	595	Hom_Ref	3	4	0.75	75	2018-03-04	70-80	Hom_Ref	6	10	0.6	60	Threshold2	Hom_Ref	Hom_Ref	6	8	0.75	75	concordant	HG4_PB_SVrefine2Falcon1Dovetail_7553.jpeg	Hom_Ref	5+	70-80	concordant	concordant	v0.6_Call	DEL 11:63197918-63202785	DEL	1000-5999	Hom_Ref
HG2_PB_SVrefine2PB10Xhap12_7400	9	136	Deletion	18751959	18752095	1082	Another_Var	8	8	1	100	5+	90-100	Another_Var	10	13	0.769231	76.9231	Threshold2	Another_Var	Another_Var	9	12	0.75	75	concordant	HG2_PB_SVrefine2PB10Xhap12_7400.jpeg	Another_Var	5+	70-80	concordant	concordant	v0.6_Call	DEL 9:18751959-18752095	DEL	100-300	Another_Var
HG4_Ill_MetaSV_3193	22	957	Deletion	29177300	29178257	255	Another_Var	8	9	0.888889	88.8889	5+	80-90	Another_Var	10	13	0.769231	76.9231	Threshold2	Another_Var	Another_Var	10	13	0.769231	76.9231	concordant	HG4_Ill_MetaSV_3193.jpeg	Another_Var	5+	70-80	concordant	concordant	v0.6_Call	DEL 22:29177300-29178257	DEL	400-1000	Another_Var
HG2_Ill_manta_2288	7	323	Deletion	24677925	24678248	586	Het_Var	4	6	0.666667	66.6667	2018-03-04	60-70	Het_Var	12	15	0.8	80	Threshold2	Het_Var	Het_Var	10	13	0.769231	76.9231	concordant	HG2_Ill_manta_2288.jpeg	Het_Var	5+	70-80	concordant	concordant	v0.6_Call	DEL 7:24677925-24678248	DEL	300-400	Het_Var
HG3_Ill_GATKHCSBGrefine_7094	9	136	Deletion	114014144	114014280	1129	Het_Var	6	8	0.75	75	5+	70-80	Het_Var	10	14	0.714286	71.4286	Threshold2	Het_Var	Het_Var	10	13	0.769231	76.9231	concordant	HG3_Ill_GATKHCSBGrefine_7094.jpeg	Het_Var	5+	70-80	concordant	concordant	v0.6_Call	DEL 9:114014144-114014280	DEL	100-300	Het_Var
HG3_Ill_GATKHCSBGrefine_12339	21	59	Deletion	44260095	44260154	601	Hom_Ref	6	7	0.857143	85.7143	5+	80-90	Hom_Ref	7	10	0.7	70	Threshold2	Hom_Ref	Hom_Ref	7	9	0.777778	77.7778	concordant	HG3_Ill_GATKHCSBGrefine_12339.jpeg	Hom_Ref	5+	70-80	concordant	concordant	v0.6_Call	DEL 21:44260095-44260154	DEL	50-100	Hom_Ref
HG2_PB_assemblyticsPBcR_313	1	93	Deletion	20952572	20952665	1075	Hom_Var	4	5	0.8	80	2018-03-04	70-80	Hom_Var	7	11	0.636364	63.6364	Threshold2	Hom_Var	Hom_Var	7	9	0.777778	77.7778	concordant	HG2_PB_assemblyticsPBcR_313.jpeg	Hom_Var	5+	70-80	concordant	concordant	v0.6_Call	DEL 1:20952572-20952665	DEL	50-100	Hom_Var
HG3_PB_assemblyticsfalcon_16229	21	87	Deletion	42458074	42458161	1211	Hom_Var	6	6	1	100	5+	90-100	Hom_Var	8	11	0.727273	72.7273	Threshold2	Hom_Var	Hom_Var	7	9	0.777778	77.7778	concordant	HG3_PB_assemblyticsfalcon_16229.jpeg	Hom_Var	5+	70-80	concordant	concordant	v0.6_Call	DEL 21:42458074-42458161	DEL	50-100	Hom_Var
HG2_PB_SVrefine2PB10Xhap12_3158	4	431	Deletion	15792609	15793040	370	Het_Var	5	5	1	100	5+	90-100	Het_Var	7	11	0.636364	63.6364	Threshold2	Het_Var	Het_Var	7	9	0.777778	77.7778	concordant	HG2_PB_SVrefine2PB10Xhap12_3158.jpeg	Het_Var	5+	70-80	concordant	concordant	v0.6_Call	DEL 4:15792609-15793040	DEL	400-1000	Het_Var
HG3_Ill_GATKHCSBGrefine_236	1	50	Deletion	48848474	48848524	36	Het_Var	11	12	0.916667	91.6667	5+	90-100	Het_Var	16	22	0.727273	72.7273	Threshold2	Het_Var	Het_Var	14	18	0.777778	77.7778	concordant	HG3_Ill_GATKHCSBGrefine_236.jpeg	Het_Var	5+	70-80	concordant	concordant	v0.6_Call	DEL 1:48848474-48848524	DEL	20-50	Het_Var
HG3_Ill_FB_16613	23	20	Deletion	76044678	76044698	153	Hom_Ref	5	5	1	100	5+	90-100	Hom_Ref	8	10	0.8	80	Threshold2	Hom_Ref	Hom_Ref	7	9	0.777778	77.7778	concordant	HG3_Ill_FB_16613.jpeg	Hom_Ref	5+	70-80	concordant	concordant	v0.6_Call	DEL X:76044678-76044698	DEL	20-50	Hom_Ref
HG2_Ill_MetaSV_1513	14	5047	Deletion	85297108	85302155	744	Het_Var	5	6	0.833333	83.3333	5+	80-90	Het_Var	7	9	0.777778	77.7778	Threshold2	Het_Var	Het_Var	7	9	0.777778	77.7778	concordant	HG2_Ill_MetaSV_1513.jpeg	Het_Var	5+	70-80	concordant	concordant	v0.6_Call	DEL 14:85297108-85302155	DEL	1000-5999	Het_Var
HG4_Ill_FB_11028	11	20	Deletion	124698181	124698201	703	Het_Var	5	8	0.625	62.5	5+	60-70	Het_Var	12	15	0.8	80	Threshold2	Het_Var	Het_Var	11	14	0.785714	78.5714	concordant	HG4_Ill_FB_11028.jpeg	Het_Var	5+	70-80	concordant	concordant	v0.6_Call	DEL 11:124698181-124698201	DEL	20-50	Het_Var
HG4_Ill_MetaSV_5835	23	200	Deletion	33709835	33710035	12	Hom_Var	6	8	0.75	75	5+	70-80	Hom_Var	16	24	0.666667	66.6667	Threshold2	Hom_Var	Hom_Var	11	14	0.785714	78.5714	concordant	HG4_Ill_MetaSV_5835.jpeg	Hom_Var	5+	70-80	concordant	concordant	v0.6_Call	DEL X:33709835-33710035	DEL	100-300	Hom_Var
HG2_10X_allpass_134	1	32190	Deletion	152555548	152587738	461	Het_Var	4	4	1	100	2018-03-04	90-100	Het_Var	5	6	0.833333	83.3333	Threshold2	Het_Var	Het_Var	4	5	0.8	80	concordant	HG2_10X_allpass_134.jpeg	Het_Var	2018-03-04	70-80	concordant	concordant	v0.6_Call	DEL 1:152555548-152587738	DEL	6000+	Het_Var
HG4_Ill_250bpfermikitraw_20311	15	68	Deletion	72429571	72429639	1142	Hom_Ref	7	7	1	100	5+	90-100	Hom_Ref	9	12	0.75	75	Threshold2	Hom_Ref	Hom_Ref	8	10	0.8	80	concordant	HG4_Ill_250bpfermikitraw_20311.jpeg	Hom_Ref	5+	70-80	concordant	concordant	v0.6_Call	DEL 15:72429571-72429639	DEL	50-100	Hom_Ref
HG2_PB_pbsv_14113	13	988	Deletion	61315244	61316232	565	Het_Var	3	4	0.75	75	2018-03-04	70-80	Het_Var	5	7	0.714286	71.4286	Threshold2	Het_Var	Het_Var	4	5	0.8	80	concordant	HG2_PB_pbsv_14113.jpeg	Het_Var	2018-03-04	70-80	concordant	concordant	v0.6_Call	DEL 13:61315244-61316232	DEL	400-1000	Het_Var
HG3_PB_SVrefine2Falcon1Dovetail_3066	4	327	Deletion	144573287	144573614	220	Hom_Ref	5	6	0.833333	83.3333	5+	80-90	Hom_Ref	9	11	0.818182	81.8182	Threshold2	Hom_Ref	Hom_Ref	8	10	0.8	80	concordant	HG3_PB_SVrefine2Falcon1Dovetail_3066.jpeg	Hom_Ref	5+	70-80	concordant	concordant	v0.6_Call	DEL 4:144573287-144573614	DEL	300-400	Hom_Ref
HG2_Ill_Krunchall_16667	11	322	Deletion	41006925	41007247	200	Hom_Var	6	6	1	100	5+	90-100	Hom_Var	9	11	0.818182	81.8182	Threshold2	Hom_Var	Hom_Var	8	10	0.8	80	concordant	HG2_Ill_Krunchall_16667.jpeg	Hom_Var	5+	70-80	concordant	concordant	v0.6_Call	DEL 11:41006925-41007247	DEL	300-400	Hom_Var
HG3_Ill_150bpfermikitraw_7748	5	23	Deletion	78835934	78835957	1068	Het_Var	6	7	0.857143	85.7143	5+	80-90	Het_Var	9	12	0.75	75	Threshold2	Het_Var	Het_Var	8	10	0.8	80	concordant	HG3_Ill_150bpfermikitraw_7748.jpeg	Het_Var	5+	70-80	concordant	concordant	v0.6_Call	DEL 5:78835934-78835957	DEL	20-50	Het_Var
HG4_Ill_150bpfermikitraw_8358	5	26	Deletion	135222277	135222303	1291	Het_Var	2	2	1	100	2018-01-02	90-100	Het_Var	4	7	0.571429	57.1429	Threshold2	Het_Var	Het_Var	4	5	0.8	80	concordant	HG4_Ill_150bpfermikitraw_8358.jpeg	Het_Var	2018-03-04	70-80	concordant	concordant	v0.6_Call	DEL 5:135222277-135222303	DEL	20-50	Het_Var
HG3_Ill_GATKHC_2182	1	25	Deletion	238402336	238402361	263	Hom_Var	6	7	0.857143	85.7143	5+	80-90	Hom_Var	9	11	0.818182	81.8182	Threshold2	Hom_Var	Hom_Var	8	10	0.8	80	concordant	HG3_Ill_GATKHC_2182.jpeg	Hom_Var	5+	70-80	concordant	concordant	v0.6_Call	DEL 1:238402336-238402361	DEL	20-50	Hom_Var
HG2_PB_assemblyticsfalcon_4786	11	1779	Deletion	103916404	103918183	566	Het_Var	4	6	0.666667	66.6667	2018-03-04	60-70	Het_Var	8	12	0.666667	66.6667	Threshold2	Het_Var	Het_Var	8	10	0.8	80	concordant	HG2_PB_assemblyticsfalcon_4786.jpeg	Het_Var	5+	70-80	concordant	concordant	v0.6_Call	DEL 11:103916404-103918183	DEL	1000-5999	Het_Var
HG3_PB_HySA_8411	5	115	Deletion	2907807	2907922	426	Hom_Var	2	2	1	100	2018-01-02	90-100	Hom_Var	5	7	0.714286	71.4286	Threshold2	Hom_Var	Hom_Var	4	5	0.8	80	concordant	HG3_PB_HySA_8411.jpeg	Hom_Var	2018-03-04	70-80	concordant	concordant	v0.6_Call	DEL 5:2907807-2907922	DEL	100-300	Hom_Var
HG2_Ill_SpiralSDKrefine_15996	7	556	Deletion	77142486	77143042	288	Hom_Ref	10	10	1	100	5+	90-100	Hom_Ref	13	16	0.8125	81.25	Threshold2	Hom_Ref	Hom_Ref	13	16	0.8125	81.25	concordant	HG2_Ill_SpiralSDKrefine_15996.jpeg	Hom_Ref	5+	80-90	concordant	concordant	v0.6_Call	DEL 7:77142486-77143042	DEL	400-1000	Hom_Ref
HG3_PB_assemblyticsfalcon_739	1	8121	Deletion	73450208	73458329	1265	Hom_Ref	7	7	1	100	5+	90-100	Hom_Ref	10	13	0.769231	76.9231	Threshold2	Hom_Ref	Hom_Ref	9	11	0.818182	81.8182	concordant	HG3_PB_assemblyticsfalcon_739.jpeg	Hom_Ref	5+	80-90	concordant	concordant	v0.6_Call	DEL 1:73450208-73458329	DEL	6000+	Hom_Ref
HG2_Ill_150bpfermikitraw_5482	4	61	Deletion	17266273	17266334	907	Hom_Ref	6	6	1	100	5+	90-100	Hom_Ref	10	13	0.769231	76.9231	Threshold2	Hom_Ref	Hom_Ref	9	11	0.818182	81.8182	concordant	HG2_Ill_150bpfermikitraw_5482.jpeg	Hom_Ref	5+	80-90	concordant	concordant	v0.6_Call	DEL 4:17266273-17266334	DEL	50-100	Hom_Ref
HG3_PB_assemblyticsfalcon_25085	7	336	Deletion	104615198	104615534	920	Hom_Ref	6	7	0.857143	85.7143	5+	80-90	Hom_Ref	9	11	0.818182	81.8182	Threshold2	Hom_Ref	Hom_Ref	9	11	0.818182	81.8182	concordant	HG3_PB_assemblyticsfalcon_25085.jpeg	Hom_Ref	5+	80-90	concordant	concordant	v0.6_Call	DEL 7:104615198-104615534	DEL	300-400	Hom_Ref
HG2_Ill_Spiral_8	1	310	Deletion	28247805	28248115	437	Hom_Var	6	7	0.857143	85.7143	5+	80-90	Hom_Var	10	13	0.769231	76.9231	Threshold2	Hom_Var	Hom_Var	9	11	0.818182	81.8182	concordant	HG2_Ill_Spiral_8.jpeg	Hom_Var	5+	80-90	concordant	concordant	v0.6_Call	DEL 1:28247805-28248115	DEL	300-400	Hom_Var
HG4_PB_assemblyticsfalcon_7322	13	303	Deletion	107924550	107924853	1099	Hom_Var	6	6	1	100	5+	90-100	Hom_Var	9	12	0.75	75	Threshold2	Hom_Var	Hom_Var	9	11	0.818182	81.8182	concordant	HG4_PB_assemblyticsfalcon_7322.jpeg	Hom_Var	5+	80-90	concordant	concordant	v0.6_Call	DEL 13:107924550-107924853	DEL	300-400	Hom_Var
HG2_10X_SVrefine210Xhap12_7394	9	1080	Deletion	90246870	90247950	396	Hom_Ref	7	8	0.875	87.5	5+	80-90	Hom_Ref	10	13	0.769231	76.9231	Threshold2	Hom_Ref	Hom_Ref	9	11	0.818182	81.8182	concordant	HG2_10X_SVrefine210Xhap12_7394.jpeg	Hom_Ref	5+	80-90	concordant	concordant	v0.6_Call	DEL 9:90246870-90247950	DEL	1000-5999	Hom_Ref
HG3_10X_allpass_3492	20	2629	Deletion	42271943	42274572	312	Hom_Var	6	7	0.857143	85.7143	5+	80-90	Hom_Var	9	11	0.818182	81.8182	Threshold2	Hom_Var	Hom_Var	9	11	0.818182	81.8182	concordant	HG3_10X_allpass_3492.jpeg	Hom_Var	5+	80-90	concordant	concordant	v0.6_Call	DEL 20:42271943-42274572	DEL	1000-5999	Hom_Var
HG3_Ill_GATKHCSBGrefine_8314	11	761	Deletion	86285961	86286722	287	Hom_Ref	8	9	0.888889	88.8889	5+	80-90	Hom_Ref	10	12	0.833333	83.3333	Threshold2	Hom_Ref	Hom_Ref	10	12	0.833333	83.3333	concordant	HG3_Ill_GATKHCSBGrefine_8314.jpeg	Hom_Ref	5+	80-90	concordant	concordant	v0.6_Call	DEL 11:86285961-86286722	DEL	400-1000	Hom_Ref
HG2_Ill_SpiralSDKrefine_14012	5	416	Deletion	141748532	141748948	448	Hom_Ref	6	6	1	100	5+	90-100	Hom_Ref	11	13	0.846154	84.6154	Threshold2	Hom_Ref	Hom_Ref	10	12	0.833333	83.3333	concordant	HG2_Ill_SpiralSDKrefine_14012.jpeg	Hom_Ref	5+	80-90	concordant	concordant	v0.6_Call	DEL 5:141748532-141748948	DEL	400-1000	Hom_Ref
HG2_10X_allpass_1068	5	377	Deletion	174819768	174820145	331	Het_Var	4	4	1	100	2018-03-04	90-100	Het_Var	5	8	0.625	62.5	Threshold2	Het_Var	Het_Var	5	6	0.833333	83.3333	concordant	HG2_10X_allpass_1068.jpeg	Het_Var	5+	80-90	concordant	concordant	v0.6_Call	DEL 5:174819768-174820145	DEL	300-400	Het_Var
HG4_10X_allpass_1226	5	345	Deletion	158592397	158592742	349	Het_Var	6	7	0.857143	85.7143	5+	80-90	Het_Var	11	14	0.785714	78.5714	Threshold2	Het_Var	Het_Var	10	12	0.833333	83.3333	concordant	HG4_10X_allpass_1226.jpeg	Het_Var	5+	80-90	concordant	concordant	v0.6_Call	DEL 5:158592397-158592742	DEL	300-400	Het_Var
HG2_PB_SVrefine2Falcon2Bionano_2253	4	336	Deletion	89037668	89038004	1012	Hom_Var	7	7	1	100	5+	90-100	Hom_Var	11	13	0.846154	84.6154	Threshold2	Hom_Var	Hom_Var	10	12	0.833333	83.3333	concordant	HG2_PB_SVrefine2Falcon2Bionano_2253.jpeg	Hom_Var	5+	80-90	concordant	concordant	v0.6_Call	DEL 4:89037668-89038004	DEL	300-400	Hom_Var
HG4_PB_HySA_1839	1	24	Deletion	224396746	224396770	439	Het_Var	5	6	0.833333	83.3333	5+	80-90	Het_Var	10	13	0.769231	76.9231	Threshold2	Het_Var	Het_Var	10	12	0.833333	83.3333	concordant	HG4_PB_HySA_1839.jpeg	Het_Var	5+	80-90	concordant	concordant	v0.6_Call	DEL 1:224396746-224396770	DEL	20-50	Het_Var
HG3_PB_HySA_21731	13	22	Deletion	109569380	109569402	1220	Hom_Var	8	8	1	100	5+	90-100	Hom_Var	11	13	0.846154	84.6154	Threshold2	Hom_Var	Hom_Var	10	12	0.833333	83.3333	concordant	HG3_PB_HySA_21731.jpeg	Hom_Var	5+	80-90	concordant	concordant	v0.6_Call	DEL 13:109569380-109569402	DEL	20-50	Hom_Var
HG3_10X_allpass_116	1	2410	Deletion	96139978	96142388	1293	Het_Var	8	9	0.888889	88.8889	5+	80-90	Het_Var	11	15	0.733333	73.3333	Threshold2	Het_Var	Het_Var	10	12	0.833333	83.3333	concordant	HG3_10X_allpass_116.jpeg	Het_Var	5+	80-90	concordant	concordant	v0.6_Call	DEL 1:96139978-96142388	DEL	1000-5999	Het_Var
HG4_PB_HySA_2964	2	134	Deletion	78786002	78786136	488	Het_Var	7	8	0.875	87.5	5+	80-90	Het_Var	12	14	0.857143	85.7143	Threshold2	Het_Var	Het_Var	10	12	0.833333	83.3333	concordant	HG4_PB_HySA_2964.jpeg	Het_Var	5+	80-90	concordant	concordant	v0.6_Call	DEL 2:78786002-78786136	DEL	100-300	Het_Var
HG3_PB_SVrefine2PBcRDovetail_9900	23	149	Deletion	29337502	29337651	659	Hom_Ref	2	2	1	100	2018-01-02	90-100	Hom_Ref	5	8	0.625	62.5	Threshold2	Hom_Ref	Hom_Ref	5	6	0.833333	83.3333	concordant	HG3_PB_SVrefine2PBcRDovetail_9900.jpeg	Hom_Ref	5+	80-90	concordant	concordant	v0.6_Call	DEL X:29337502-29337651	DEL	100-300	Hom_Ref
HG4_Ill_GATKHCSBGrefine_5552	7	74	Deletion	15393976	15394050	885	Hom_Ref	8	9	0.888889	88.8889	5+	80-90	Hom_Ref	11	13	0.846154	84.6154	Threshold2	Hom_Ref	Hom_Ref	11	13	0.846154	84.6154	concordant	HG4_Ill_GATKHCSBGrefine_5552.jpeg	Hom_Ref	5+	80-90	concordant	concordant	v0.6_Call	DEL 7:15393976-15394050	DEL	50-100	Hom_Ref
HG2_10X_SVrefine210Xhap12_13182	20	454	Deletion	61026582	61027036	945	Hom_Ref	8	9	0.888889	88.8889	5+	80-90	Hom_Ref	11	13	0.846154	84.6154	Threshold2	Hom_Ref	Hom_Ref	11	13	0.846154	84.6154	concordant	HG2_10X_SVrefine210Xhap12_13182.jpeg	Hom_Ref	5+	80-90	concordant	concordant	v0.6_Call	DEL 20:61026582-61027036	DEL	400-1000	Hom_Ref
HG3_Ill_Krunchall_7507	4	696	Deletion	190105445	190106141	934	Hom_Var	7	7	1	100	5+	90-100	Hom_Var	12	14	0.857143	85.7143	Threshold2	Hom_Var	Hom_Var	11	13	0.846154	84.6154	concordant	HG3_Ill_Krunchall_7507.jpeg	Hom_Var	5+	80-90	concordant	concordant	v0.6_Call	DEL 4:190105445-190106141	DEL	400-1000	Hom_Var
HG2_Ill_breakscan11_1885	12	348	Deletion	47075350	47075698	1097	Hom_Var	9	9	1	100	5+	90-100	Hom_Var	15	17	0.882353	88.2353	Threshold2	Hom_Var	Hom_Var	12	14	0.857143	85.7143	concordant	HG2_Ill_breakscan11_1885.jpeg	Hom_Var	5+	80-90	concordant	concordant	v0.6_Call	DEL 12:47075350-47075698	DEL	300-400	Hom_Var
HG4_Ill_Krunchall_7316	4	40	Deletion	133824847	133824887	1203	Hom_Var	5	5	1	100	5+	90-100	Hom_Var	7	9	0.777778	77.7778	Threshold2	Hom_Var	Hom_Var	6	7	0.857143	85.7143	concordant	HG4_Ill_Krunchall_7316.jpeg	Hom_Var	5+	80-90	concordant	concordant	v0.6_Call	DEL 4:133824847-133824887	DEL	20-50	Hom_Var
HG4_10X_allpass_1077	5	2159	Deletion	23903054	23905213	1117	Hom_Ref	3	4	0.75	75	2018-03-04	70-80	Hom_Ref	6	8	0.75	75	Threshold2	Hom_Ref	Hom_Ref	6	7	0.857143	85.7143	concordant	HG4_10X_allpass_1077.jpeg	Hom_Ref	5+	80-90	concordant	concordant	v0.6_Call	DEL 5:23903054-23905213	DEL	1000-5999	Hom_Ref
HG3_PB_assemblyticsfalcon_8133	14	317	Deletion	71437835	71438152	463	Hom_Var	8	8	1	100	5+	90-100	Hom_Var	14	16	0.875	87.5	Threshold2	Hom_Var	Hom_Var	13	15	0.866667	86.6667	concordant	HG3_PB_assemblyticsfalcon_8133.jpeg	Hom_Var	5+	80-90	concordant	concordant	v0.6_Call	DEL 14:71437835-71438152	DEL	300-400	Hom_Var
HG4_Ill_SVrefine2DISCOVARDovetail_13027	20	6397	Deletion	52285445	52291842	799	Hom_Ref	4	5	0.8	80	2018-03-04	70-80	Hom_Ref	7	8	0.875	87.5	Threshold2	Hom_Ref	Hom_Ref	7	8	0.875	87.5	concordant	HG4_Ill_SVrefine2DISCOVARDovetail_13027.jpeg	Hom_Ref	5+	80-90	concordant	concordant	v0.6_Call	DEL 20:52285445-52291842	DEL	6000+	Hom_Ref
HG2_PB_HySA_14471	7	77	Deletion	14419438	14419515	794	Hom_Var	4	4	1	100	2018-03-04	90-100	Hom_Var	8	10	0.8	80	Threshold2	Hom_Var	Hom_Var	7	8	0.875	87.5	concordant	HG2_PB_HySA_14471.jpeg	Hom_Var	5+	80-90	concordant	concordant	v0.6_Call	DEL 7:14419438-14419515	DEL	50-100	Hom_Var
HG2_PB_SVrefine2PBcRplusDovetail_6491	20	439	Deletion	44535257	44535696	64	Hom_Var	5	5	1	100	5+	90-100	Hom_Var	8	10	0.8	80	Threshold2	Hom_Var	Hom_Var	7	8	0.875	87.5	concordant	HG2_PB_SVrefine2PBcRplusDovetail_6491.jpeg	Hom_Var	5+	80-90	concordant	concordant	v0.6_Call	DEL 20:44535257-44535696	DEL	400-1000	Hom_Var
HG4_PB_HySA_14912	9	21	Deletion	37398107	37398128	228	Hom_Var	4	4	1	100	2018-03-04	90-100	Hom_Var	8	9	0.888889	88.8889	Threshold2	Hom_Var	Hom_Var	7	8	0.875	87.5	concordant	HG4_PB_HySA_14912.jpeg	Hom_Var	5+	80-90	concordant	concordant	v0.6_Call	DEL 9:37398107-37398128	DEL	20-50	Hom_Var
HG2_PB_HySA_15312	7	27	Deletion	86936003	86936030	1148	Hom_Var	4	4	1	100	2018-03-04	90-100	Hom_Var	7	8	0.875	87.5	Threshold2	Hom_Var	Hom_Var	7	8	0.875	87.5	concordant	HG2_PB_HySA_15312.jpeg	Hom_Var	5+	80-90	concordant	concordant	v0.6_Call	DEL 7:86936003-86936030	DEL	20-50	Hom_Var
HG2_PB_assemblyticsPBcR_19525	4	1632	Deletion	146438812	146440444	403	Hom_Var	5	5	1	100	5+	90-100	Hom_Var	7	8	0.875	87.5	Threshold2	Hom_Var	Hom_Var	7	8	0.875	87.5	concordant	HG2_PB_assemblyticsPBcR_19525.jpeg	Hom_Var	5+	80-90	concordant	concordant	v0.6_Call	DEL 4:146438812-146440444	DEL	1000-5999	Hom_Var
HG2_PB_SVrefine2PBcRplusDovetail_2172	12	458	Deletion	1402258	1402716	663	Het_Var	6	6	1	100	5+	90-100	Het_Var	10	11	0.909091	90.9091	Threshold2	Het_Var	Het_Var	8	9	0.888889	88.8889	concordant	HG2_PB_SVrefine2PBcRplusDovetail_2172.jpeg	Het_Var	5+	80-90	concordant	concordant	v0.6_Call	DEL 12:1402258-1402716	DEL	400-1000	Het_Var
HG3_10X_allpass_56	1	305	Deletion	46366127	46366432	242	Het_Var	5	6	0.833333	83.3333	5+	80-90	Het_Var	8	9	0.888889	88.8889	Threshold2	Het_Var	Het_Var	8	9	0.888889	88.8889	concordant	HG3_10X_allpass_56.jpeg	Het_Var	5+	80-90	concordant	concordant	v0.6_Call	DEL 1:46366127-46366432	DEL	300-400	Het_Var
HG4_PB_assemblyticsfalcon_21145	5	307	Deletion	93916298	93916605	782	Het_Var	5	5	1	100	5+	90-100	Het_Var	9	11	0.818182	81.8182	Threshold2	Het_Var	Het_Var	8	9	0.888889	88.8889	concordant	HG4_PB_assemblyticsfalcon_21145.jpeg	Het_Var	5+	80-90	concordant	concordant	v0.6_Call	DEL 5:93916298-93916605	DEL	300-400	Het_Var
HG2_Ill_150bpfermikitraw_13283	9	38	Deletion	104669420	104669458	1043	Het_Var	5	5	1	100	5+	90-100	Het_Var	9	10	0.9	90	Threshold2	Het_Var	Het_Var	8	9	0.888889	88.8889	concordant	HG2_Ill_150bpfermikitraw_13283.jpeg	Het_Var	5+	80-90	concordant	concordant	v0.6_Call	DEL 9:104669420-104669458	DEL	20-50	Het_Var
HG3_PB_SVrefine2Falcon1Dovetail_10342	17	10334	Deletion	39420771	39431105	351	Het_Var	6	6	1	100	5+	90-100	Het_Var	9	11	0.818182	81.8182	Threshold2	Het_Var	Het_Var	9	10	0.9	90	concordant	HG3_PB_SVrefine2Falcon1Dovetail_10342.jpeg	Het_Var	5+	80-90	concordant	concordant	v0.6_Call	DEL 17:39420771-39431105	DEL	6000+	Het_Var
HG3_Ill_Krunchall_19857	14	8760	Deletion	80106289	80115049	797	Het_Var	7	8	0.875	87.5	5+	80-90	Het_Var	10	13	0.769231	76.9231	Threshold2	Het_Var	Het_Var	9	10	0.9	90	concordant	HG3_Ill_Krunchall_19857.jpeg	Het_Var	5+	80-90	concordant	concordant	v0.6_Call	DEL 14:80106289-80115049	DEL	6000+	Het_Var
HG2_PB_assemblyticsfalcon_19762	4	6099	Deletion	91596798	91602897	32	Hom_Var	10	11	0.909091	90.9091	5+	90-100	Hom_Var	22	25	0.88	88	Threshold2	Hom_Var	Hom_Var	18	20	0.9	90	concordant	HG2_PB_assemblyticsfalcon_19762.jpeg	Hom_Var	5+	80-90	concordant	concordant	v0.6_Call	DEL 4:91596798-91602897	DEL	6000+	Hom_Var
HG2_10X_allpass_2032	11	6079	Deletion	93154118	93160197	742	Hom_Var	7	7	1	100	5+	90-100	Hom_Var	11	12	0.916667	91.6667	Threshold2	Hom_Var	Hom_Var	9	10	0.9	90	concordant	HG2_10X_allpass_2032.jpeg	Hom_Var	5+	80-90	concordant	concordant	v0.6_Call	DEL 11:93154118-93160197	DEL	6000+	Hom_Var
HG3_Ill_150bpfermikitraw_6067	4	52	Deletion	78199221	78199273	378	Hom_Ref	6	6	1	100	5+	90-100	Hom_Ref	10	12	0.833333	83.3333	Threshold2	Hom_Ref	Hom_Ref	9	10	0.9	90	concordant	HG3_Ill_150bpfermikitraw_6067.jpeg	Hom_Ref	5+	80-90	concordant	concordant	v0.6_Call	DEL 4:78199221-78199273	DEL	50-100	Hom_Ref
HG3_Ill_250bpfermikitraw_2595	2	52	Deletion	76946643	76946695	1137	Hom_Var	5	5	1	100	5+	90-100	Hom_Var	10	11	0.909091	90.9091	Threshold2	Hom_Var	Hom_Var	9	10	0.9	90	concordant	HG3_Ill_250bpfermikitraw_2595.jpeg	Hom_Var	5+	80-90	concordant	concordant	v0.6_Call	DEL 2:76946643-76946695	DEL	50-100	Hom_Var
HG4_Ill_scalpel_7928	7	318	Deletion	82946462	82946780	198	Het_Var	5	6	0.833333	83.3333	5+	80-90	Het_Var	9	12	0.75	75	Threshold2	Het_Var	Het_Var	9	10	0.9	90	concordant	HG4_Ill_scalpel_7928.jpeg	Het_Var	5+	80-90	concordant	concordant	v0.6_Call	DEL 7:82946462-82946780	DEL	300-400	Het_Var
HG4_Ill_scalpel_9189	8	24	Deletion	137794116	137794140	129	Het_Var	6	6	1	100	5+	90-100	Het_Var	10	11	0.909091	90.9091	Threshold2	Het_Var	Het_Var	9	10	0.9	90	concordant	HG4_Ill_scalpel_9189.jpeg	Het_Var	5+	80-90	concordant	concordant	v0.6_Call	DEL 8:137794116-137794140	DEL	20-50	Het_Var
HG2_Ill_FB_10417	11	29	Deletion	19974974	19975003	654	Het_Var	5	6	0.833333	83.3333	5+	80-90	Het_Var	11	12	0.916667	91.6667	Threshold2	Het_Var	Het_Var	9	10	0.9	90	concordant	HG2_Ill_FB_10417.jpeg	Het_Var	5+	80-90	concordant	concordant	v0.6_Call	DEL 11:19974974-19975003	DEL	20-50	Het_Var
HG3_Ill_250bpfermikitraw_7366	5	23	Deletion	6361119	6361142	494	Hom_Ref	8	8	1	100	5+	90-100	Hom_Ref	10	12	0.833333	83.3333	Threshold2	Hom_Ref	Hom_Ref	9	10	0.9	90	concordant	HG3_Ill_250bpfermikitraw_7366.jpeg	Hom_Ref	5+	80-90	concordant	concordant	v0.6_Call	DEL 5:6361119-6361142	DEL	20-50	Hom_Ref
HG2_Ill_scalpel_553	1	24	Deletion	89122946	89122970	176	Hom_Var	6	6	1	100	5+	90-100	Hom_Var	10	11	0.909091	90.9091	Threshold2	Hom_Var	Hom_Var	9	10	0.9	90	concordant	HG2_Ill_scalpel_553.jpeg	Hom_Var	5+	80-90	concordant	concordant	v0.6_Call	DEL 1:89122946-89122970	DEL	20-50	Hom_Var
HG3_Ill_GATKHC_29197	20	27	Deletion	48403313	48403340	366	Hom_Var	6	6	1	100	5+	90-100	Hom_Var	12	13	0.923077	92.3077	Threshold2	Hom_Var	Hom_Var	9	10	0.9	90	concordant	HG3_Ill_GATKHC_29197.jpeg	Hom_Var	5+	80-90	concordant	concordant	v0.6_Call	DEL 20:48403313-48403340	DEL	20-50	Hom_Var
HG4_Ill_scalpel_17320	21	44	Deletion	46926659	46926703	484	Hom_Var	7	7	1	100	5+	90-100	Hom_Var	9	10	0.9	90	Threshold2	Hom_Var	Hom_Var	9	10	0.9	90	concordant	HG4_Ill_scalpel_17320.jpeg	Hom_Var	5+	80-90	concordant	concordant	v0.6_Call	DEL 21:46926659-46926703	DEL	20-50	Hom_Var
HG3_PB_assemblyticsfalcon_8374	14	1063	Deletion	98784002	98785065	298	Het_Var	5	5	1	100	5+	90-100	Het_Var	10	12	0.833333	83.3333	Threshold2	Het_Var	Het_Var	9	10	0.9	90	concordant	HG3_PB_assemblyticsfalcon_8374.jpeg	Het_Var	5+	80-90	concordant	concordant	v0.6_Call	DEL 14:98784002-98785065	DEL	1000-5999	Het_Var
HG3_PB_assemblyticsfalcon_9216	15	1471	Deletion	98842340	98843811	890	Het_Var	5	5	1	100	5+	90-100	Het_Var	9	10	0.9	90	Threshold2	Het_Var	Het_Var	9	10	0.9	90	concordant	HG3_PB_assemblyticsfalcon_9216.jpeg	Het_Var	5+	80-90	concordant	concordant	v0.6_Call	DEL 15:98842340-98843811	DEL	1000-5999	Het_Var
HG4_Ill_MetaSV_1557	14	1435	Deletion	61058055	61059490	1259	Het_Var	6	7	0.857143	85.7143	5+	80-90	Het_Var	10	11	0.909091	90.9091	Threshold2	Het_Var	Het_Var	9	10	0.9	90	concordant	HG4_Ill_MetaSV_1557.jpeg	Het_Var	5+	80-90	concordant	concordant	v0.6_Call	DEL 14:61058055-61059490	DEL	1000-5999	Het_Var
HG2_PB_pbsv_16646	17	132	Deletion	18182782	18182914	1030	Hom_Var	6	6	1	100	5+	90-100	Hom_Var	10	11	0.909091	90.9091	Threshold2	Hom_Var	Hom_Var	9	10	0.9	90	concordant	HG2_PB_pbsv_16646.jpeg	Hom_Var	5+	80-90	concordant	concordant	v0.6_Call	DEL 17:18182782-18182914	DEL	100-300	Hom_Var
HG2_PB_SVrefine2PB10Xhap12_10658	14	42	Deletion	34013152	34013194	38	Het_Var	13	13	1	100	5+	90-100	Het_Var	21	25	0.84	84	Threshold2	Het_Var	Het_Var	19	21	0.904762	90.4762	concordant	HG2_PB_SVrefine2PB10Xhap12_10658.jpeg	Het_Var	5+	90-100	concordant	concordant	v0.6_Call	DEL 14:34013152-34013194	DEL	20-50	Het_Var
HG2_Ill_MetaSV_317	1	9611	Deletion	203935830	203945441	142	Het_Var	4	4	1	100	2018-03-04	90-100	Het_Var	11	12	0.916667	91.6667	Threshold2	Het_Var	Het_Var	10	11	0.909091	90.9091	concordant	HG2_Ill_MetaSV_317.jpeg	Het_Var	5+	90-100	concordant	concordant	v0.6_Call	DEL 1:203935830-203945441	DEL	6000+	Het_Var
HG2_Ill_svaba_19127	15	58	Deletion	50787434	50787492	1178	Hom_Var	8	8	1	100	5+	90-100	Hom_Var	11	12	0.916667	91.6667	Threshold2	Hom_Var	Hom_Var	10	11	0.909091	90.9091	concordant	HG2_Ill_svaba_19127.jpeg	Hom_Var	5+	90-100	concordant	concordant	v0.6_Call	DEL 15:50787434-50787492	DEL	50-100	Hom_Var
HG3_Ill_MetaSV_4895	7	658	Deletion	64413375	64414033	452	Het_Var	8	8	1	100	5+	90-100	Het_Var	12	13	0.923077	92.3077	Threshold2	Het_Var	Het_Var	10	11	0.909091	90.9091	concordant	HG3_Ill_MetaSV_4895.jpeg	Het_Var	5+	90-100	concordant	concordant	v0.6_Call	DEL 7:64413375-64414033	DEL	400-1000	Het_Var
HG3_Ill_GATKHCSBGrefine_5585	7	319	Deletion	68462070	68462389	155	Hom_Var	6	6	1	100	5+	90-100	Hom_Var	10	11	0.909091	90.9091	Threshold2	Hom_Var	Hom_Var	10	11	0.909091	90.9091	concordant	HG3_Ill_GATKHCSBGrefine_5585.jpeg	Hom_Var	5+	90-100	concordant	concordant	v0.6_Call	DEL 7:68462070-68462389	DEL	300-400	Hom_Var
HG4_PB_assemblyticsfalcon_8705	15	301	Deletion	58596507	58596808	495	Hom_Var	6	6	1	100	5+	90-100	Hom_Var	11	12	0.916667	91.6667	Threshold2	Hom_Var	Hom_Var	10	11	0.909091	90.9091	concordant	HG4_PB_assemblyticsfalcon_8705.jpeg	Hom_Var	5+	90-100	concordant	concordant	v0.6_Call	DEL 15:58596507-58596808	DEL	300-400	Hom_Var
HG3_Ill_Krunchall_17562	12	347	Deletion	47075365	47075712	1025	Hom_Var	7	7	1	100	5+	90-100	Hom_Var	10	11	0.909091	90.9091	Threshold2	Hom_Var	Hom_Var	10	11	0.909091	90.9091	concordant	HG3_Ill_Krunchall_17562.jpeg	Hom_Var	5+	90-100	concordant	concordant	v0.6_Call	DEL 12:47075365-47075712	DEL	300-400	Hom_Var
HG4_Ill_Krunchall_8666	5	20	Deletion	75280384	75280404	673	Hom_Ref	7	7	1	100	5+	90-100	Hom_Ref	11	13	0.846154	84.6154	Threshold2	Hom_Ref	Hom_Ref	10	11	0.909091	90.9091	concordant	HG4_Ill_Krunchall_8666.jpeg	Hom_Ref	5+	90-100	concordant	concordant	v0.6_Call	DEL 5:75280384-75280404	DEL	20-50	Hom_Ref
HG3_Ill_Krunchall_6075	4	50	Deletion	37739609	37739659	1079	Hom_Var	7	7	1	100	5+	90-100	Hom_Var	11	13	0.846154	84.6154	Threshold2	Hom_Var	Hom_Var	10	11	0.909091	90.9091	concordant	HG3_Ill_Krunchall_6075.jpeg	Hom_Var	5+	90-100	concordant	concordant	v0.6_Call	DEL 4:37739609-37739659	DEL	20-50	Hom_Var
HG2_Ill_MetaSV_2896	20	1198	Deletion	42024594	42025792	457	Hom_Var	7	7	1	100	5+	90-100	Hom_Var	11	13	0.846154	84.6154	Threshold2	Hom_Var	Hom_Var	10	11	0.909091	90.9091	concordant	HG2_Ill_MetaSV_2896.jpeg	Hom_Var	5+	90-100	concordant	concordant	v0.6_Call	DEL 20:42024594-42025792	DEL	1000-5999	Hom_Var
HG4_PB_pbsv_1150	1	1941	Deletion	213084212	213086153	968	Hom_Var	7	7	1	100	5+	90-100	Hom_Var	12	13	0.923077	92.3077	Threshold2	Hom_Var	Hom_Var	10	11	0.909091	90.9091	concordant	HG4_PB_pbsv_1150.jpeg	Hom_Var	5+	90-100	concordant	concordant	v0.6_Call	DEL 1:213084212-213086153	DEL	1000-5999	Hom_Var
HG4_PB_pbsv_16537	17	6121	Deletion	12353133	12359254	375	Het_Var	6	6	1	100	5+	90-100	Het_Var	12	13	0.923077	92.3077	Threshold2	Het_Var	Het_Var	11	12	0.916667	91.6667	concordant	HG4_PB_pbsv_16537.jpeg	Het_Var	5+	90-100	concordant	concordant	v0.6_Call	DEL 17:12353133-12359254	DEL	6000+	Het_Var
HG2_PB_SVrefine2PB10Xhap12_3301	4	6042	Deletion	59944554	59950596	933	Het_Var	6	6	1	100	5+	90-100	Het_Var	11	13	0.846154	84.6154	Threshold2	Het_Var	Het_Var	11	12	0.916667	91.6667	concordant	HG2_PB_SVrefine2PB10Xhap12_3301.jpeg	Het_Var	5+	90-100	concordant	concordant	v0.6_Call	DEL 4:59944554-59950596	DEL	6000+	Het_Var
HG4_Ill_svaba_16331	12	89	Deletion	30500336	30500425	528	Het_Var	6	7	0.857143	85.7143	5+	80-90	Het_Var	12	13	0.923077	92.3077	Threshold2	Het_Var	Het_Var	11	12	0.916667	91.6667	concordant	HG4_Ill_svaba_16331.jpeg	Het_Var	5+	90-100	concordant	concordant	v0.6_Call	DEL 12:30500336-30500425	DEL	50-100	Het_Var
HG3_PB_pbsv_10286	9	59	Deletion	122278160	122278219	1010	Het_Var	7	7	1	100	5+	90-100	Het_Var	11	13	0.846154	84.6154	Threshold2	Het_Var	Het_Var	11	12	0.916667	91.6667	concordant	HG3_PB_pbsv_10286.jpeg	Het_Var	5+	90-100	concordant	concordant	v0.6_Call	DEL 9:122278160-122278219	DEL	50-100	Het_Var
HG2_PB_SVrefine2PBcRplusDovetail_6596	20	305	Deletion	60526288	60526593	905	Het_Var	6	6	1	100	5+	90-100	Het_Var	11	12	0.916667	91.6667	Threshold2	Het_Var	Het_Var	11	12	0.916667	91.6667	concordant	HG2_PB_SVrefine2PBcRplusDovetail_6596.jpeg	Het_Var	5+	90-100	concordant	concordant	v0.6_Call	DEL 20:60526288-60526593	DEL	300-400	Het_Var
HG4_PB_assemblyticsfalcon_4639	11	310	Deletion	99276337	99276647	1214	Hom_Var	8	8	1	100	5+	90-100	Hom_Var	12	14	0.857143	85.7143	Threshold2	Hom_Var	Hom_Var	11	12	0.916667	91.6667	concordant	HG4_PB_assemblyticsfalcon_4639.jpeg	Hom_Var	5+	90-100	concordant	concordant	v0.6_Call	DEL 11:99276337-99276647	DEL	300-400	Hom_Var
HG2_Ill_Krunchall_11173	7	32	Deletion	15237867	15237899	371	Het_Var	7	7	1	100	5+	90-100	Het_Var	12	15	0.8	80	Threshold2	Het_Var	Het_Var	11	12	0.916667	91.6667	concordant	HG2_Ill_Krunchall_11173.jpeg	Het_Var	5+	90-100	concordant	concordant	v0.6_Call	DEL 7:15237867-15237899	DEL	20-50	Het_Var
HG2_10X_allpass_2933	22	2887	Deletion	33780445	33783332	376	Het_Var	9	9	1	100	5+	90-100	Het_Var	12	13	0.923077	92.3077	Threshold2	Het_Var	Het_Var	11	12	0.916667	91.6667	concordant	HG2_10X_allpass_2933.jpeg	Het_Var	5+	90-100	concordant	concordant	v0.6_Call	DEL 22:33780445-33783332	DEL	1000-5999	Het_Var
HG2_PB_assemblyticsfalcon_16688	22	2304	Deletion	29633086	29635390	1011	Het_Var	6	6	1	100	5+	90-100	Het_Var	12	13	0.923077	92.3077	Threshold2	Het_Var	Het_Var	11	12	0.916667	91.6667	concordant	HG2_PB_assemblyticsfalcon_16688.jpeg	Het_Var	5+	90-100	concordant	concordant	v0.6_Call	DEL 22:29633086-29635390	DEL	1000-5999	Het_Var
HG4_PB_assemblyticsfalcon_19432	4	2798	Deletion	106940467	106943265	208	Hom_Ref	8	8	1	100	5+	90-100	Hom_Ref	12	14	0.857143	85.7143	Threshold2	Hom_Ref	Hom_Ref	11	12	0.916667	91.6667	concordant	HG4_PB_assemblyticsfalcon_19432.jpeg	Hom_Ref	5+	90-100	concordant	concordant	v0.6_Call	DEL 4:106940467-106943265	DEL	1000-5999	Hom_Ref
HG3_Ill_MetaSV_2000	17	1655	Deletion	136726	138381	361	Hom_Var	8	8	1	100	5+	90-100	Hom_Var	12	13	0.923077	92.3077	Threshold2	Hom_Var	Hom_Var	11	12	0.916667	91.6667	concordant	HG3_Ill_MetaSV_2000.jpeg	Hom_Var	5+	90-100	concordant	concordant	v0.6_Call	DEL 17:136726-138381	DEL	1000-5999	Hom_Var
HG3_PB_assemblyticsfalcon_21918	5	1542	Deletion	136854724	136856266	778	Hom_Var	8	8	1	100	5+	90-100	Hom_Var	12	13	0.923077	92.3077	Threshold2	Hom_Var	Hom_Var	11	12	0.916667	91.6667	concordant	HG3_PB_assemblyticsfalcon_21918.jpeg	Hom_Var	5+	90-100	concordant	concordant	v0.6_Call	DEL 5:136854724-136856266	DEL	1000-5999	Hom_Var
HG2_PB_pbsv_5996	5	2362	Deletion	98345116	98347478	873	Hom_Var	8	8	1	100	5+	90-100	Hom_Var	13	14	0.928571	92.8571	Threshold2	Hom_Var	Hom_Var	11	12	0.916667	91.6667	concordant	HG2_PB_pbsv_5996.jpeg	Hom_Var	5+	90-100	concordant	concordant	v0.6_Call	DEL 5:98345116-98347478	DEL	1000-5999	Hom_Var
HG2_Ill_GATKHCSBGrefine_553	1	2231	Deletion	156526704	156528935	938	Hom_Var	7	7	1	100	5+	90-100	Hom_Var	14	15	0.933333	93.3333	Threshold2	Hom_Var	Hom_Var	11	12	0.916667	91.6667	concordant	HG2_Ill_GATKHCSBGrefine_553.jpeg	Hom_Var	5+	90-100	concordant	concordant	v0.6_Call	DEL 1:156526704-156528935	DEL	1000-5999	Hom_Var
HG2_Ill_scalpel_5594	5	153	Deletion	37415489	37415642	8	Het_Var	16	16	1	100	5+	90-100	Het_Var	27	33	0.818182	81.8182	Threshold2	Het_Var	Het_Var	22	24	0.916667	91.6667	concordant	HG2_Ill_scalpel_5594.jpeg	Het_Var	5+	90-100	concordant	concordant	v0.6_Call	DEL 5:37415489-37415642	DEL	100-300	Het_Var
HG2_Ill_tnscope_80	1	6051	Deletion	114039827	114045878	395	Het_Var	8	8	1	100	5+	90-100	Het_Var	12	13	0.923077	92.3077	Threshold2	Het_Var	Het_Var	12	13	0.923077	92.3077	concordant	HG2_Ill_tnscope_80.jpeg	Het_Var	5+	90-100	concordant	concordant	v0.6_Call	DEL 1:114039827-114045878	DEL	6000+	Het_Var
HG2_PB_HySA_15429	7	13145	Deletion	100327573	100340718	994	Het_Var	6	6	1	100	5+	90-100	Het_Var	13	15	0.866667	86.6667	Threshold2	Het_Var	Het_Var	12	13	0.923077	92.3077	concordant	HG2_PB_HySA_15429.jpeg	Het_Var	5+	90-100	concordant	concordant	v0.6_Call	DEL 7:100327573-100340718	DEL	6000+	Het_Var
HG2_Ill_SVrefine2DISCOVARplusDovetail_3740	14	509	Deletion	39004518	39005027	614	Het_Var	8	9	0.888889	88.8889	5+	80-90	Het_Var	15	16	0.9375	93.75	Threshold2	Het_Var	Het_Var	12	13	0.923077	92.3077	concordant	HG2_Ill_SVrefine2DISCOVARplusDovetail_3740.jpeg	Het_Var	5+	90-100	concordant	concordant	v0.6_Call	DEL 14:39004518-39005027	DEL	400-1000	Het_Var
HG4_10X_allpass_225	1	767	Deletion	239385034	239385801	953	Hom_Ref	9	10	0.9	90	5+	80-90	Hom_Ref	13	14	0.928571	92.8571	Threshold2	Hom_Ref	Hom_Ref	12	13	0.923077	92.3077	concordant	HG4_10X_allpass_225.jpeg	Hom_Ref	5+	90-100	concordant	concordant	v0.6_Call	DEL 1:239385034-239385801	DEL	400-1000	Hom_Ref
HG2_CG_vcfBeta_2914	4	20	Deletion	133505738	133505758	524	Het_Var	9	9	1	100	5+	90-100	Het_Var	15	16	0.9375	93.75	Threshold2	Het_Var	Het_Var	12	13	0.923077	92.3077	concordant	HG2_CG_vcfBeta_2914.jpeg	Het_Var	5+	90-100	concordant	concordant	v0.6_Call	DEL 4:133505738-133505758	DEL	20-50	Het_Var
HG4_PB_SVrefine2PBcRDovetail_282	1	3855	Deletion	56831106	56834961	564	Het_Var	7	7	1	100	5+	90-100	Het_Var	12	14	0.857143	85.7143	Threshold2	Het_Var	Het_Var	12	13	0.923077	92.3077	concordant	HG4_PB_SVrefine2PBcRDovetail_282.jpeg	Het_Var	5+	90-100	concordant	concordant	v0.6_Call	DEL 1:56831106-56834961	DEL	1000-5999	Het_Var
HG3_Ill_Krunchall_11789	7	1121	Deletion	120290250	120291371	1217	Hom_Ref	7	7	1	100	5+	90-100	Hom_Ref	13	15	0.866667	86.6667	Threshold2	Hom_Ref	Hom_Ref	12	13	0.923077	92.3077	concordant	HG3_Ill_Krunchall_11789.jpeg	Hom_Ref	5+	90-100	concordant	concordant	v0.6_Call	DEL 7:120290250-120291371	DEL	1000-5999	Hom_Ref
HG2_PB_pbsv_9760	8	6012	Deletion	126595118	126601130	264	Hom_Var	7	8	0.875	87.5	5+	80-90	Hom_Var	14	16	0.875	87.5	Threshold2	Hom_Var	Hom_Var	13	14	0.928571	92.8571	concordant	HG2_PB_pbsv_9760.jpeg	Hom_Var	5+	90-100	concordant	concordant	v0.6_Call	DEL 8:126595118-126601130	DEL	6000+	Hom_Var
HG4_Ill_Krunchall_14508	9	61	Deletion	78262256	78262317	647	Hom_Ref	9	9	1	100	5+	90-100	Hom_Ref	14	16	0.875	87.5	Threshold2	Hom_Ref	Hom_Ref	13	14	0.928571	92.8571	concordant	HG4_Ill_Krunchall_14508.jpeg	Hom_Ref	5+	90-100	concordant	concordant	v0.6_Call	DEL 9:78262256-78262317	DEL	50-100	Hom_Ref
HG3_Ill_FB_820	1	21	Deletion	167781426	167781447	493	Het_Var	8	8	1	100	5+	90-100	Het_Var	15	16	0.9375	93.75	Threshold2	Het_Var	Het_Var	13	14	0.928571	92.8571	concordant	HG3_Ill_FB_820.jpeg	Het_Var	5+	90-100	concordant	concordant	v0.6_Call	DEL 1:167781426-167781447	DEL	20-50	Het_Var
HG3_Ill_150bpfermikitraw_8539	5	20	Deletion	179596801	179596821	616	Het_Var	10	10	1	100	5+	90-100	Het_Var	16	17	0.941176	94.1176	Threshold2	Het_Var	Het_Var	13	14	0.928571	92.8571	concordant	HG3_Ill_150bpfermikitraw_8539.jpeg	Het_Var	5+	90-100	concordant	concordant	v0.6_Call	DEL 5:179596801-179596821	DEL	20-50	Het_Var
HG2_10X_SVrefine210Xhap12_3759	4	4291	Deletion	172988640	172992931	235	Hom_Var	9	9	1	100	5+	90-100	Hom_Var	13	16	0.8125	81.25	Threshold2	Hom_Var	Hom_Var	13	14	0.928571	92.8571	concordant	HG2_10X_SVrefine210Xhap12_3759.jpeg	Hom_Var	5+	90-100	concordant	concordant	v0.6_Call	DEL 4:172988640-172992931	DEL	1000-5999	Hom_Var
HG2_Ill_GATKHCSBGrefine_3108	4	6056	Deletion	75642743	75648799	637	Hom_Var	8	9	0.888889	88.8889	5+	80-90	Hom_Var	15	16	0.9375	93.75	Threshold2	Hom_Var	Hom_Var	14	15	0.933333	93.3333	concordant	HG2_Ill_GATKHCSBGrefine_3108.jpeg	Hom_Var	5+	90-100	concordant	concordant	v0.6_Call	DEL 4:75642743-75648799	DEL	6000+	Hom_Var
HG2_10X_SVrefine210Xhap12_3215	4	436	Deletion	31492863	31493299	645	Hom_Var	9	9	1	100	5+	90-100	Hom_Var	17	18	0.944444	94.4444	Threshold2	Hom_Var	Hom_Var	14	15	0.933333	93.3333	concordant	HG2_10X_SVrefine210Xhap12_3215.jpeg	Hom_Var	5+	90-100	concordant	concordant	v0.6_Call	DEL 4:31492863-31493299	DEL	400-1000	Hom_Var
HG3_PB_HySA_23831	16	30	Deletion	1122006	1122036	175	Het_Var	11	11	1	100	5+	90-100	Het_Var	14	15	0.933333	93.3333	Threshold2	Het_Var	Het_Var	14	15	0.933333	93.3333	concordant	HG3_PB_HySA_23831.jpeg	Het_Var	5+	90-100	concordant	concordant	v0.6_Call	DEL 16:1122006-1122036	DEL	20-50	Het_Var
HG2_Ill_GATKHC_19359	11	24	Deletion	20172662	20172686	266	Hom_Var	10	10	1	100	5+	90-100	Hom_Var	15	17	0.882353	88.2353	Threshold2	Hom_Var	Hom_Var	14	15	0.933333	93.3333	concordant	HG2_Ill_GATKHC_19359.jpeg	Hom_Var	5+	90-100	concordant	concordant	v0.6_Call	DEL 11:20172662-20172686	DEL	20-50	Hom_Var
HG4_Ill_scalpel_6010	5	312	Deletion	142935366	142935678	3	Het_Var	23	24	0.958333	95.8333	5+	90-100	Het_Var	46	53	0.867925	86.7925	Threshold2	Het_Var	Het_Var	33	35	0.942857	94.2857	concordant	HG4_Ill_scalpel_6010.jpeg	Het_Var	5+	90-100	concordant	concordant	v0.6_Call	DEL 5:142935366-142935678	DEL	300-400	Het_Var
HG2_Ill_GATKHC_23326	14	35	Deletion	27770744	27770779	28	Het_Var	13	13	1	100	5+	90-100	Het_Var	20	24	0.833333	83.3333	Threshold2	Het_Var	Het_Var	18	19	0.947368	94.7368	concordant	HG2_Ill_GATKHC_23326.jpeg	Het_Var	5+	90-100	concordant	concordant	v0.6_Call	DEL 14:27770744-27770779	DEL	20-50	Het_Var
HG2_PB_assemblyticsfalcon_9238	15	1480	Deletion	98842326	98843806	39	Het_Var	14	15	0.933333	93.3333	5+	90-100	Het_Var	25	28	0.892857	89.2857	Threshold2	Het_Var	Het_Var	21	22	0.954545	95.4545	concordant	HG2_PB_assemblyticsfalcon_9238.jpeg	Het_Var	5+	90-100	concordant	concordant	v0.6_Call	DEL 15:98842326-98843806	DEL	1000-5999	Het_Var
HG4_Ill_MetaSV_415	1	1108	Deletion	243782743	243783851	30	Hom_Var	15	16	0.9375	93.75	5+	90-100	Hom_Var	28	29	0.965517	96.5517	Threshold2	Hom_Var	Hom_Var	23	24	0.958333	95.8333	concordant	HG4_Ill_MetaSV_415.jpeg	Hom_Var	5+	90-100	concordant	concordant	v0.6_Call	DEL 1:243782743-243783851	DEL	1000-5999	Hom_Var
HG3_PB_HySA_27841	20	288	Deletion	39886355	39886643	33	Het_Var	16	16	1	100	5+	90-100	Het_Var	28	31	0.903226	90.3226	Threshold2	Het_Var	Het_Var	24	25	0.96	96	concordant	HG3_PB_HySA_27841.jpeg	Het_Var	5+	90-100	concordant	concordant	v0.6_Call	DEL 20:39886355-39886643	DEL	100-300	Het_Var
HG2_PB_HySA_18990	9	789	Deletion	104569695	104570484	4	Het_Var	17	18	0.944444	94.4444	5+	90-100	Het_Var	38	45	0.844444	84.4444	Threshold2	Het_Var	Het_Var	26	27	0.962963	96.2963	concordant	HG2_PB_HySA_18990.jpeg	Het_Var	5+	90-100	concordant	concordant	v0.6_Call	DEL 9:104569695-104570484	DEL	400-1000	Het_Var
HG2_PB_SVrefine2PB10Xhap12_9431	12	331	Deletion	27433987	27434318	2	Het_Var	25	25	1	100	5+	90-100	Het_Var	48	57	0.842105	84.2105	Threshold2	Het_Var	Het_Var	35	36	0.972222	97.2222	concordant	HG2_PB_SVrefine2PB10Xhap12_9431.jpeg	Het_Var	5+	90-100	concordant	concordant	v0.6_Call	DEL 12:27433987-27434318	DEL	300-400	Het_Var
HG2_PB_assemblyticsPBcR_19238	4	6782	Deletion	107056579	107063361	124	Het_Var	5	5	1	100	5+	90-100	Het_Var	10	11	0.909091	90.9091	Threshold2	Het_Var	Het_Var	10	10	1	100	concordant	HG2_PB_assemblyticsPBcR_19238.jpeg	Het_Var	5+	90-100	concordant	concordant	v0.6_Call	DEL 4:107056579-107063361	DEL	6000+	Het_Var
HG4_Ill_Krunchall_17944	12	10985	Deletion	12531473	12542458	239	Het_Var	7	7	1	100	5+	90-100	Het_Var	11	12	0.916667	91.6667	Threshold2	Het_Var	Het_Var	11	11	1	100	concordant	HG4_Ill_Krunchall_17944.jpeg	Het_Var	5+	90-100	concordant	concordant	v0.6_Call	DEL 12:12531473-12542458	DEL	6000+	Het_Var
HG4_Ill_Krunchall_6641	4	6041	Deletion	59944564	59950605	249	Het_Var	9	9	1	100	5+	90-100	Het_Var	13	13	1	100	Threshold2	Het_Var	Het_Var	12	12	1	100	concordant	HG4_Ill_Krunchall_6641.jpeg	Het_Var	5+	90-100	concordant	concordant	v0.6_Call	DEL 4:59944564-59950605	DEL	6000+	Het_Var
HG2_10X_allpass_2130	12	10790	Deletion	59935801	59946591	279	Het_Var	8	8	1	100	5+	90-100	Het_Var	11	12	0.916667	91.6667	Threshold2	Het_Var	Het_Var	11	11	1	100	concordant	HG2_10X_allpass_2130.jpeg	Het_Var	5+	90-100	concordant	concordant	v0.6_Call	DEL 12:59935801-59946591	DEL	6000+	Het_Var
HG2_Ill_tnscope_701	5	6053	Deletion	103854273	103860326	489	Het_Var	5	5	1	100	5+	90-100	Het_Var	9	9	1	100	Threshold2	Het_Var	Het_Var	8	8	1	100	concordant	HG2_Ill_tnscope_701.jpeg	Het_Var	5+	90-100	concordant	concordant	v0.6_Call	DEL 5:103854273-103860326	DEL	6000+	Het_Var
HG4_Ill_GATKHCSBGrefine_387	1	6191	Deletion	81404757	81410948	509	Het_Var	8	8	1	100	5+	90-100	Het_Var	13	15	0.866667	86.6667	Threshold2	Het_Var	Het_Var	12	12	1	100	concordant	HG4_Ill_GATKHCSBGrefine_387.jpeg	Het_Var	5+	90-100	concordant	concordant	v0.6_Call	DEL 1:81404757-81410948	DEL	6000+	Het_Var
HG2_Ill_MetaSV_1506	14	8761	Deletion	80106288	80115049	587	Het_Var	7	7	1	100	5+	90-100	Het_Var	13	14	0.928571	92.8571	Threshold2	Het_Var	Het_Var	12	12	1	100	concordant	HG2_Ill_MetaSV_1506.jpeg	Het_Var	5+	90-100	concordant	concordant	v0.6_Call	DEL 14:80106288-80115049	DEL	6000+	Het_Var
HG2_Ill_tnscope_706	5	9637	Deletion	114325286	114334923	642	Het_Var	5	5	1	100	5+	90-100	Het_Var	11	12	0.916667	91.6667	Threshold2	Het_Var	Het_Var	11	11	1	100	concordant	HG2_Ill_tnscope_706.jpeg	Het_Var	5+	90-100	concordant	concordant	v0.6_Call	DEL 5:114325286-114334923	DEL	6000+	Het_Var
HG2_Ill_tnscope_530	4	6783	Deletion	107056578	107063361	731	Het_Var	11	11	1	100	5+	90-100	Het_Var	16	17	0.941176	94.1176	Threshold2	Het_Var	Het_Var	16	16	1	100	concordant	HG2_Ill_tnscope_530.jpeg	Het_Var	5+	90-100	concordant	concordant	v0.6_Call	DEL 4:107056578-107063361	DEL	6000+	Het_Var
HG3_Ill_MetaSV_3797	4	6137	Deletion	88268242	88274379	911	Het_Var	6	6	1	100	5+	90-100	Het_Var	10	10	1	100	Threshold2	Het_Var	Het_Var	9	9	1	100	concordant	HG3_Ill_MetaSV_3797.jpeg	Het_Var	5+	90-100	concordant	concordant	v0.6_Call	DEL 4:88268242-88274379	DEL	6000+	Het_Var
HG3_10X_allpass_909	4	6052	Deletion	88268255	88274307	1102	Het_Var	9	9	1	100	5+	90-100	Het_Var	13	14	0.928571	92.8571	Threshold2	Het_Var	Het_Var	13	13	1	100	concordant	HG3_10X_allpass_909.jpeg	Het_Var	5+	90-100	concordant	concordant	v0.6_Call	DEL 4:88268255-88274307	DEL	6000+	Het_Var
HG2_Ill_Krunchall_7622	4	6273	Deletion	190058014	190064287	1118	Het_Var	9	9	1	100	5+	90-100	Het_Var	14	15	0.933333	93.3333	Threshold2	Het_Var	Het_Var	12	12	1	100	concordant	HG2_Ill_Krunchall_7622.jpeg	Het_Var	5+	90-100	concordant	concordant	v0.6_Call	DEL 4:190058014-190064287	DEL	6000+	Het_Var
HG3_PB_SVrefine2Falcon1Dovetail_329	1	6107	Deletion	62113413	62119520	1272	Het_Var	6	6	1	100	5+	90-100	Het_Var	10	12	0.833333	83.3333	Threshold2	Het_Var	Het_Var	10	10	1	100	concordant	HG3_PB_SVrefine2Falcon1Dovetail_329.jpeg	Het_Var	5+	90-100	concordant	concordant	v0.6_Call	DEL 1:62113413-62119520	DEL	6000+	Het_Var
HG4_PB_pbsv_5646	5	9505	Deletion	12811033	12820538	313	Hom_Ref	7	7	1	100	5+	90-100	Hom_Ref	11	11	1	100	Threshold2	Hom_Ref	Hom_Ref	11	11	1	100	concordant	HG4_PB_pbsv_5646.jpeg	Hom_Ref	5+	90-100	concordant	concordant	v0.6_Call	DEL 5:12811033-12820538	DEL	6000+	Hom_Ref
HG2_Ill_GATKHCSBGrefine_5868	7	6046	Deletion	113416161	113422207	56	Hom_Var	7	7	1	100	5+	90-100	Hom_Var	12	12	1	100	Threshold2	Hom_Var	Hom_Var	11	11	1	100	concordant	HG2_Ill_GATKHCSBGrefine_5868.jpeg	Hom_Var	5+	90-100	concordant	concordant	v0.6_Call	DEL 7:113416161-113422207	DEL	6000+	Hom_Var
HG3_Ill_Krunchall_20652	15	6047	Deletion	83551605	83557652	121	Hom_Var	6	6	1	100	5+	90-100	Hom_Var	12	12	1	100	Threshold2	Hom_Var	Hom_Var	12	12	1	100	concordant	HG3_Ill_Krunchall_20652.jpeg	Hom_Var	5+	90-100	concordant	concordant	v0.6_Call	DEL 15:83551605-83557652	DEL	6000+	Hom_Var
HG2_PB_SVrefine2Falcon1plusDovetail_12052	8	6102	Deletion	135082913	135089015	454	Hom_Var	4	4	1	100	2018-03-04	90-100	Hom_Var	9	9	1	100	Threshold2	Hom_Var	Hom_Var	8	8	1	100	concordant	HG2_PB_SVrefine2Falcon1plusDovetail_12052.jpeg	Hom_Var	5+	90-100	concordant	concordant	v0.6_Call	DEL 8:135082913-135089015	DEL	6000+	Hom_Var
HG3_PB_SVrefine2PBcRDovetail_2886	5	6034	Deletion	151456413	151462447	593	Hom_Var	7	7	1	100	5+	90-100	Hom_Var	13	13	1	100	Threshold2	Hom_Var	Hom_Var	12	12	1	100	concordant	HG3_PB_SVrefine2PBcRDovetail_2886.jpeg	Hom_Var	5+	90-100	concordant	concordant	v0.6_Call	DEL 5:151456413-151462447	DEL	6000+	Hom_Var
HG3_10X_allpass_1173	5	6092	Deletion	57680001	57686093	688	Hom_Var	8	8	1	100	5+	90-100	Hom_Var	12	12	1	100	Threshold2	Hom_Var	Hom_Var	12	12	1	100	concordant	HG3_10X_allpass_1173.jpeg	Hom_Var	5+	90-100	concordant	concordant	v0.6_Call	DEL 5:57680001-57686093	DEL	6000+	Hom_Var
HG3_10X_allpass_891	4	6106	Deletion	75642742	75648848	1034	Hom_Var	5	5	1	100	5+	90-100	Hom_Var	9	9	1	100	Threshold2	Hom_Var	Hom_Var	8	8	1	100	concordant	HG3_10X_allpass_891.jpeg	Hom_Var	5+	90-100	concordant	concordant	v0.6_Call	DEL 4:75642742-75648848	DEL	6000+	Hom_Var
HG4_PB_assemblyticsfalcon_28517	23	6174	Deletion	83446859	83453033	1091	Hom_Var	4	4	1	100	2018-03-04	90-100	Hom_Var	7	7	1	100	Threshold2	Hom_Var	Hom_Var	6	6	1	100	concordant	HG4_PB_assemblyticsfalcon_28517.jpeg	Hom_Var	5+	90-100	concordant	concordant	v0.6_Call	DEL X:83446859-83453033	DEL	6000+	Hom_Var
HG2_Ill_SVrefine2DISCOVARplusDovetail_9919	4	6035	Deletion	167677025	167683060	1202	Hom_Var	8	8	1	100	5+	90-100	Hom_Var	12	12	1	100	Threshold2	Hom_Var	Hom_Var	12	12	1	100	concordant	HG2_Ill_SVrefine2DISCOVARplusDovetail_9919.jpeg	Hom_Var	5+	90-100	concordant	concordant	v0.6_Call	DEL 4:167677025-167683060	DEL	6000+	Hom_Var
HG4_PB_SVrefine2Falcon1Dovetail_7483	11	6101	Deletion	47057589	47063690	1273	Hom_Var	6	6	1	100	5+	90-100	Hom_Var	8	11	0.727273	72.7273	Threshold2	Hom_Var	Hom_Var	8	8	1	100	concordant	HG4_PB_SVrefine2Falcon1Dovetail_7483.jpeg	Hom_Var	5+	90-100	concordant	concordant	v0.6_Call	DEL 11:47057589-47063690	DEL	6000+	Hom_Var
HG2_Ill_Krunchall_8774	5	85	Deletion	123675103	123675188	201	Het_Var	7	7	1	100	5+	90-100	Het_Var	10	10	1	100	Threshold2	Het_Var	Het_Var	10	10	1	100	concordant	HG2_Ill_Krunchall_8774.jpeg	Het_Var	5+	90-100	concordant	concordant	v0.6_Call	DEL 5:123675103-123675188	DEL	50-100	Het_Var
HG3_Ill_manta_16	1	53	Deletion	7039852	7039905	443	Het_Var	7	7	1	100	5+	90-100	Het_Var	12	12	1	100	Threshold2	Het_Var	Het_Var	11	11	1	100	concordant	HG3_Ill_manta_16.jpeg	Het_Var	5+	90-100	concordant	concordant	v0.6_Call	DEL 1:7039852-7039905	DEL	50-100	Het_Var
HG2_PB_HySA_29607	16	93	Deletion	81619272	81619365	652	Het_Var	6	6	1	100	5+	90-100	Het_Var	13	13	1	100	Threshold2	Het_Var	Het_Var	10	10	1	100	concordant	HG2_PB_HySA_29607.jpeg	Het_Var	5+	90-100	concordant	concordant	v0.6_Call	DEL 16:81619272-81619365	DEL	50-100	Het_Var
HG2_Ill_breakscan11_1474	9	60	Deletion	27420861	27420921	944	Het_Var	9	9	1	100	5+	90-100	Het_Var	16	18	0.888889	88.8889	Threshold2	Het_Var	Het_Var	15	15	1	100	concordant	HG2_Ill_breakscan11_1474.jpeg	Het_Var	5+	90-100	concordant	concordant	v0.6_Call	DEL 9:27420861-27420921	DEL	50-100	Het_Var
HG2_Ill_SVrefine2DISCOVARplusDovetail_947	1	65	Deletion	217269958	217270023	1155	Het_Var	9	9	1	100	5+	90-100	Het_Var	14	14	1	100	Threshold2	Het_Var	Het_Var	13	13	1	100	concordant	HG2_Ill_SVrefine2DISCOVARplusDovetail_947.jpeg	Het_Var	5+	90-100	concordant	concordant	v0.6_Call	DEL 1:217269958-217270023	DEL	50-100	Het_Var
HG2_10X_SVrefine210Xhap12_461	1	97	Deletion	79170860	79170957	849	Hom_Ref	9	9	1	100	5+	90-100	Hom_Ref	14	14	1	100	Threshold2	Hom_Ref	Hom_Ref	14	14	1	100	concordant	HG2_10X_SVrefine210Xhap12_461.jpeg	Hom_Ref	5+	90-100	concordant	concordant	v0.6_Call	DEL 1:79170860-79170957	DEL	50-100	Hom_Ref
HG2_10X_SVrefine210Xhap12_8695	11	54	Deletion	70146104	70146158	882	Hom_Ref	6	6	1	100	5+	90-100	Hom_Ref	9	10	0.9	90	Threshold2	Hom_Ref	Hom_Ref	8	8	1	100	concordant	HG2_10X_SVrefine210Xhap12_8695.jpeg	Hom_Ref	5+	90-100	concordant	concordant	v0.6_Call	DEL 11:70146104-70146158	DEL	50-100	Hom_Ref
HG2_Ill_breakscan11_2331	16	55	Deletion	88576040	88576095	936	Hom_Ref	11	11	1	100	5+	90-100	Hom_Ref	15	15	1	100	Threshold2	Hom_Ref	Hom_Ref	15	15	1	100	concordant	HG2_Ill_breakscan11_2331.jpeg	Hom_Ref	5+	90-100	concordant	concordant	v0.6_Call	DEL 16:88576040-88576095	DEL	50-100	Hom_Ref
HG4_Ill_manta_133	1	58	Deletion	83149851	83149909	128	Hom_Var	6	6	1	100	5+	90-100	Hom_Var	9	9	1	100	Threshold2	Hom_Var	Hom_Var	9	9	1	100	concordant	HG4_Ill_manta_133.jpeg	Hom_Var	5+	90-100	concordant	concordant	v0.6_Call	DEL 1:83149851-83149909	DEL	50-100	Hom_Var
HG2_Ill_GATKHCSBGrefine_10629	16	68	Deletion	60881273	60881341	181	Hom_Var	4	4	1	100	2018-03-04	90-100	Hom_Var	8	8	1	100	Threshold2	Hom_Var	Hom_Var	8	8	1	100	concordant	HG2_Ill_GATKHCSBGrefine_10629.jpeg	Hom_Var	5+	90-100	concordant	concordant	v0.6_Call	DEL 16:60881273-60881341	DEL	50-100	Hom_Var
HG4_Ill_Krunchall_20478	14	74	Deletion	68995379	68995453	674	Hom_Var	8	8	1	100	5+	90-100	Hom_Var	16	16	1	100	Threshold2	Hom_Var	Hom_Var	14	14	1	100	concordant	HG4_Ill_Krunchall_20478.jpeg	Hom_Var	5+	90-100	concordant	concordant	v0.6_Call	DEL 14:68995379-68995453	DEL	50-100	Hom_Var
HG2_Ill_breakscan11_1171	7	84	Deletion	36352672	36352756	710	Hom_Var	8	8	1	100	5+	90-100	Hom_Var	11	11	1	100	Threshold2	Hom_Var	Hom_Var	11	11	1	100	concordant	HG2_Ill_breakscan11_1171.jpeg	Hom_Var	5+	90-100	concordant	concordant	v0.6_Call	DEL 7:36352672-36352756	DEL	50-100	Hom_Var
HG3_Ill_150bpfermikitraw_15194	11	61	Deletion	21789070	21789131	952	Hom_Var	9	9	1	100	5+	90-100	Hom_Var	15	15	1	100	Threshold2	Hom_Var	Hom_Var	15	15	1	100	concordant	HG3_Ill_150bpfermikitraw_15194.jpeg	Hom_Var	5+	90-100	concordant	concordant	v0.6_Call	DEL 11:21789070-21789131	DEL	50-100	Hom_Var
HG3_Ill_250bpfermikitraw_6991	4	63	Deletion	171969683	171969746	987	Hom_Var	9	9	1	100	5+	90-100	Hom_Var	13	13	1	100	Threshold2	Hom_Var	Hom_Var	12	12	1	100	concordant	HG3_Ill_250bpfermikitraw_6991.jpeg	Hom_Var	5+	90-100	concordant	concordant	v0.6_Call	DEL 4:171969683-171969746	DEL	50-100	Hom_Var
HG3_Ill_250bpfermikitraw_1588	1	82	Deletion	220226025	220226107	1133	Hom_Var	9	9	1	100	5+	90-100	Hom_Var	12	13	0.923077	92.3077	Threshold2	Hom_Var	Hom_Var	12	12	1	100	concordant	HG3_Ill_250bpfermikitraw_1588.jpeg	Hom_Var	5+	90-100	concordant	concordant	v0.6_Call	DEL 1:220226025-220226107	DEL	50-100	Hom_Var
HG4_10X_allpass_966	4	847	Deletion	152340705	152341552	84	Het_Var	8	8	1	100	5+	90-100	Het_Var	15	15	1	100	Threshold2	Het_Var	Het_Var	13	13	1	100	concordant	HG4_10X_allpass_966.jpeg	Het_Var	5+	90-100	concordant	concordant	v0.6_Call	DEL 4:152340705-152341552	DEL	400-1000	Het_Var
HG3_PB_pbsv_12861	12	478	Deletion	49470007	49470485	109	Het_Var	7	7	1	100	5+	90-100	Het_Var	12	12	1	100	Threshold2	Het_Var	Het_Var	11	11	1	100	concordant	HG3_PB_pbsv_12861.jpeg	Het_Var	5+	90-100	concordant	concordant	v0.6_Call	DEL 12:49470007-49470485	DEL	400-1000	Het_Var
HG2_PB_assemblyticsPBcR_7430	14	593	Deletion	22881665	22882258	195	Het_Var	7	7	1	100	5+	90-100	Het_Var	13	13	1	100	Threshold2	Het_Var	Het_Var	11	11	1	100	concordant	HG2_PB_assemblyticsPBcR_7430.jpeg	Het_Var	5+	90-100	concordant	concordant	v0.6_Call	DEL 14:22881665-22882258	DEL	400-1000	Het_Var
HG3_PB_assemblyticsfalcon_24347	7	417	Deletion	15885449	15885866	273	Het_Var	6	6	1	100	5+	90-100	Het_Var	13	13	1	100	Threshold2	Het_Var	Het_Var	11	11	1	100	concordant	HG3_PB_assemblyticsfalcon_24347.jpeg	Het_Var	5+	90-100	concordant	concordant	v0.6_Call	DEL 7:15885449-15885866	DEL	400-1000	Het_Var
HG3_Ill_MetaSV_1559	14	513	Deletion	39004514	39005027	319	Het_Var	7	7	1	100	5+	90-100	Het_Var	13	13	1	100	Threshold2	Het_Var	Het_Var	12	12	1	100	concordant	HG3_Ill_MetaSV_1559.jpeg	Het_Var	5+	90-100	concordant	concordant	v0.6_Call	DEL 14:39004514-39005027	DEL	400-1000	Het_Var
HG2_Ill_breakscan11_261	2	467	Deletion	78117890	78118357	389	Het_Var	7	7	1	100	5+	90-100	Het_Var	14	14	1	100	Threshold2	Het_Var	Het_Var	12	12	1	100	concordant	HG2_Ill_breakscan11_261.jpeg	Het_Var	5+	90-100	concordant	concordant	v0.6_Call	DEL 2:78117890-78118357	DEL	400-1000	Het_Var
HG3_10X_allpass_1185	5	452	Deletion	68724042	68724494	429	Het_Var	11	11	1	100	5+	90-100	Het_Var	16	16	1	100	Threshold2	Het_Var	Het_Var	15	15	1	100	concordant	HG3_10X_allpass_1185.jpeg	Het_Var	5+	90-100	concordant	concordant	v0.6_Call	DEL 5:68724042-68724494	DEL	400-1000	Het_Var
HG2_PB_SVrefine2PBcRplusDovetail_783	1	639	Deletion	220502943	220503582	441	Het_Var	7	7	1	100	5+	90-100	Het_Var	12	12	1	100	Threshold2	Het_Var	Het_Var	9	9	1	100	concordant	HG2_PB_SVrefine2PBcRplusDovetail_783.jpeg	Het_Var	5+	90-100	concordant	concordant	v0.6_Call	DEL 1:220502943-220503582	DEL	400-1000	Het_Var
HG3_PB_pbsv_5363	5	441	Deletion	1951004	1951445	602	Het_Var	4	4	1	100	2018-03-04	90-100	Het_Var	9	9	1	100	Threshold2	Het_Var	Het_Var	9	9	1	100	concordant	HG3_PB_pbsv_5363.jpeg	Het_Var	5+	90-100	concordant	concordant	v0.6_Call	DEL 5:1951004-1951445	DEL	400-1000	Het_Var
HG2_Ill_GATKHCSBGrefine_4203	5	921	Deletion	101693848	101694769	857	Het_Var	7	7	1	100	5+	90-100	Het_Var	13	13	1	100	Threshold2	Het_Var	Het_Var	13	13	1	100	concordant	HG2_Ill_GATKHCSBGrefine_4203.jpeg	Het_Var	5+	90-100	concordant	concordant	v0.6_Call	DEL 5:101693848-101694769	DEL	400-1000	Het_Var
HG3_Ill_manta_3543	16	418	Deletion	14453235	14453653	914	Het_Var	8	8	1	100	5+	90-100	Het_Var	15	16	0.9375	93.75	Threshold2	Het_Var	Het_Var	14	14	1	100	concordant	HG3_Ill_manta_3543.jpeg	Het_Var	5+	90-100	concordant	concordant	v0.6_Call	DEL 16:14453235-14453653	DEL	400-1000	Het_Var
HG2_10X_SVrefine210Xhap12_4073	5	483	Deletion	19078553	19079036	1007	Het_Var	7	7	1	100	5+	90-100	Het_Var	14	14	1	100	Threshold2	Het_Var	Het_Var	11	11	1	100	concordant	HG2_10X_SVrefine210Xhap12_4073.jpeg	Het_Var	5+	90-100	concordant	concordant	v0.6_Call	DEL 5:19078553-19079036	DEL	400-1000	Het_Var
HG4_Ill_GATKHCSBGrefine_4344	5	779	Deletion	121059231	121060010	1085	Het_Var	6	6	1	100	5+	90-100	Het_Var	14	14	1	100	Threshold2	Het_Var	Het_Var	12	12	1	100	concordant	HG4_Ill_GATKHCSBGrefine_4344.jpeg	Het_Var	5+	90-100	concordant	concordant	v0.6_Call	DEL 5:121059231-121060010	DEL	400-1000	Het_Var
HG4_Ill_SVrefine2DISCOVARDovetail_7210	8	811	Deletion	146057021	146057832	1264	Het_Var	6	6	1	100	5+	90-100	Het_Var	8	10	0.8	80	Threshold2	Het_Var	Het_Var	8	8	1	100	concordant	HG4_Ill_SVrefine2DISCOVARDovetail_7210.jpeg	Het_Var	5+	90-100	concordant	concordant	v0.6_Call	DEL 8:146057021-146057832	DEL	400-1000	Het_Var
HG3_Ill_Spiral_290	1	417	Deletion	40962347	40962764	715	Hom_Ref	8	8	1	100	5+	90-100	Hom_Ref	12	12	1	100	Threshold2	Hom_Ref	Hom_Ref	11	11	1	100	concordant	HG3_Ill_Spiral_290.jpeg	Hom_Ref	5+	90-100	concordant	concordant	v0.6_Call	DEL 1:40962347-40962764	DEL	400-1000	Hom_Ref
HG2_Ill_Krunchall_24544	20	717	Deletion	24903699	24904416	53	Hom_Var	8	8	1	100	5+	90-100	Hom_Var	16	16	1	100	Threshold2	Hom_Var	Hom_Var	12	12	1	100	concordant	HG2_Ill_Krunchall_24544.jpeg	Hom_Var	5+	90-100	concordant	concordant	v0.6_Call	DEL 20:24903699-24904416	DEL	400-1000	Hom_Var
HG3_Ill_SVrefine2DISCOVARDovetail_7797	9	683	Deletion	104219695	104220378	146	Hom_Var	8	8	1	100	5+	90-100	Hom_Var	13	13	1	100	Threshold2	Hom_Var	Hom_Var	12	12	1	100	concordant	HG3_Ill_SVrefine2DISCOVARDovetail_7797.jpeg	Hom_Var	5+	90-100	concordant	concordant	v0.6_Call	DEL 9:104219695-104220378	DEL	400-1000	Hom_Var
HG3_Ill_Krunchall_1320	1	555	Deletion	176478236	176478791	157	Hom_Var	9	9	1	100	5+	90-100	Hom_Var	16	17	0.941176	94.1176	Threshold2	Hom_Var	Hom_Var	14	14	1	100	concordant	HG3_Ill_Krunchall_1320.jpeg	Hom_Var	5+	90-100	concordant	concordant	v0.6_Call	DEL 1:176478236-176478791	DEL	400-1000	Hom_Var
HG2_Ill_MetaSV_3828	4	783	Deletion	187213954	187214737	233	Hom_Var	7	7	1	100	5+	90-100	Hom_Var	12	12	1	100	Threshold2	Hom_Var	Hom_Var	11	11	1	100	concordant	HG2_Ill_MetaSV_3828.jpeg	Hom_Var	5+	90-100	concordant	concordant	v0.6_Call	DEL 4:187213954-187214737	DEL	400-1000	Hom_Var
HG2_Ill_SpiralSDKrefine_2836	11	562	Deletion	69400840	69401402	339	Hom_Var	6	6	1	100	5+	90-100	Hom_Var	10	10	1	100	Threshold2	Hom_Var	Hom_Var	10	10	1	100	concordant	HG2_Ill_SpiralSDKrefine_2836.jpeg	Hom_Var	5+	90-100	concordant	concordant	v0.6_Call	DEL 11:69400840-69401402	DEL	400-1000	Hom_Var
HG2_Ill_MetaSV_3717	4	612	Deletion	134132413	134133025	468	Hom_Var	8	8	1	100	5+	90-100	Hom_Var	14	14	1	100	Threshold2	Hom_Var	Hom_Var	13	13	1	100	concordant	HG2_Ill_MetaSV_3717.jpeg	Hom_Var	5+	90-100	concordant	concordant	v0.6_Call	DEL 4:134132413-134133025	DEL	400-1000	Hom_Var
HG2_Ill_SVrefine2DISCOVARplusDovetail_8101	22	975	Deletion	35645164	35646139	490	Hom_Var	6	6	1	100	5+	90-100	Hom_Var	13	13	1	100	Threshold2	Hom_Var	Hom_Var	11	11	1	100	concordant	HG2_Ill_SVrefine2DISCOVARplusDovetail_8101.jpeg	Hom_Var	5+	90-100	concordant	concordant	v0.6_Call	DEL 22:35645164-35646139	DEL	400-1000	Hom_Var
HG2_Ill_manta_4416	16	842	Deletion	75429831	75430673	718	Hom_Var	7	7	1	100	5+	90-100	Hom_Var	15	15	1	100	Threshold2	Hom_Var	Hom_Var	12	12	1	100	concordant	HG2_Ill_manta_4416.jpeg	Hom_Var	5+	90-100	concordant	concordant	v0.6_Call	DEL 16:75429831-75430673	DEL	400-1000	Hom_Var
HG3_PB_assemblyticsfalcon_27884	9	732	Deletion	104443979	104444711	727	Hom_Var	7	7	1	100	5+	90-100	Hom_Var	8	8	1	100	Threshold2	Hom_Var	Hom_Var	8	8	1	100	concordant	HG3_PB_assemblyticsfalcon_27884.jpeg	Hom_Var	5+	90-100	concordant	concordant	v0.6_Call	DEL 9:104443979-104444711	DEL	400-1000	Hom_Var
HG2_PB_assemblyticsfalcon_1274	1	950	Deletion	159648707	159649657	1056	Hom_Var	8	8	1	100	5+	90-100	Hom_Var	15	15	1	100	Threshold2	Hom_Var	Hom_Var	13	13	1	100	concordant	HG2_PB_assemblyticsfalcon_1274.jpeg	Hom_Var	5+	90-100	concordant	concordant	v0.6_Call	DEL 1:159648707-159649657	DEL	400-1000	Hom_Var
HG2_Ill_SpiralSDKrefine_17404	8	896	Deletion	138742965	138743861	1123	Hom_Var	6	6	1	100	5+	90-100	Hom_Var	10	10	1	100	Threshold2	Hom_Var	Hom_Var	7	7	1	100	concordant	HG2_Ill_SpiralSDKrefine_17404.jpeg	Hom_Var	5+	90-100	concordant	concordant	v0.6_Call	DEL 8:138742965-138743861	DEL	400-1000	Hom_Var
HG3_PB_assemblyticsfalcon_8619	15	422	Deletion	29411474	29411896	1233	Hom_Var	8	8	1	100	5+	90-100	Hom_Var	13	13	1	100	Threshold2	Hom_Var	Hom_Var	10	10	1	100	concordant	HG3_PB_assemblyticsfalcon_8619.jpeg	Hom_Var	5+	90-100	concordant	concordant	v0.6_Call	DEL 15:29411474-29411896	DEL	400-1000	Hom_Var
HG4_Ill_SVrefine2DISCOVARDovetail_688	1	307	Deletion	169730413	169730720	65	Het_Var	9	9	1	100	5+	90-100	Het_Var	15	16	0.9375	93.75	Threshold2	Het_Var	Het_Var	14	14	1	100	concordant	HG4_Ill_SVrefine2DISCOVARDovetail_688.jpeg	Het_Var	5+	90-100	concordant	concordant	v0.6_Call	DEL 1:169730413-169730720	DEL	300-400	Het_Var
HG4_10X_allpass_2757	14	338	Deletion	78249852	78250190	161	Het_Var	9	9	1	100	5+	90-100	Het_Var	15	15	1	100	Threshold2	Het_Var	Het_Var	14	14	1	100	concordant	HG4_10X_allpass_2757.jpeg	Het_Var	5+	90-100	concordant	concordant	v0.6_Call	DEL 14:78249852-78250190	DEL	300-400	Het_Var
HG2_Ill_SVrefine2DISCOVARplusDovetail_477	1	324	Deletion	82963291	82963615	328	Het_Var	6	6	1	100	5+	90-100	Het_Var	11	12	0.916667	91.6667	Threshold2	Het_Var	Het_Var	10	10	1	100	concordant	HG2_Ill_SVrefine2DISCOVARplusDovetail_477.jpeg	Het_Var	5+	90-100	concordant	concordant	v0.6_Call	DEL 1:82963291-82963615	DEL	300-400	Het_Var
HG3_Ill_Krunchall_17422	12	330	Deletion	27434001	27434331	344	Het_Var	7	7	1	100	5+	90-100	Het_Var	11	11	1	100	Threshold2	Het_Var	Het_Var	11	11	1	100	concordant	HG3_Ill_Krunchall_17422.jpeg	Het_Var	5+	90-100	concordant	concordant	v0.6_Call	DEL 12:27434001-27434331	DEL	300-400	Het_Var
HG2_Ill_tnscope_1449	12	342	Deletion	29573406	29573748	358	Het_Var	9	9	1	100	5+	90-100	Het_Var	14	15	0.933333	93.3333	Threshold2	Het_Var	Het_Var	14	14	1	100	concordant	HG2_Ill_tnscope_1449.jpeg	Het_Var	5+	90-100	concordant	concordant	v0.6_Call	DEL 12:29573406-29573748	DEL	300-400	Het_Var
HG3_Ill_GATKHCSBGrefine_8073	11	316	Deletion	31152431	31152747	537	Het_Var	9	9	1	100	5+	90-100	Het_Var	13	14	0.928571	92.8571	Threshold2	Het_Var	Het_Var	12	12	1	100	concordant	HG3_Ill_GATKHCSBGrefine_8073.jpeg	Het_Var	5+	90-100	concordant	concordant	v0.6_Call	DEL 11:31152431-31152747	DEL	300-400	Het_Var
HG4_PB_pbsv_18665	20	314	Deletion	53292651	53292965	737	Het_Var	7	7	1	100	5+	90-100	Het_Var	16	16	1	100	Threshold2	Het_Var	Het_Var	13	13	1	100	concordant	HG4_PB_pbsv_18665.jpeg	Het_Var	5+	90-100	concordant	concordant	v0.6_Call	DEL 20:53292651-53292965	DEL	300-400	Het_Var
HG3_10X_allpass_63	1	317	Deletion	56887702	56888019	769	Het_Var	7	7	1	100	5+	90-100	Het_Var	13	13	1	100	Threshold2	Het_Var	Het_Var	11	11	1	100	concordant	HG3_10X_allpass_63.jpeg	Het_Var	5+	90-100	concordant	concordant	v0.6_Call	DEL 1:56887702-56888019	DEL	300-400	Het_Var
HG3_PB_pbsv_14751	14	336	Deletion	101990866	101991202	855	Het_Var	8	8	1	100	5+	90-100	Het_Var	13	13	1	100	Threshold2	Het_Var	Het_Var	13	13	1	100	concordant	HG3_PB_pbsv_14751.jpeg	Het_Var	5+	90-100	concordant	concordant	v0.6_Call	DEL 14:101990866-101991202	DEL	300-400	Het_Var
HG2_10X_SVrefine210Xhap12_9094	12	314	Deletion	13017634	13017948	859	Het_Var	8	8	1	100	5+	90-100	Het_Var	14	14	1	100	Threshold2	Het_Var	Het_Var	13	13	1	100	concordant	HG2_10X_SVrefine210Xhap12_9094.jpeg	Het_Var	5+	90-100	concordant	concordant	v0.6_Call	DEL 12:13017634-13017948	DEL	300-400	Het_Var
HG2_10X_SVrefine210Xhap12_5790	7	318	Deletion	49552065	49552383	872	Het_Var	5	5	1	100	5+	90-100	Het_Var	14	14	1	100	Threshold2	Het_Var	Het_Var	11	11	1	100	concordant	HG2_10X_SVrefine210Xhap12_5790.jpeg	Het_Var	5+	90-100	concordant	concordant	v0.6_Call	DEL 7:49552065-49552383	DEL	300-400	Het_Var
HG3_Ill_scalpel_5939	5	328	Deletion	88043138	88043466	893	Het_Var	8	8	1	100	5+	90-100	Het_Var	13	14	0.928571	92.8571	Threshold2	Het_Var	Het_Var	12	12	1	100	concordant	HG3_Ill_scalpel_5939.jpeg	Het_Var	5+	90-100	concordant	concordant	v0.6_Call	DEL 5:88043138-88043466	DEL	300-400	Het_Var
HG2_Ill_breakscan11_1859	12	313	Deletion	13017634	13017947	935	Het_Var	8	8	1	100	5+	90-100	Het_Var	13	14	0.928571	92.8571	Threshold2	Het_Var	Het_Var	12	12	1	100	concordant	HG2_Ill_breakscan11_1859.jpeg	Het_Var	5+	90-100	concordant	concordant	v0.6_Call	DEL 12:13017634-13017947	DEL	300-400	Het_Var
HG2_PB_SVrefine2Falcon1plusDovetail_8765	4	378	Deletion	65719086	65719464	1004	Het_Var	10	10	1	100	5+	90-100	Het_Var	15	16	0.9375	93.75	Threshold2	Het_Var	Het_Var	15	15	1	100	concordant	HG2_PB_SVrefine2Falcon1plusDovetail_8765.jpeg	Het_Var	5+	90-100	concordant	concordant	v0.6_Call	DEL 4:65719086-65719464	DEL	300-400	Het_Var
HG3_Ill_MetaSV_4840	7	342	Deletion	42604622	42604964	1064	Het_Var	8	8	1	100	5+	90-100	Het_Var	12	12	1	100	Threshold2	Het_Var	Het_Var	11	11	1	100	concordant	HG3_Ill_MetaSV_4840.jpeg	Het_Var	5+	90-100	concordant	concordant	v0.6_Call	DEL 7:42604622-42604964	DEL	300-400	Het_Var
HG2_Ill_scalpel_8292	7	311	Deletion	116842003	116842314	1069	Het_Var	7	7	1	100	5+	90-100	Het_Var	15	15	1	100	Threshold2	Het_Var	Het_Var	12	12	1	100	concordant	HG2_Ill_scalpel_8292.jpeg	Het_Var	5+	90-100	concordant	concordant	v0.6_Call	DEL 7:116842003-116842314	DEL	300-400	Het_Var
HG2_PB_pbsv_7921	7	318	Deletion	14227980	14228298	1072	Het_Var	9	9	1	100	5+	90-100	Het_Var	13	13	1	100	Threshold2	Het_Var	Het_Var	11	11	1	100	concordant	HG2_PB_pbsv_7921.jpeg	Het_Var	5+	90-100	concordant	concordant	v0.6_Call	DEL 7:14227980-14228298	DEL	300-400	Het_Var
HG3_Ill_Spiral_10777	9	319	Deletion	30345787	30346106	1187	Het_Var	6	6	1	100	5+	90-100	Het_Var	12	12	1	100	Threshold2	Het_Var	Het_Var	11	11	1	100	concordant	HG3_Ill_Spiral_10777.jpeg	Het_Var	5+	90-100	concordant	concordant	v0.6_Call	DEL 9:30345787-30346106	DEL	300-400	Het_Var
HG4_Ill_Krunchall_606	1	309	Deletion	71741331	71741640	76	Hom_Var	8	8	1	100	5+	90-100	Hom_Var	13	13	1	100	Threshold2	Hom_Var	Hom_Var	12	12	1	100	concordant	HG4_Ill_Krunchall_606.jpeg	Hom_Var	5+	90-100	concordant	concordant	v0.6_Call	DEL 1:71741331-71741640	DEL	300-400	Hom_Var
HG2_10X_allpass_2423	15	325	Deletion	64633178	64633503	88	Hom_Var	9	9	1	100	5+	90-100	Hom_Var	14	14	1	100	Threshold2	Hom_Var	Hom_Var	14	14	1	100	concordant	HG2_10X_allpass_2423.jpeg	Hom_Var	5+	90-100	concordant	concordant	v0.6_Call	DEL 15:64633178-64633503	DEL	300-400	Hom_Var
HG4_PB_HySA_9485	5	334	Deletion	172889722	172890056	120	Hom_Var	8	8	1	100	5+	90-100	Hom_Var	15	16	0.9375	93.75	Threshold2	Hom_Var	Hom_Var	14	14	1	100	concordant	HG4_PB_HySA_9485.jpeg	Hom_Var	5+	90-100	concordant	concordant	v0.6_Call	DEL 5:172889722-172890056	DEL	300-400	Hom_Var
HG3_PB_pbsv_4570	4	322	Deletion	86660755	86661077	223	Hom_Var	7	7	1	100	5+	90-100	Hom_Var	15	15	1	100	Threshold2	Hom_Var	Hom_Var	13	13	1	100	concordant	HG3_PB_pbsv_4570.jpeg	Hom_Var	5+	90-100	concordant	concordant	v0.6_Call	DEL 4:86660755-86661077	DEL	300-400	Hom_Var
HG4_PB_assemblyticsfalcon_18947	4	341	Deletion	43931495	43931836	224	Hom_Var	5	5	1	100	5+	90-100	Hom_Var	11	11	1	100	Threshold2	Hom_Var	Hom_Var	8	8	1	100	concordant	HG4_PB_assemblyticsfalcon_18947.jpeg	Hom_Var	5+	90-100	concordant	concordant	v0.6_Call	DEL 4:43931495-43931836	DEL	300-400	Hom_Var
HG3_PB_HySA_16120	9	325	Deletion	136414102	136414427	422	Hom_Var	9	9	1	100	5+	90-100	Hom_Var	15	15	1	100	Threshold2	Hom_Var	Hom_Var	14	14	1	100	concordant	HG3_PB_HySA_16120.jpeg	Hom_Var	5+	90-100	concordant	concordant	v0.6_Call	DEL 9:136414102-136414427	DEL	300-400	Hom_Var
HG4_Ill_SVrefine2DISCOVARDovetail_7478	9	313	Deletion	83630432	83630745	423	Hom_Var	8	8	1	100	5+	90-100	Hom_Var	14	14	1	100	Threshold2	Hom_Var	Hom_Var	12	12	1	100	concordant	HG4_Ill_SVrefine2DISCOVARDovetail_7478.jpeg	Hom_Var	5+	90-100	concordant	concordant	v0.6_Call	DEL 9:83630432-83630745	DEL	300-400	Hom_Var
HG2_PB_assemblyticsfalcon_21673	5	326	Deletion	95343326	95343652	451	Hom_Var	8	8	1	100	5+	90-100	Hom_Var	13	13	1	100	Threshold2	Hom_Var	Hom_Var	11	11	1	100	concordant	HG2_PB_assemblyticsfalcon_21673.jpeg	Hom_Var	5+	90-100	concordant	concordant	v0.6_Call	DEL 5:95343326-95343652	DEL	300-400	Hom_Var
HG2_PB_SVrefine2PBcRplusDovetail_3584	15	331	Deletion	59712886	59713217	503	Hom_Var	7	7	1	100	5+	90-100	Hom_Var	13	14	0.928571	92.8571	Threshold2	Hom_Var	Hom_Var	12	12	1	100	concordant	HG2_PB_SVrefine2PBcRplusDovetail_3584.jpeg	Hom_Var	5+	90-100	concordant	concordant	v0.6_Call	DEL 15:59712886-59713217	DEL	300-400	Hom_Var
HG3_10X_allpass_2054	9	311	Deletion	30491283	30491594	521	Hom_Var	8	8	1	100	5+	90-100	Hom_Var	13	13	1	100	Threshold2	Hom_Var	Hom_Var	11	11	1	100	concordant	HG3_10X_allpass_2054.jpeg	Hom_Var	5+	90-100	concordant	concordant	v0.6_Call	DEL 9:30491283-30491594	DEL	300-400	Hom_Var
HG4_PB_SVrefine2Falcon1Dovetail_12212	22	328	Deletion	43549346	43549674	532	Hom_Var	10	10	1	100	5+	90-100	Hom_Var	15	15	1	100	Threshold2	Hom_Var	Hom_Var	13	13	1	100	concordant	HG4_PB_SVrefine2Falcon1Dovetail_12212.jpeg	Hom_Var	5+	90-100	concordant	concordant	v0.6_Call	DEL 22:43549346-43549674	DEL	300-400	Hom_Var
HG3_Ill_manta_430	2	337	Deletion	85519105	85519442	574	Hom_Var	9	9	1	100	5+	90-100	Hom_Var	13	13	1	100	Threshold2	Hom_Var	Hom_Var	13	13	1	100	concordant	HG3_Ill_manta_430.jpeg	Hom_Var	5+	90-100	concordant	concordant	v0.6_Call	DEL 2:85519105-85519442	DEL	300-400	Hom_Var
HG4_Ill_MetaSV_1023	12	308	Deletion	18317392	18317700	682	Hom_Var	7	7	1	100	5+	90-100	Hom_Var	10	11	0.909091	90.9091	Threshold2	Hom_Var	Hom_Var	10	10	1	100	concordant	HG4_Ill_MetaSV_1023.jpeg	Hom_Var	5+	90-100	concordant	concordant	v0.6_Call	DEL 12:18317392-18317700	DEL	300-400	Hom_Var
HG2_Ill_breakscan11_2802	22	322	Deletion	42140478	42140800	746	Hom_Var	8	8	1	100	5+	90-100	Hom_Var	14	14	1	100	Threshold2	Hom_Var	Hom_Var	13	13	1	100	concordant	HG2_Ill_breakscan11_2802.jpeg	Hom_Var	5+	90-100	concordant	concordant	v0.6_Call	DEL 22:42140478-42140800	DEL	300-400	Hom_Var
HG2_PB_HySA_9913	4	321	Deletion	187795698	187796019	812	Hom_Var	7	7	1	100	5+	90-100	Hom_Var	11	11	1	100	Threshold2	Hom_Var	Hom_Var	10	10	1	100	concordant	HG2_PB_HySA_9913.jpeg	Hom_Var	5+	90-100	concordant	concordant	v0.6_Call	DEL 4:187795698-187796019	DEL	300-400	Hom_Var
HG4_Ill_scalpel_1078	1	334	Deletion	214770103	214770437	814	Hom_Var	7	7	1	100	5+	90-100	Hom_Var	9	9	1	100	Threshold2	Hom_Var	Hom_Var	9	9	1	100	concordant	HG4_Ill_scalpel_1078.jpeg	Hom_Var	5+	90-100	concordant	concordant	v0.6_Call	DEL 1:214770103-214770437	DEL	300-400	Hom_Var
HG3_Ill_SVrefine2DISCOVARDovetail_13135	20	312	Deletion	35815609	35815921	852	Hom_Var	8	8	1	100	5+	90-100	Hom_Var	16	16	1	100	Threshold2	Hom_Var	Hom_Var	14	14	1	100	concordant	HG3_Ill_SVrefine2DISCOVARDovetail_13135.jpeg	Hom_Var	5+	90-100	concordant	concordant	v0.6_Call	DEL 20:35815609-35815921	DEL	300-400	Hom_Var
HG2_Ill_SpiralSDKrefine_9851	20	399	Deletion	42676125	42676524	863	Hom_Var	9	9	1	100	5+	90-100	Hom_Var	18	18	1	100	Threshold2	Hom_Var	Hom_Var	16	16	1	100	concordant	HG2_Ill_SpiralSDKrefine_9851.jpeg	Hom_Var	5+	90-100	concordant	concordant	v0.6_Call	DEL 20:42676125-42676524	DEL	300-400	Hom_Var
HG2_10X_SVrefine210Xhap12_4460	5	321	Deletion	115894136	115894457	900	Hom_Var	8	8	1	100	5+	90-100	Hom_Var	16	16	1	100	Threshold2	Hom_Var	Hom_Var	13	13	1	100	concordant	HG2_10X_SVrefine210Xhap12_4460.jpeg	Hom_Var	5+	90-100	concordant	concordant	v0.6_Call	DEL 5:115894136-115894457	DEL	300-400	Hom_Var
HG2_PB_SVrefine2PBcRplusDovetail_8235	4	316	Deletion	95498964	95499280	908	Hom_Var	8	8	1	100	5+	90-100	Hom_Var	13	13	1	100	Threshold2	Hom_Var	Hom_Var	11	11	1	100	concordant	HG2_PB_SVrefine2PBcRplusDovetail_8235.jpeg	Hom_Var	5+	90-100	concordant	concordant	v0.6_Call	DEL 4:95498964-95499280	DEL	300-400	Hom_Var
HG2_Ill_breakscan11_2041	13	313	Deletion	105161209	105161522	993	Hom_Var	5	5	1	100	5+	90-100	Hom_Var	10	10	1	100	Threshold2	Hom_Var	Hom_Var	9	9	1	100	concordant	HG2_Ill_breakscan11_2041.jpeg	Hom_Var	5+	90-100	concordant	concordant	v0.6_Call	DEL 13:105161209-105161522	DEL	300-400	Hom_Var
HG2_10X_allpass_197	1	336	Deletion	228814805	228815141	1077	Hom_Var	7	7	1	100	5+	90-100	Hom_Var	13	13	1	100	Threshold2	Hom_Var	Hom_Var	10	10	1	100	concordant	HG2_10X_allpass_197.jpeg	Hom_Var	5+	90-100	concordant	concordant	v0.6_Call	DEL 1:228814805-228815141	DEL	300-400	Hom_Var
HG2_10X_SVrefine210Xhap12_10006	13	309	Deletion	106034706	106035015	1125	Hom_Var	8	8	1	100	5+	90-100	Hom_Var	13	13	1	100	Threshold2	Hom_Var	Hom_Var	12	12	1	100	concordant	HG2_10X_SVrefine210Xhap12_10006.jpeg	Hom_Var	5+	90-100	concordant	concordant	v0.6_Call	DEL 13:106034706-106035015	DEL	300-400	Hom_Var
HG3_10X_allpass_2547	12	337	Deletion	21775398	21775735	1143	Hom_Var	6	6	1	100	5+	90-100	Hom_Var	10	10	1	100	Threshold2	Hom_Var	Hom_Var	9	9	1	100	concordant	HG3_10X_allpass_2547.jpeg	Hom_Var	5+	90-100	concordant	concordant	v0.6_Call	DEL 12:21775398-21775735	DEL	300-400	Hom_Var
HG3_Ill_GATKHCSBGrefine_7108	9	345	Deletion	118109642	118109987	1165	Hom_Var	8	8	1	100	5+	90-100	Hom_Var	13	13	1	100	Threshold2	Hom_Var	Hom_Var	12	12	1	100	concordant	HG3_Ill_GATKHCSBGrefine_7108.jpeg	Hom_Var	5+	90-100	concordant	concordant	v0.6_Call	DEL 9:118109642-118109987	DEL	300-400	Hom_Var
HG2_Ill_tnscope_91	1	323	Deletion	158712031	158712354	1196	Hom_Var	7	7	1	100	5+	90-100	Hom_Var	15	15	1	100	Threshold2	Hom_Var	Hom_Var	12	12	1	100	concordant	HG2_Ill_tnscope_91.jpeg	Hom_Var	5+	90-100	concordant	concordant	v0.6_Call	DEL 1:158712031-158712354	DEL	300-400	Hom_Var
HG3_Ill_GATKHC_15837	8	20	Deletion	129437045	129437065	107	Het_Var	6	6	1	100	5+	90-100	Het_Var	10	11	0.909091	90.9091	Threshold2	Het_Var	Het_Var	9	9	1	100	concordant	HG3_Ill_GATKHC_15837.jpeg	Het_Var	5+	90-100	concordant	concordant	v0.6_Call	DEL 8:129437045-129437065	DEL	20-50	Het_Var
HG3_PB_assemblyticsfalcon_547	1	23	Deletion	46771140	46771163	123	Het_Var	6	6	1	100	5+	90-100	Het_Var	10	12	0.833333	83.3333	Threshold2	Het_Var	Het_Var	10	10	1	100	concordant	HG3_PB_assemblyticsfalcon_547.jpeg	Het_Var	5+	90-100	concordant	concordant	v0.6_Call	DEL 1:46771140-46771163	DEL	20-50	Het_Var
HG3_Ill_250bpfermikitraw_18407	13	50	Deletion	74531152	74531202	191	Het_Var	6	6	1	100	5+	90-100	Het_Var	9	10	0.9	90	Threshold2	Het_Var	Het_Var	9	9	1	100	concordant	HG3_Ill_250bpfermikitraw_18407.jpeg	Het_Var	5+	90-100	concordant	concordant	v0.6_Call	DEL 13:74531152-74531202	DEL	20-50	Het_Var
HG2_Ill_Krunchall_277	1	21	Deletion	26644035	26644056	260	Het_Var	8	8	1	100	5+	90-100	Het_Var	14	14	1	100	Threshold2	Het_Var	Het_Var	13	13	1	100	concordant	HG2_Ill_Krunchall_277.jpeg	Het_Var	5+	90-100	concordant	concordant	v0.6_Call	DEL 1:26644035-26644056	DEL	20-50	Het_Var
HG3_Ill_Spiral_10643	9	47	Deletion	12756779	12756826	418	Het_Var	8	8	1	100	5+	90-100	Het_Var	11	11	1	100	Threshold2	Het_Var	Het_Var	10	10	1	100	concordant	HG3_Ill_Spiral_10643.jpeg	Het_Var	5+	90-100	concordant	concordant	v0.6_Call	DEL 9:12756779-12756826	DEL	20-50	Het_Var
HG3_Ill_Krunchall_1398	1	24	Deletion	190016382	190016406	480	Het_Var	8	8	1	100	5+	90-100	Het_Var	11	11	1	100	Threshold2	Het_Var	Het_Var	11	11	1	100	concordant	HG3_Ill_Krunchall_1398.jpeg	Het_Var	5+	90-100	concordant	concordant	v0.6_Call	DEL 1:190016382-190016406	DEL	20-50	Het_Var
HG2_Ill_150bpfermikitraw_318	1	20	Deletion	38760816	38760836	507	Het_Var	6	6	1	100	5+	90-100	Het_Var	10	11	0.909091	90.9091	Threshold2	Het_Var	Het_Var	9	9	1	100	concordant	HG2_Ill_150bpfermikitraw_318.jpeg	Het_Var	5+	90-100	concordant	concordant	v0.6_Call	DEL 1:38760816-38760836	DEL	20-50	Het_Var
HG3_Ill_150bpfermikitraw_13622	9	21	Deletion	138091217	138091238	683	Het_Var	9	9	1	100	5+	90-100	Het_Var	14	14	1	100	Threshold2	Het_Var	Het_Var	14	14	1	100	concordant	HG3_Ill_150bpfermikitraw_13622.jpeg	Het_Var	5+	90-100	concordant	concordant	v0.6_Call	DEL 9:138091217-138091238	DEL	20-50	Het_Var
HG4_CG_vcfBeta_11849	21	21	Deletion	46233494	46233515	720	Het_Var	7	7	1	100	5+	90-100	Het_Var	12	12	1	100	Threshold2	Het_Var	Het_Var	12	12	1	100	concordant	HG4_CG_vcfBeta_11849.jpeg	Het_Var	5+	90-100	concordant	concordant	v0.6_Call	DEL 21:46233494-46233515	DEL	20-50	Het_Var
HG4_CG_vcfBeta_9145	13	25	Deletion	110587583	110587608	767	Het_Var	5	5	1	100	5+	90-100	Het_Var	10	10	1	100	Threshold2	Het_Var	Het_Var	9	9	1	100	concordant	HG4_CG_vcfBeta_9145.jpeg	Het_Var	5+	90-100	concordant	concordant	v0.6_Call	DEL 13:110587583-110587608	DEL	20-50	Het_Var
HG4_Ill_svaba_2488	2	36	Deletion	81604891	81604927	790	Het_Var	6	6	1	100	5+	90-100	Het_Var	12	13	0.923077	92.3077	Threshold2	Het_Var	Het_Var	11	11	1	100	concordant	HG4_Ill_svaba_2488.jpeg	Het_Var	5+	90-100	concordant	concordant	v0.6_Call	DEL 2:81604891-81604927	DEL	20-50	Het_Var
HG2_PB_assemblyticsfalcon_4138	11	25	Deletion	31000348	31000373	801	Het_Var	8	8	1	100	5+	90-100	Het_Var	10	12	0.833333	83.3333	Threshold2	Het_Var	Het_Var	10	10	1	100	concordant	HG2_PB_assemblyticsfalcon_4138.jpeg	Het_Var	5+	90-100	concordant	concordant	v0.6_Call	DEL 11:31000348-31000373	DEL	20-50	Het_Var
HG4_Ill_Krunchall_11933	7	22	Deletion	67152377	67152399	821	Het_Var	6	6	1	100	5+	90-100	Het_Var	10	10	1	100	Threshold2	Het_Var	Het_Var	9	9	1	100	concordant	HG4_Ill_Krunchall_11933.jpeg	Het_Var	5+	90-100	concordant	concordant	v0.6_Call	DEL 7:67152377-67152399	DEL	20-50	Het_Var
HG4_Ill_scalpel_4415	4	24	Deletion	73255628	73255652	841	Het_Var	9	9	1	100	5+	90-100	Het_Var	13	14	0.928571	92.8571	Threshold2	Het_Var	Het_Var	13	13	1	100	concordant	HG4_Ill_scalpel_4415.jpeg	Het_Var	5+	90-100	concordant	concordant	v0.6_Call	DEL 4:73255628-73255652	DEL	20-50	Het_Var
HG2_Ill_scalpel_14227	14	29	Deletion	98867384	98867413	858	Het_Var	7	7	1	100	5+	90-100	Het_Var	12	12	1	100	Threshold2	Het_Var	Het_Var	11	11	1	100	concordant	HG2_Ill_scalpel_14227.jpeg	Het_Var	5+	90-100	concordant	concordant	v0.6_Call	DEL 14:98867384-98867413	DEL	20-50	Het_Var
HG4_PB_HySA_17593	11	29	Deletion	23517320	23517349	1047	Het_Var	7	7	1	100	5+	90-100	Het_Var	10	10	1	100	Threshold2	Het_Var	Het_Var	10	10	1	100	concordant	HG4_PB_HySA_17593.jpeg	Het_Var	5+	90-100	concordant	concordant	v0.6_Call	DEL 11:23517320-23517349	DEL	20-50	Het_Var
HG2_Ill_Cortex_2635	14	22	Deletion	67294322	67294344	1174	Het_Var	8	8	1	100	5+	90-100	Het_Var	15	15	1	100	Threshold2	Het_Var	Het_Var	13	13	1	100	concordant	HG2_Ill_Cortex_2635.jpeg	Het_Var	5+	90-100	concordant	concordant	v0.6_Call	DEL 14:67294322-67294344	DEL	20-50	Het_Var
HG4_Ill_svaba_5734	4	24	Deletion	38626954	38626978	398	Hom_Ref	9	9	1	100	5+	90-100	Hom_Ref	15	17	0.882353	88.2353	Threshold2	Hom_Ref	Hom_Ref	14	14	1	100	concordant	HG4_Ill_svaba_5734.jpeg	Hom_Ref	5+	90-100	concordant	concordant	v0.6_Call	DEL 4:38626954-38626978	DEL	20-50	Hom_Ref
HG4_Ill_GATKHC_23515	14	22	Deletion	51973801	51973823	1210	Hom_Ref	7	7	1	100	5+	90-100	Hom_Ref	10	11	0.909091	90.9091	Threshold2	Hom_Ref	Hom_Ref	10	10	1	100	concordant	HG4_Ill_GATKHC_23515.jpeg	Hom_Ref	5+	90-100	concordant	concordant	v0.6_Call	DEL 14:51973801-51973823	DEL	20-50	Hom_Ref
HG2_CG_vcfBeta_7493	12	22	Deletion	58485887	58485909	675	Hom_Var	8	8	1	100	5+	90-100	Hom_Var	15	15	1	100	Threshold2	Hom_Var	Hom_Var	13	13	1	100	concordant	HG2_CG_vcfBeta_7493.jpeg	Hom_Var	5+	90-100	concordant	concordant	v0.6_Call	DEL 12:58485887-58485909	DEL	20-50	Hom_Var
HG3_Ill_Krunchall_24916	21	1321	Deletion	47657351	47658672	14	Het_Var	19	19	1	100	5+	90-100	Het_Var	33	35	0.942857	94.2857	Threshold2	Het_Var	Het_Var	26	26	1	100	concordant	HG3_Ill_Krunchall_24916.jpeg	Het_Var	5+	90-100	concordant	concordant	v0.6_Call	DEL 21:47657351-47658672	DEL	1000-5999	Het_Var
HG2_PB_pbsv_13245	12	1163	Deletion	60412335	60413498	44	Het_Var	8	8	1	100	5+	90-100	Het_Var	13	13	1	100	Threshold2	Het_Var	Het_Var	13	13	1	100	concordant	HG2_PB_pbsv_13245.jpeg	Het_Var	5+	90-100	concordant	concordant	v0.6_Call	DEL 12:60412335-60413498	DEL	1000-5999	Het_Var
HG2_Ill_Krunchall_6612	4	2090	Deletion	82929313	82931403	52	Het_Var	9	9	1	100	5+	90-100	Het_Var	14	14	1	100	Threshold2	Het_Var	Het_Var	12	12	1	100	concordant	HG2_Ill_Krunchall_6612.jpeg	Het_Var	5+	90-100	concordant	concordant	v0.6_Call	DEL 4:82929313-82931403	DEL	1000-5999	Het_Var
HG2_PB_PB10Xdip_22178	4	3660	Deletion	35240774	35244434	62	Het_Var	3	3	1	100	2018-03-04	90-100	Het_Var	4	5	0.8	80	Threshold2	Het_Var	Het_Var	4	4	1	100	concordant	HG2_PB_PB10Xdip_22178.jpeg	Het_Var	2018-03-04	90-100	concordant	concordant	v0.6_Call	DEL 4:35240774-35244434	DEL	1000-5999	Het_Var
HG2_Ill_SVrefine2DISCOVARplusDovetail_9682	4	1162	Deletion	109720945	109722107	182	Het_Var	8	8	1	100	5+	90-100	Het_Var	10	11	0.909091	90.9091	Threshold2	Het_Var	Het_Var	10	10	1	100	concordant	HG2_Ill_SVrefine2DISCOVARplusDovetail_9682.jpeg	Het_Var	5+	90-100	concordant	concordant	v0.6_Call	DEL 4:109720945-109722107	DEL	1000-5999	Het_Var
HG4_PB_pbsv_4851	4	5981	Deletion	115507883	115513864	192	Het_Var	6	6	1	100	5+	90-100	Het_Var	13	14	0.928571	92.8571	Threshold2	Het_Var	Het_Var	12	12	1	100	concordant	HG4_PB_pbsv_4851.jpeg	Het_Var	5+	90-100	concordant	concordant	v0.6_Call	DEL 4:115507883-115513864	DEL	1000-5999	Het_Var
HG2_PB_SVrefine2PBcRplusDovetail_10143	7	2299	Deletion	16171773	16174072	278	Het_Var	7	7	1	100	5+	90-100	Het_Var	12	12	1	100	Threshold2	Het_Var	Het_Var	11	11	1	100	concordant	HG2_PB_SVrefine2PBcRplusDovetail_10143.jpeg	Het_Var	5+	90-100	concordant	concordant	v0.6_Call	DEL 7:16171773-16174072	DEL	1000-5999	Het_Var
HG2_PB_pbsv_5845	5	1642	Deletion	61574776	61576418	341	Het_Var	10	10	1	100	5+	90-100	Het_Var	17	18	0.944444	94.4444	Threshold2	Het_Var	Het_Var	16	16	1	100	concordant	HG2_PB_pbsv_5845.jpeg	Het_Var	5+	90-100	concordant	concordant	v0.6_Call	DEL 5:61574776-61576418	DEL	1000-5999	Het_Var
HG2_PB_pbsv_6117	5	4693	Deletion	121576115	121580808	592	Het_Var	9	9	1	100	5+	90-100	Het_Var	15	15	1	100	Threshold2	Het_Var	Het_Var	12	12	1	100	concordant	HG2_PB_pbsv_6117.jpeg	Het_Var	5+	90-100	concordant	concordant	v0.6_Call	DEL 5:121576115-121580808	DEL	1000-5999	Het_Var
HG2_PB_SVrefine2PB10Xhap12_7334	9	1226	Deletion	4376409	4377635	650	Het_Var	7	7	1	100	5+	90-100	Het_Var	12	12	1	100	Threshold2	Het_Var	Het_Var	11	11	1	100	concordant	HG2_PB_SVrefine2PB10Xhap12_7334.jpeg	Het_Var	5+	90-100	concordant	concordant	v0.6_Call	DEL 9:4376409-4377635	DEL	1000-5999	Het_Var
HG4_Ill_SVrefine2DISCOVARDovetail_626	1	1519	Deletion	157173865	157175384	678	Het_Var	11	11	1	100	5+	90-100	Het_Var	15	16	0.9375	93.75	Threshold2	Het_Var	Het_Var	15	15	1	100	concordant	HG4_Ill_SVrefine2DISCOVARDovetail_626.jpeg	Het_Var	5+	90-100	concordant	concordant	v0.6_Call	DEL 1:157173865-157175384	DEL	1000-5999	Het_Var
HG3_10X_allpass_2992	15	5079	Deletion	71708609	71713688	884	Het_Var	8	8	1	100	5+	90-100	Het_Var	12	13	0.923077	92.3077	Threshold2	Het_Var	Het_Var	11	11	1	100	concordant	HG3_10X_allpass_2992.jpeg	Het_Var	5+	90-100	concordant	concordant	v0.6_Call	DEL 15:71708609-71713688	DEL	1000-5999	Het_Var
HG2_PB_pbsv_12654	11	3331	Deletion	106786239	106789570	1013	Het_Var	7	7	1	100	5+	90-100	Het_Var	13	13	1	100	Threshold2	Het_Var	Het_Var	11	11	1	100	concordant	HG2_PB_pbsv_12654.jpeg	Het_Var	5+	90-100	concordant	concordant	v0.6_Call	DEL 11:106786239-106789570	DEL	1000-5999	Het_Var
HG2_PB_PB10Xdip_6416	11	1177	Deletion	99185459	99186636	1189	Het_Var	6	6	1	100	5+	90-100	Het_Var	11	13	0.846154	84.6154	Threshold2	Het_Var	Het_Var	10	10	1	100	concordant	HG2_PB_PB10Xdip_6416.jpeg	Het_Var	5+	90-100	concordant	concordant	v0.6_Call	DEL 11:99185459-99186636	DEL	1000-5999	Het_Var
HG2_Ill_breakscan11_2207	15	1004	Deletion	41861217	41862221	1191	Hom_Ref	7	7	1	100	5+	90-100	Hom_Ref	12	13	0.923077	92.3077	Threshold2	Hom_Ref	Hom_Ref	11	11	1	100	concordant	HG2_Ill_breakscan11_2207.jpeg	Hom_Ref	5+	90-100	concordant	concordant	v0.6_Call	DEL 15:41861217-41862221	DEL	1000-5999	Hom_Ref
HG2_Ill_MetaSV_3979	5	1140	Deletion	55429206	55430346	95	Hom_Var	11	11	1	100	5+	90-100	Hom_Var	17	18	0.944444	94.4444	Threshold2	Hom_Var	Hom_Var	15	15	1	100	concordant	HG2_Ill_MetaSV_3979.jpeg	Hom_Var	5+	90-100	concordant	concordant	v0.6_Call	DEL 5:55429206-55430346	DEL	1000-5999	Hom_Var
HG4_PB_pbsv_13016	12	1111	Deletion	17444826	17445937	234	Hom_Var	7	7	1	100	5+	90-100	Hom_Var	13	13	1	100	Threshold2	Hom_Var	Hom_Var	11	11	1	100	concordant	HG4_PB_pbsv_13016.jpeg	Hom_Var	5+	90-100	concordant	concordant	v0.6_Call	DEL 12:17444826-17445937	DEL	1000-5999	Hom_Var
HG2_PB_SVrefine2PB10Xhap12_4192	5	1137	Deletion	55428997	55430134	277	Hom_Var	5	5	1	100	5+	90-100	Hom_Var	11	11	1	100	Threshold2	Hom_Var	Hom_Var	10	10	1	100	concordant	HG2_PB_SVrefine2PB10Xhap12_4192.jpeg	Hom_Var	5+	90-100	concordant	concordant	v0.6_Call	DEL 5:55428997-55430134	DEL	1000-5999	Hom_Var
HG3_PB_SVrefine2Falcon1Dovetail_453	1	2578	Deletion	112835082	112837660	327	Hom_Var	5	5	1	100	5+	90-100	Hom_Var	12	12	1	100	Threshold2	Hom_Var	Hom_Var	11	11	1	100	concordant	HG3_PB_SVrefine2Falcon1Dovetail_453.jpeg	Hom_Var	5+	90-100	concordant	concordant	v0.6_Call	DEL 1:112835082-112837660	DEL	1000-5999	Hom_Var
HG2_PB_assemblyticsfalcon_16667	22	1708	Deletion	27168076	27169784	401	Hom_Var	8	8	1	100	5+	90-100	Hom_Var	13	13	1	100	Threshold2	Hom_Var	Hom_Var	11	11	1	100	concordant	HG2_PB_assemblyticsfalcon_16667.jpeg	Hom_Var	5+	90-100	concordant	concordant	v0.6_Call	DEL 22:27168076-27169784	DEL	1000-5999	Hom_Var
HG3_PB_SVrefine2Falcon1Dovetail_3625	5	1961	Deletion	60001704	60003665	901	Hom_Var	9	9	1	100	5+	90-100	Hom_Var	14	14	1	100	Threshold2	Hom_Var	Hom_Var	13	13	1	100	concordant	HG3_PB_SVrefine2Falcon1Dovetail_3625.jpeg	Hom_Var	5+	90-100	concordant	concordant	v0.6_Call	DEL 5:60001704-60003665	DEL	1000-5999	Hom_Var
HG2_PB_assemblyticsPBcR_27460	9	1326	Deletion	132026714	132028040	913	Hom_Var	6	6	1	100	5+	90-100	Hom_Var	11	11	1	100	Threshold2	Hom_Var	Hom_Var	10	10	1	100	concordant	HG2_PB_assemblyticsPBcR_27460.jpeg	Hom_Var	5+	90-100	concordant	concordant	v0.6_Call	DEL 9:132026714-132028040	DEL	1000-5999	Hom_Var
HG3_PB_SVrefine2Falcon1Dovetail_702	1	1481	Deletion	212471135	212472616	975	Hom_Var	5	5	1	100	5+	90-100	Hom_Var	10	11	0.909091	90.9091	Threshold2	Hom_Var	Hom_Var	10	10	1	100	concordant	HG3_PB_SVrefine2Falcon1Dovetail_702.jpeg	Hom_Var	5+	90-100	concordant	concordant	v0.6_Call	DEL 1:212471135-212472616	DEL	1000-5999	Hom_Var
HG3_Ill_Krunchall_14242	9	2570	Deletion	110018288	110020858	977	Hom_Var	9	9	1	100	5+	90-100	Hom_Var	13	13	1	100	Threshold2	Hom_Var	Hom_Var	13	13	1	100	concordant	HG3_Ill_Krunchall_14242.jpeg	Hom_Var	5+	90-100	concordant	concordant	v0.6_Call	DEL 9:110018288-110020858	DEL	1000-5999	Hom_Var
HG2_PB_pbsv_15493	15	2925	Deletion	68426002	68428927	1078	Hom_Var	8	8	1	100	5+	90-100	Hom_Var	16	16	1	100	Threshold2	Hom_Var	Hom_Var	15	15	1	100	concordant	HG2_PB_pbsv_15493.jpeg	Hom_Var	5+	90-100	concordant	concordant	v0.6_Call	DEL 15:68426002-68428927	DEL	1000-5999	Hom_Var
HG2_10X_SVrefine210Xhap12_5723	7	2961	Deletion	32390151	32393112	1162	Hom_Var	8	8	1	100	5+	90-100	Hom_Var	15	15	1	100	Threshold2	Hom_Var	Hom_Var	13	13	1	100	concordant	HG2_10X_SVrefine210Xhap12_5723.jpeg	Hom_Var	5+	90-100	concordant	concordant	v0.6_Call	DEL 7:32390151-32393112	DEL	1000-5999	Hom_Var
HG2_PB_pbsv_4458	4	2231	Deletion	46202795	46205026	1176	Hom_Var	8	8	1	100	5+	90-100	Hom_Var	12	12	1	100	Threshold2	Hom_Var	Hom_Var	11	11	1	100	concordant	HG2_PB_pbsv_4458.jpeg	Hom_Var	5+	90-100	concordant	concordant	v0.6_Call	DEL 4:46202795-46205026	DEL	1000-5999	Hom_Var
HG2_10X_SVrefine210Xhap12_7623	9	2450	Deletion	140253510	140255960	1276	Hom_Var	11	11	1	100	5+	90-100	Hom_Var	17	18	0.944444	94.4444	Threshold2	Hom_Var	Hom_Var	16	16	1	100	concordant	HG2_10X_SVrefine210Xhap12_7623.jpeg	Hom_Var	5+	90-100	concordant	concordant	v0.6_Call	DEL 9:140253510-140255960	DEL	1000-5999	Hom_Var
HG2_PB_pbsv_13044	12	102	Deletion	22047473	22047575	37	Het_Var	15	15	1	100	5+	90-100	Het_Var	27	29	0.931034	93.1034	Threshold2	Het_Var	Het_Var	23	23	1	100	concordant	HG2_PB_pbsv_13044.jpeg	Het_Var	5+	90-100	concordant	concordant	v0.6_Call	DEL 12:22047473-22047575	DEL	100-300	Het_Var
HG4_PB_assemblyticsfalcon_15802	21	288	Deletion	24742245	24742533	543	Het_Var	6	6	1	100	5+	90-100	Het_Var	11	12	0.916667	91.6667	Threshold2	Het_Var	Het_Var	10	10	1	100	concordant	HG4_PB_assemblyticsfalcon_15802.jpeg	Het_Var	5+	90-100	concordant	concordant	v0.6_Call	DEL 21:24742245-24742533	DEL	100-300	Het_Var
HG2_Ill_SVrefine2DISCOVARplusDovetail_2519	12	184	Deletion	1480620	1480804	575	Het_Var	9	9	1	100	5+	90-100	Het_Var	16	17	0.941176	94.1176	Threshold2	Het_Var	Het_Var	13	13	1	100	concordant	HG2_Ill_SVrefine2DISCOVARplusDovetail_2519.jpeg	Het_Var	5+	90-100	concordant	concordant	v0.6_Call	DEL 12:1480620-1480804	DEL	100-300	Het_Var
HG2_PB_pbsv_350	1	126	Deletion	31649777	31649903	646	Het_Var	8	8	1	100	5+	90-100	Het_Var	12	12	1	100	Threshold2	Het_Var	Het_Var	10	10	1	100	concordant	HG2_PB_pbsv_350.jpeg	Het_Var	5+	90-100	concordant	concordant	v0.6_Call	DEL 1:31649777-31649903	DEL	100-300	Het_Var
HG3_10X_allpass_3166	17	116	Deletion	17210787	17210903	759	Het_Var	9	9	1	100	5+	90-100	Het_Var	15	15	1	100	Threshold2	Het_Var	Het_Var	15	15	1	100	concordant	HG3_10X_allpass_3166.jpeg	Het_Var	5+	90-100	concordant	concordant	v0.6_Call	DEL 17:17210787-17210903	DEL	100-300	Het_Var
HG2_PB_assemblyticsPBcR_1357	1	115	Deletion	171190122	171190237	830	Het_Var	7	7	1	100	5+	90-100	Het_Var	14	14	1	100	Threshold2	Het_Var	Het_Var	12	12	1	100	concordant	HG2_PB_assemblyticsPBcR_1357.jpeg	Het_Var	5+	90-100	concordant	concordant	v0.6_Call	DEL 1:171190122-171190237	DEL	100-300	Het_Var
HG3_Ill_GATKHCSBGrefine_12080	20	133	Deletion	54213954	54214087	843	Het_Var	7	7	1	100	5+	90-100	Het_Var	14	14	1	100	Threshold2	Het_Var	Het_Var	11	11	1	100	concordant	HG3_Ill_GATKHCSBGrefine_12080.jpeg	Het_Var	5+	90-100	concordant	concordant	v0.6_Call	DEL 20:54213954-54214087	DEL	100-300	Het_Var
HG4_PB_pbsv_14213	13	194	Deletion	83580472	83580666	883	Het_Var	6	6	1	100	5+	90-100	Het_Var	9	9	1	100	Threshold2	Het_Var	Het_Var	8	8	1	100	concordant	HG4_PB_pbsv_14213.jpeg	Het_Var	5+	90-100	concordant	concordant	v0.6_Call	DEL 13:83580472-83580666	DEL	100-300	Het_Var
HG2_PB_pbsv_6075	5	267	Deletion	114393663	114393930	959	Het_Var	7	7	1	100	5+	90-100	Het_Var	12	12	1	100	Threshold2	Het_Var	Het_Var	11	11	1	100	concordant	HG2_PB_pbsv_6075.jpeg	Het_Var	5+	90-100	concordant	concordant	v0.6_Call	DEL 5:114393663-114393930	DEL	100-300	Het_Var
HG2_PB_SVrefine2Falcon1plusDovetail_9050	4	102	Deletion	156935103	156935205	1031	Het_Var	6	6	1	100	5+	90-100	Het_Var	12	12	1	100	Threshold2	Het_Var	Het_Var	10	10	1	100	concordant	HG2_PB_SVrefine2Falcon1plusDovetail_9050.jpeg	Het_Var	5+	90-100	concordant	concordant	v0.6_Call	DEL 4:156935103-156935205	DEL	100-300	Het_Var
HG2_Ill_breakscan11_145	1	269	Deletion	225256531	225256800	1066	Het_Var	6	6	1	100	5+	90-100	Het_Var	13	14	0.928571	92.8571	Threshold2	Het_Var	Het_Var	11	11	1	100	concordant	HG2_Ill_breakscan11_145.jpeg	Het_Var	5+	90-100	concordant	concordant	v0.6_Call	DEL 1:225256531-225256800	DEL	100-300	Het_Var
HG2_PB_pbsv_12264	11	218	Deletion	41363517	41363735	1121	Het_Var	8	8	1	100	5+	90-100	Het_Var	15	15	1	100	Threshold2	Het_Var	Het_Var	14	14	1	100	concordant	HG2_PB_pbsv_12264.jpeg	Het_Var	5+	90-100	concordant	concordant	v0.6_Call	DEL 11:41363517-41363735	DEL	100-300	Het_Var
HG3_Ill_scalpel_1391	1	263	Deletion	241586225	241586488	1154	Het_Var	7	7	1	100	5+	90-100	Het_Var	13	13	1	100	Threshold2	Het_Var	Het_Var	13	13	1	100	concordant	HG3_Ill_scalpel_1391.jpeg	Het_Var	5+	90-100	concordant	concordant	v0.6_Call	DEL 1:241586225-241586488	DEL	100-300	Het_Var
HG4_Ill_Cortex_2920	5	149	Deletion	54081758	54081907	1199	Het_Var	6	6	1	100	5+	90-100	Het_Var	13	13	1	100	Threshold2	Het_Var	Het_Var	13	13	1	100	concordant	HG4_Ill_Cortex_2920.jpeg	Het_Var	5+	90-100	concordant	concordant	v0.6_Call	DEL 5:54081758-54081907	DEL	100-300	Het_Var
HG2_Ill_SVrefine2DISCOVARplusDovetail_1985	11	136	Deletion	25772979	25773115	315	Hom_Var	5	5	1	100	5+	90-100	Hom_Var	9	9	1	100	Threshold2	Hom_Var	Hom_Var	9	9	1	100	concordant	HG2_Ill_SVrefine2DISCOVARplusDovetail_1985.jpeg	Hom_Var	5+	90-100	concordant	concordant	v0.6_Call	DEL 11:25772979-25773115	DEL	100-300	Hom_Var
HG3_PB_pbsv_18784	21	266	Deletion	26825136	26825402	740	Hom_Var	6	6	1	100	5+	90-100	Hom_Var	12	12	1	100	Threshold2	Hom_Var	Hom_Var	9	9	1	100	concordant	HG3_PB_pbsv_18784.jpeg	Hom_Var	5+	90-100	concordant	concordant	v0.6_Call	DEL 21:26825136-26825402	DEL	100-300	Hom_Var
HG4_PB_SVrefine2PBcRDovetail_6581	12	122	Deletion	40864969	40865091	1197	Hom_Var	8	8	1	100	5+	90-100	Hom_Var	16	16	1	100	Threshold2	Hom_Var	Hom_Var	13	13	1	100	concordant	HG4_PB_SVrefine2PBcRDovetail_6581.jpeg	Hom_Var	5+	90-100	concordant	concordant	v0.6_Call	DEL 12:40864969-40865091	DEL	100-300	Hom_Var
HG4_PB_SVrefine2PBcRDovetail_6493	12	6316	Insertion	164696	171012	522	Het_Var	3	5	0.6	60	2018-03-04	50-60	Het_Var	5	10	0.5	50	Threshold2	Het_Var	Het_Var	5	8	0.625	62.5	concordant	HG4_PB_SVrefine2PBcRDovetail_6493.jpeg	omitted_region	5+	60-70	concordant	discordant	Omitted_Call	INS 12:164696-171012	INS	6000+	Het_Var
HG3_PB_SVrefine2PBcRDovetail_3246	6	27834	Insertion	80084902	80112736	130	Hom_Ref	3	4	0.75	75	2018-03-04	70-80	Hom_Ref	5	8	0.625	62.5	Threshold2	Hom_Ref	Hom_Ref	5	8	0.625	62.5	concordant	HG3_PB_SVrefine2PBcRDovetail_3246.jpeg	Hom_Var	5+	60-70	concordant	discordant	v0.6_Call	INS 6:80084902-80112736	INS	6000+	Hom_Ref
HG3_Ill_SVrefine2DISCOVARDovetail_8650	10	63	Insertion	132418330	132418393	445	Hom_Ref	3	4	0.75	75	2018-03-04	70-80	Hom_Ref	6	10	0.6	60	Threshold2	Hom_Ref	Hom_Ref	5	8	0.625	62.5	concordant	HG3_Ill_SVrefine2DISCOVARDovetail_8650.jpeg	omitted_region	5+	60-70	concordant	discordant	Omitted_Call	INS 10:132418330-132418393	INS	50-100	Hom_Ref
HG2_PB_PB10Xdip_29878	8	85	Insertion	26073980	26074065	309	Hom_Var	3	5	0.6	60	2018-03-04	50-60	Hom_Var	6	11	0.545455	54.5455	Threshold2	Hom_Var	Hom_Var	5	8	0.625	62.5	concordant	HG2_PB_PB10Xdip_29878.jpeg	omitted_region	5+	60-70	concordant	discordant	Omitted_Call	INS 8:26073980-26074065	INS	50-100	Hom_Var
HG3_PB_SVrefine2Falcon1Dovetail_8789	13	454	Insertion	113377599	113378053	229	Another_Var	3	6	0.5	50	2018-03-04	40-50	Another_Var	6	10	0.6	60	Threshold2	Another_Var	Another_Var	5	8	0.625	62.5	concordant	HG3_PB_SVrefine2Falcon1Dovetail_8789.jpeg	omitted_region	5+	60-70	concordant	discordant	Omitted_Call	INS 13:113377599-113378053	INS	400-1000	Another_Var
HG4_PB_assemblyticsfalcon_22142	6	428	Insertion	24238328	24238756	875	Another_Var	5	5	1	100	5+	90-100	Another_Var	5	10	0.5	50	Threshold2	Another_Var	Another_Var	5	8	0.625	62.5	concordant	HG4_PB_assemblyticsfalcon_22142.jpeg	omitted_region	5+	60-70	concordant	discordant	Omitted_Call	INS 6:24238328-24238756	INS	400-1000	Another_Var
HG2_PB_PB10Xdip_29976	8	304	Insertion	37932524	37932828	724	Het_Var	4	7	0.571429	57.1429	2018-03-04	50-60	Het_Var	6	9	0.666667	66.6667	Threshold2	Het_Var	Het_Var	5	8	0.625	62.5	concordant	HG2_PB_PB10Xdip_29976.jpeg	omitted_region	5+	60-70	concordant	discordant	Omitted_Call	INS 8:37932524-37932828	INS	300-400	Het_Var
HG4_Ill_250bpfermikitraw_9772	6	35	Insertion	67962852	67962887	292	Hom_Ref	2	4	0.5	50	2018-01-02	40-50	Hom_Ref	6	10	0.6	60	Threshold2	Hom_Ref	Hom_Ref	5	8	0.625	62.5	concordant	HG4_Ill_250bpfermikitraw_9772.jpeg	omitted_region	5+	60-70	concordant	discordant	Omitted_Call	INS 6:67962852-67962887	INS	20-50	Hom_Ref
HG2_Ill_SpiralSDKrefine_361	1	23	Insertion	58072265	58072288	770	Hom_Ref	3	5	0.6	60	2018-03-04	50-60	Hom_Ref	6	10	0.6	60	Threshold2	Hom_Ref	Hom_Ref	5	8	0.625	62.5	concordant	HG2_Ill_SpiralSDKrefine_361.jpeg	omitted_region	5+	60-70	concordant	discordant	Omitted_Call	INS 1:58072265-58072288	INS	20-50	Hom_Ref
HG2_PB_PB10Xdip_12238	16	101	Insertion	1163946	1164047	1060	Another_Var	5	5	1	100	5+	90-100	Another_Var	5	9	0.555556	55.5556	Threshold2	Another_Var	Another_Var	5	8	0.625	62.5	concordant	HG2_PB_PB10Xdip_12238.jpeg	omitted_region	5+	60-70	concordant	discordant	Omitted_Call	INS 16:1163946-1164047	INS	100-300	Another_Var
HG3_Ill_MetaSV_5159	8	105	Insertion	6363497	6363602	280	Hom_Ref	4	6	0.666667	66.6667	2018-03-04	60-70	Hom_Ref	5	9	0.555556	55.5556	Threshold2	Hom_Ref	Hom_Ref	5	8	0.625	62.5	concordant	HG3_Ill_MetaSV_5159.jpeg	omitted_region	5+	60-70	concordant	discordant	Omitted_Call	INS 8:6363497-6363602	INS	100-300	Hom_Ref
HG2_PB_PB10Xdip_4918	11	195	Insertion	11268282	11268477	570	Hom_Ref	3	4	0.75	75	2018-03-04	70-80	Hom_Ref	6	10	0.6	60	Threshold2	Hom_Ref	Hom_Ref	5	8	0.625	62.5	concordant	HG2_PB_PB10Xdip_4918.jpeg	omitted_region	5+	60-70	concordant	discordant	Omitted_Call	INS 11:11268282-11268477	INS	100-300	Hom_Ref
HG4_PB_assemblyticsfalcon_9007	15	513	Insertion	91198676	91199189	407	Another_Var	7	8	0.875	87.5	5+	80-90	Another_Var	7	11	0.636364	63.6364	Threshold2	Another_Var	Another_Var	7	11	0.636364	63.6364	concordant	HG4_PB_assemblyticsfalcon_9007.jpeg	omitted_region	5+	60-70	concordant	discordant	Omitted_Call	INS 15:91198676-91199189	INS	400-1000	Another_Var
HG2_PB_SVrefine2Falcon2Bionano_4671	8	906	Insertion	143583691	143584597	237	Hom_Var	3	6	0.5	50	2018-03-04	40-50	Hom_Var	7	11	0.636364	63.6364	Threshold2	Hom_Var	Hom_Var	7	11	0.636364	63.6364	concordant	HG2_PB_SVrefine2Falcon2Bionano_4671.jpeg	omitted_region	5+	60-70	concordant	discordant	Omitted_Call	INS 8:143583691-143584597	INS	400-1000	Hom_Var
HG3_Ill_scalpel_4399	4	32	Insertion	38346723	38346755	169	Hom_Ref	6	8	0.75	75	5+	70-80	Hom_Ref	10	16	0.625	62.5	Threshold2	Hom_Ref	Hom_Ref	9	14	0.642857	64.2857	concordant	HG3_Ill_scalpel_4399.jpeg	omitted_region	5+	60-70	concordant	discordant	Omitted_Call	INS 4:38346723-38346755	INS	20-50	Hom_Ref
HG2_PB_assemblyticsfalcon_13609	2	9711	Insertion	74019642	74029353	1221	Hom_Ref	2	2	1	100	2018-01-02	90-100	Hom_Ref	5	9	0.555556	55.5556	Threshold2	Hom_Ref	Hom_Ref	4	6	0.666667	66.6667	concordant	HG2_PB_assemblyticsfalcon_13609.jpeg	omitted_region	2018-03-04	60-70	concordant	discordant	Omitted_Call	INS 2:74019642-74029353	INS	6000+	Hom_Ref
HG3_PB_SVrefine2Falcon1Dovetail_7242	11	6855	Insertion	1092783	1099638	1020	Hom_Var	2	3	0.666667	66.6667	2018-01-02	60-70	Hom_Var	5	7	0.714286	71.4286	Threshold2	Hom_Var	Hom_Var	4	6	0.666667	66.6667	concordant	HG3_PB_SVrefine2Falcon1Dovetail_7242.jpeg	omitted_region	2018-03-04	60-70	concordant	discordant	Omitted_Call	INS 11:1092783-1099638	INS	6000+	Hom_Var
HG4_Ill_SVrefine2DISCOVARDovetail_3493	4	82	Insertion	69169375	69169457	125	Another_Var	6	8	0.75	75	5+	70-80	Another_Var	8	14	0.571429	57.1429	Threshold2	Another_Var	Another_Var	8	12	0.666667	66.6667	concordant	HG4_Ill_SVrefine2DISCOVARDovetail_3493.jpeg	omitted_region	5+	60-70	concordant	discordant	Omitted_Call	INS 4:69169375-69169457	INS	50-100	Another_Var
HG4_PB_HySA_1801	1	63	Insertion	221145005	221145068	664	Another_Var	1	2	0.5	50	2018-01-02	40-50	Another_Var	4	7	0.571429	57.1429	Threshold2	Another_Var	Another_Var	4	6	0.666667	66.6667	concordant	HG4_PB_HySA_1801.jpeg	omitted_region	2018-03-04	60-70	concordant	discordant	Omitted_Call	INS 1:221145005-221145068	INS	50-100	Another_Var
HG3_Ill_SVrefine2DISCOVARDovetail_7777	9	86	Insertion	100504316	100504402	329	Het_Var	4	5	0.8	80	2018-03-04	70-80	Het_Var	7	12	0.583333	58.3333	Threshold2	Het_Var	Het_Var	6	9	0.666667	66.6667	concordant	HG3_Ill_SVrefine2DISCOVARDovetail_7777.jpeg	omitted_region	5+	60-70	concordant	discordant	Omitted_Call	INS 9:100504316-100504402	INS	50-100	Het_Var
HG3_PB_assemblyticsfalcon_2050	1	87	Insertion	245719714	245719801	474	Het_Var	3	5	0.6	60	2018-03-04	50-60	Het_Var	4	8	0.5	50	Threshold2	Het_Var	Het_Var	4	6	0.666667	66.6667	concordant	HG3_PB_assemblyticsfalcon_2050.jpeg	omitted_region	2018-03-04	60-70	concordant	discordant	Omitted_Call	INS 1:245719714-245719801	INS	50-100	Het_Var
HG2_PB_PB10Xdip_29760	8	68	Insertion	216484	216552	825	Het_Var	5	7	0.714286	71.4286	5+	70-80	Het_Var	6	12	0.5	50	Threshold2	Het_Var	Het_Var	6	9	0.666667	66.6667	concordant	HG2_PB_PB10Xdip_29760.jpeg	omitted_region	5+	60-70	concordant	discordant	Omitted_Call	INS 8:216484-216552	INS	50-100	Het_Var
HG2_PB_assemblyticsPBcR_5062	12	767	Insertion	7002379	7003146	111	Another_Var	4	4	1	100	2018-03-04	90-100	Another_Var	4	7	0.571429	57.1429	Threshold2	Another_Var	Another_Var	4	6	0.666667	66.6667	concordant	HG2_PB_assemblyticsPBcR_5062.jpeg	omitted_region	2018-03-04	60-70	concordant	discordant	Omitted_Call	INS 12:7002379-7003146	INS	400-1000	Another_Var
HG3_PB_pbsv_9533	8	647	Insertion	131062543	131063190	392	Another_Var	3	4	0.75	75	2018-03-04	70-80	Another_Var	4	6	0.666667	66.6667	Threshold2	Another_Var	Another_Var	4	6	0.666667	66.6667	concordant	HG3_PB_pbsv_9533.jpeg	omitted_region	2018-03-04	60-70	concordant	discordant	Omitted_Call	INS 8:131062543-131063190	INS	400-1000	Another_Var
HG2_PB_assemblyticsPBcR_23948	7	637	Insertion	44294269	44294906	1235	Another_Var	4	5	0.8	80	2018-03-04	70-80	Another_Var	6	8	0.75	75	Threshold2	Another_Var	Another_Var	4	6	0.666667	66.6667	concordant	HG2_PB_assemblyticsPBcR_23948.jpeg	omitted_region	2018-03-04	60-70	concordant	discordant	Omitted_Call	INS 7:44294269-44294906	INS	400-1000	Another_Var
HG4_PB_SVrefine2Falcon1Dovetail_1699	2	825	Insertion	236077870	236078695	1134	Hom_Var	5	5	1	100	5+	90-100	Hom_Var	8	12	0.666667	66.6667	Threshold2	Hom_Var	Hom_Var	6	9	0.666667	66.6667	concordant	HG4_PB_SVrefine2Falcon1Dovetail_1699.jpeg	omitted_region	5+	60-70	concordant	discordant	Omitted_Call	INS 2:236077870-236078695	INS	400-1000	Hom_Var
HG4_PB_HySA_21725	14	332	Insertion	70212699	70213031	348	Hom_Ref	4	6	0.666667	66.6667	2018-03-04	60-70	Hom_Ref	7	11	0.636364	63.6364	Threshold2	Hom_Ref	Hom_Ref	6	9	0.666667	66.6667	concordant	HG4_PB_HySA_21725.jpeg	omitted_region	5+	60-70	concordant	discordant	Omitted_Call	INS 14:70212699-70213031	INS	300-400	Hom_Ref
HG2_PB_pbsv_956	1	315	Insertion	172541185	172541500	262	Hom_Var	4	5	0.8	80	2018-03-04	70-80	Hom_Var	7	12	0.583333	58.3333	Threshold2	Hom_Var	Hom_Var	6	9	0.666667	66.6667	concordant	HG2_PB_pbsv_956.jpeg	omitted_region	5+	60-70	concordant	discordant	Omitted_Call	INS 1:172541185-172541500	INS	300-400	Hom_Var
HG2_PB_PB10Xdip_25789	6	50	Insertion	55492948	55492998	150	Another_Var	4	6	0.666667	66.6667	2018-03-04	60-70	Another_Var	5	7	0.714286	71.4286	Threshold2	Another_Var	Another_Var	4	6	0.666667	66.6667	concordant	HG2_PB_PB10Xdip_25789.jpeg	omitted_region	2018-03-04	60-70	concordant	discordant	Omitted_Call	INS 6:55492948-55492998	INS	20-50	Another_Var
HG3_Ill_150bpfermikitraw_2864	2	28	Insertion	132529743	132529771	774	Another_Var	4	4	1	100	2018-03-04	90-100	Another_Var	5	7	0.714286	71.4286	Threshold2	Another_Var	Another_Var	4	6	0.666667	66.6667	concordant	HG3_Ill_150bpfermikitraw_2864.jpeg	omitted_region	2018-03-04	60-70	concordant	discordant	Omitted_Call	INS 2:132529743-132529771	INS	20-50	Another_Var
HG2_PB_assemblyticsfalcon_26785	8	33	Insertion	98709357	98709390	321	Het_Var	3	6	0.5	50	2018-03-04	40-50	Het_Var	6	11	0.545455	54.5455	Threshold2	Het_Var	Het_Var	6	9	0.666667	66.6667	concordant	HG2_PB_assemblyticsfalcon_26785.jpeg	omitted_region	5+	60-70	concordant	discordant	Omitted_Call	INS 8:98709357-98709390	INS	20-50	Het_Var
HG2_PB_HySA_29753	16	24	Insertion	87760119	87760143	787	Hom_Ref	3	4	0.75	75	2018-03-04	70-80	Hom_Ref	5	8	0.625	62.5	Threshold2	Hom_Ref	Hom_Ref	4	6	0.666667	66.6667	concordant	HG2_PB_HySA_29753.jpeg	Hom_Var	2018-03-04	60-70	concordant	discordant	v0.6_Call	INS 16:87760119-87760143	INS	20-50	Hom_Ref
HG3_PB_SVrefine2PBcRDovetail_4804	9	2544	Insertion	89201746	89204290	1240	Hom_Ref	4	5	0.8	80	2018-03-04	70-80	Hom_Ref	7	11	0.636364	63.6364	Threshold2	Hom_Ref	Hom_Ref	6	9	0.666667	66.6667	concordant	HG3_PB_SVrefine2PBcRDovetail_4804.jpeg	omitted_region	5+	60-70	concordant	discordant	Omitted_Call	INS 9:89201746-89204290	INS	1000-5999	Hom_Ref
HG4_PB_assemblyticsfalcon_26853	9	135	Insertion	6659865	6660000	1175	Complex_Var	2	4	0.5	50	2018-01-02	40-50	Complex_Var	4	8	0.5	50	Threshold2	Complex_Var	Complex_Var	4	6	0.666667	66.6667	concordant	HG4_PB_assemblyticsfalcon_26853.jpeg	omitted_region	2018-03-04	60-70	concordant	discordant	Omitted_Call	INS 9:6659865-6660000	INS	100-300	Complex_Var
HG4_PB_HySA_13099	7	247	Insertion	158430202	158430449	1243	Hom_Var	3	4	0.75	75	2018-03-04	70-80	Hom_Var	5	7	0.714286	71.4286	Threshold2	Hom_Var	Hom_Var	4	6	0.666667	66.6667	concordant	HG4_PB_HySA_13099.jpeg	omitted_region	2018-03-04	60-70	concordant	discordant	Omitted_Call	INS 7:158430202-158430449	INS	100-300	Hom_Var
HG2_Ill_GATKHC_16308	9	20	Insertion	14452436	14452456	11	Het_Var	7	9	0.777778	77.7778	5+	70-80	Het_Var	14	24	0.583333	58.3333	Threshold2	Het_Var	Het_Var	11	16	0.6875	68.75	concordant	HG2_Ill_GATKHC_16308.jpeg	omitted_region	5+	60-70	concordant	discordant	Omitted_Call	INS 9:14452436-14452456	INS	20-50	Het_Var
HG2_10X_SVrefine210Xhap12_76	1	365	Insertion	4827262	4827627	1116	Hom_Ref	7	10	0.7	70	5+	60-70	Hom_Ref	9	14	0.642857	64.2857	Threshold2	Hom_Ref	Hom_Ref	9	13	0.692308	69.2308	concordant	HG2_10X_SVrefine210Xhap12_76.jpeg	omitted_region	5+	60-70	concordant	discordant	Omitted_Call	INS 1:4827262-4827627	INS	300-400	Hom_Ref
HG2_PB_SVrefine2PBcRplusDovetail_11030	8	6383	Insertion	58123049	58129432	482	Hom_Var	4	5	0.8	80	2018-03-04	70-80	Hom_Var	8	13	0.615385	61.5385	Threshold2	Hom_Var	Hom_Var	7	10	0.7	70	concordant	HG2_PB_SVrefine2PBcRplusDovetail_11030.jpeg	omitted_region	5+	60-70	concordant	discordant	Omitted_Call	INS 8:58123049-58129432	INS	6000+	Hom_Var
HG4_PB_pbsv_12694	11	53	Insertion	119379585	119379638	136	Het_Var	5	7	0.714286	71.4286	5+	70-80	Het_Var	7	13	0.538462	53.8462	Threshold2	Het_Var	Het_Var	7	10	0.7	70	concordant	HG4_PB_pbsv_12694.jpeg	omitted_region	5+	60-70	concordant	discordant	Omitted_Call	INS 11:119379585-119379638	INS	50-100	Het_Var
HG3_PB_assemblyticsfalcon_18695	3	107	Insertion	197150542	197150649	929	Het_Var	5	7	0.714286	71.4286	5+	70-80	Het_Var	8	11	0.727273	72.7273	Threshold2	Het_Var	Het_Var	7	10	0.7	70	concordant	HG3_PB_assemblyticsfalcon_18695.jpeg	omitted_region	5+	60-70	concordant	discordant	Omitted_Call	INS 3:197150542-197150649	INS	100-300	Het_Var
HG2_PB_PB10Xdip_6925	12	6356	Insertion	164696	171052	1152	Het_Var	2	2	1	100	2018-01-02	90-100	Het_Var	5	9	0.555556	55.5556	Threshold2	Het_Var	Het_Var	5	7	0.714286	71.4286	concordant	HG2_PB_PB10Xdip_6925.jpeg	omitted_region	5+	70-80	concordant	discordant	Omitted_Call	INS 12:164696-171052	INS	6000+	Het_Var
HG2_PB_PB10Xdip_20744	3	8150	Insertion	47825834	47833984	1027	Hom_Var	3	3	1	100	2018-03-04	90-100	Hom_Var	6	8	0.75	75	Threshold2	Hom_Var	Hom_Var	5	7	0.714286	71.4286	concordant	HG2_PB_PB10Xdip_20744.jpeg	omitted_region	5+	70-80	concordant	discordant	Omitted_Call	INS 3:47825834-47833984	INS	6000+	Hom_Var
HG2_Ill_svaba_2510	2	54	Insertion	91750731	91750785	202	Another_Var	5	7	0.714286	71.4286	5+	70-80	Another_Var	5	9	0.555556	55.5556	Threshold2	Another_Var	Another_Var	5	7	0.714286	71.4286	concordant	HG2_Ill_svaba_2510.jpeg	omitted_region	5+	70-80	concordant	discordant	Omitted_Call	INS 2:91750731-91750785	INS	50-100	Another_Var
HG2_PB_assemblyticsfalcon_28247	9	484	Insertion	134839700	134840184	26	Another_Var	8	8	1	100	5+	90-100	Another_Var	11	19	0.578947	57.8947	Threshold2	Another_Var	Another_Var	10	14	0.714286	71.4286	concordant	HG2_PB_assemblyticsfalcon_28247.jpeg	omitted_region	5+	70-80	concordant	discordant	Omitted_Call	INS 9:134839700-134840184	INS	400-1000	Another_Var
HG2_PB_PB10Xdip_31647	9	430	Insertion	76898277	76898707	823	Another_Var	3	4	0.75	75	2018-03-04	70-80	Another_Var	5	7	0.714286	71.4286	Threshold2	Another_Var	Another_Var	5	7	0.714286	71.4286	concordant	HG2_PB_PB10Xdip_31647.jpeg	omitted_region	5+	70-80	concordant	discordant	Omitted_Call	INS 9:76898277-76898707	INS	400-1000	Another_Var
HG3_PB_pbsv_8476	7	339	Insertion	149739248	149739587	462	Another_Var	5	5	1	100	5+	90-100	Another_Var	5	9	0.555556	55.5556	Threshold2	Another_Var	Another_Var	5	7	0.714286	71.4286	concordant	HG3_PB_pbsv_8476.jpeg	omitted_region	5+	70-80	concordant	discordant	Omitted_Call	INS 7:149739248-149739587	INS	300-400	Another_Var
HG2_PB_PB10Xdip_23457	5	343	Insertion	177388504	177388847	1092	Another_Var	4	5	0.8	80	2018-03-04	70-80	Another_Var	5	9	0.555556	55.5556	Threshold2	Another_Var	Another_Var	5	7	0.714286	71.4286	concordant	HG2_PB_PB10Xdip_23457.jpeg	omitted_region	5+	70-80	concordant	discordant	Omitted_Call	INS 5:177388504-177388847	INS	300-400	Another_Var
HG2_PB_SVrefine2PB10Xhap12_4794	6	358	Insertion	8254067	8254425	641	Het_Var	3	4	0.75	75	2018-03-04	70-80	Het_Var	5	9	0.555556	55.5556	Threshold2	Het_Var	Het_Var	5	7	0.714286	71.4286	concordant	HG2_PB_SVrefine2PB10Xhap12_4794.jpeg	omitted_region	5+	70-80	concordant	discordant	Omitted_Call	INS 6:8254067-8254425	INS	300-400	Het_Var
HG3_PB_pbsv_6484	6	323	Insertion	27068461	27068784	866	Hom_Var	4	4	1	100	2018-03-04	90-100	Hom_Var	5	7	0.714286	71.4286	Threshold2	Hom_Var	Hom_Var	5	7	0.714286	71.4286	concordant	HG3_PB_pbsv_6484.jpeg	omitted_region	5+	70-80	concordant	discordant	Omitted_Call	INS 6:27068461-27068784	INS	300-400	Hom_Var
HG2_PB_assemblyticsfalcon_10226	17	1384	Insertion	42503	43887	438	Another_Var	3	3	1	100	2018-03-04	90-100	Another_Var	6	9	0.666667	66.6667	Threshold2	Another_Var	Another_Var	5	7	0.714286	71.4286	concordant	HG2_PB_assemblyticsfalcon_10226.jpeg	omitted_region	5+	70-80	concordant	discordant	Omitted_Call	INS 17:42503-43887	INS	1000-5999	Another_Var
HG4_PB_SVrefine2Falcon1Dovetail_103	1	1155	Insertion	6065324	6066479	612	Another_Var	4	5	0.8	80	2018-03-04	70-80	Another_Var	5	8	0.625	62.5	Threshold2	Another_Var	Another_Var	5	7	0.714286	71.4286	concordant	HG4_PB_SVrefine2Falcon1Dovetail_103.jpeg	omitted_region	5+	70-80	concordant	discordant	Omitted_Call	INS 1:6065324-6066479	INS	1000-5999	Another_Var
HG2_Ill_breakscan11_2977	1	1995	Insertion	44370532	44372527	949	Another_Var	5	5	1	100	5+	90-100	Another_Var	5	9	0.555556	55.5556	Threshold2	Another_Var	Another_Var	5	7	0.714286	71.4286	concordant	HG2_Ill_breakscan11_2977.jpeg	omitted_region	5+	70-80	concordant	discordant	Omitted_Call	INS 1:44370532-44372527	INS	1000-5999	Another_Var
HG3_PB_SVrefine2PBcRDovetail_3824	7	196	Insertion	104464602	104464798	460	Hom_Var	3	4	0.75	75	2018-03-04	70-80	Hom_Var	5	8	0.625	62.5	Threshold2	Hom_Var	Hom_Var	5	7	0.714286	71.4286	concordant	HG3_PB_SVrefine2PBcRDovetail_3824.jpeg	omitted_region	5+	70-80	concordant	discordant	Omitted_Call	INS 7:104464602-104464798	INS	100-300	Hom_Var
HG3_Ill_GATKHC_23109	14	74	Insertion	19555265	19555339	1185	Another_Var	7	8	0.875	87.5	5+	80-90	Another_Var	8	11	0.727273	72.7273	Threshold2	Another_Var	Another_Var	8	11	0.727273	72.7273	concordant	HG3_Ill_GATKHC_23109.jpeg	omitted_region	5+	70-80	concordant	discordant	Omitted_Call	INS 14:19555265-19555339	INS	50-100	Another_Var
HG2_CG_vcfBeta_6703	10	24	Insertion	128107835	128107859	350	Hom_Ref	6	8	0.75	75	5+	70-80	Hom_Ref	8	13	0.615385	61.5385	Threshold2	Hom_Ref	Hom_Ref	8	11	0.727273	72.7273	concordant	HG2_CG_vcfBeta_6703.jpeg	omitted_region	5+	70-80	concordant	discordant	Omitted_Call	INS 10:128107835-128107859	INS	20-50	Hom_Ref
HG2_PB_HySA_12789	6	6006	Insertion	58223983	58229989	771	Hom_Ref	7	9	0.777778	77.7778	5+	70-80	Hom_Ref	10	14	0.714286	71.4286	Threshold2	Hom_Ref	Hom_Ref	9	12	0.75	75	concordant	HG2_PB_HySA_12789.jpeg	omitted_region	5+	70-80	concordant	discordant	Omitted_Call	INS 6:58223983-58229989	INS	6000+	Hom_Ref
HG4_PB_SVrefine2Falcon1Dovetail_2046	3	10165	Insertion	75463359	75473524	768	Hom_Var	2	2	1	100	2018-01-02	90-100	Hom_Var	3	5	0.6	60	Threshold2	Hom_Var	Hom_Var	3	4	0.75	75	concordant	HG4_PB_SVrefine2Falcon1Dovetail_2046.jpeg	omitted_region	2018-03-04	70-80	concordant	discordant	Omitted_Call	INS 3:75463359-75473524	INS	6000+	Hom_Var
HG2_PB_PB10Xdip_24614	6	88	Insertion	129706290	129706378	230	Another_Var	6	6	1	100	5+	90-100	Another_Var	6	9	0.666667	66.6667	Threshold2	Another_Var	Another_Var	6	8	0.75	75	concordant	HG2_PB_PB10Xdip_24614.jpeg	omitted_region	5+	70-80	concordant	discordant	Omitted_Call	INS 6:129706290-129706378	INS	50-100	Another_Var
HG2_PB_HySA_4318	2	63	Insertion	133152239	133152302	962	Another_Var	3	4	0.75	75	2018-03-04	70-80	Another_Var	3	4	0.75	75	Threshold2	Another_Var	Another_Var	3	4	0.75	75	concordant	HG2_PB_HySA_4318.jpeg	omitted_region	2018-03-04	70-80	concordant	discordant	Omitted_Call	INS 2:133152239-133152302	INS	50-100	Another_Var
HG4_PB_pbsv_6135	5	68	Insertion	120391221	120391289	618	Het_Var	5	5	1	100	5+	90-100	Het_Var	6	10	0.6	60	Threshold2	Het_Var	Het_Var	6	8	0.75	75	concordant	HG4_PB_pbsv_6135.jpeg	omitted_region	5+	70-80	concordant	discordant	Omitted_Call	INS 5:120391221-120391289	INS	50-100	Het_Var
HG2_PB_HySA_14184	7	94	Insertion	821754	821848	835	Het_Var	2	4	0.5	50	2018-01-02	40-50	Het_Var	6	9	0.666667	66.6667	Threshold2	Het_Var	Het_Var	6	8	0.75	75	concordant	HG2_PB_HySA_14184.jpeg	omitted_region	5+	70-80	concordant	discordant	Omitted_Call	INS 7:821754-821848	INS	50-100	Het_Var
HG3_Ill_SVrefine2DISCOVARDovetail_869	1	54	Insertion	225942553	225942607	1239	Hom_Ref	5	5	1	100	5+	90-100	Hom_Ref	6	8	0.75	75	Threshold2	Hom_Ref	Hom_Ref	6	8	0.75	75	concordant	HG3_Ill_SVrefine2DISCOVARDovetail_869.jpeg	omitted_region	5+	70-80	concordant	discordant	Omitted_Call	INS 1:225942553-225942607	INS	50-100	Hom_Ref
HG4_PB_SVrefine2Falcon1Dovetail_5458	8	623	Insertion	543702	544325	1209	Hom_Ref	2	3	0.666667	66.6667	2018-01-02	60-70	Hom_Ref	4	6	0.666667	66.6667	Threshold2	Hom_Ref	Hom_Ref	3	4	0.75	75	concordant	HG4_PB_SVrefine2Falcon1Dovetail_5458.jpeg	omitted_region	2018-03-04	70-80	concordant	discordant	Omitted_Call	INS 8:543702-544325	INS	400-1000	Hom_Ref
HG2_Ill_SVrefine2DISCOVARplusDovetail_9223	4	429	Insertion	7132451	7132880	162	Hom_Var	1	1	1	100	2018-01-02	90-100	Hom_Var	5	7	0.714286	71.4286	Threshold2	Hom_Var	Hom_Var	3	4	0.75	75	concordant	HG2_Ill_SVrefine2DISCOVARplusDovetail_9223.jpeg	omitted_region	2018-03-04	70-80	concordant	discordant	Omitted_Call	INS 4:7132451-7132880	INS	400-1000	Hom_Var
HG4_Ill_GATKHC_17194	9	24	Insertion	126109959	126109983	105	Another_Var	6	7	0.857143	85.7143	5+	80-90	Another_Var	6	9	0.666667	66.6667	Threshold2	Another_Var	Another_Var	6	8	0.75	75	concordant	HG4_Ill_GATKHC_17194.jpeg	omitted_region	5+	70-80	concordant	discordant	Omitted_Call	INS 9:126109959-126109983	INS	20-50	Another_Var
HG3_Ill_FB_10972	11	30	Insertion	116683167	116683197	937	Another_Var	5	5	1	100	5+	90-100	Another_Var	6	9	0.666667	66.6667	Threshold2	Another_Var	Another_Var	6	8	0.75	75	concordant	HG3_Ill_FB_10972.jpeg	omitted_region	5+	70-80	concordant	discordant	Omitted_Call	INS 11:116683167-116683197	INS	20-50	Another_Var
HG2_PB_SVrefine2PBcRplusDovetail_1188	10	1073	Insertion	42673047	42674120	282	Het_Var	2	2	1	100	2018-01-02	90-100	Het_Var	3	6	0.5	50	Threshold2	Het_Var	Het_Var	3	4	0.75	75	concordant	HG2_PB_SVrefine2PBcRplusDovetail_1188.jpeg	omitted_region	2018-03-04	70-80	concordant	discordant	Omitted_Call	INS 10:42673047-42674120	INS	1000-5999	Het_Var
HG3_PB_SVrefine2Falcon1Dovetail_2159	3	2599	Insertion	94511817	94514416	887	Het_Var	4	4	1	100	2018-03-04	90-100	Het_Var	6	9	0.666667	66.6667	Threshold2	Het_Var	Het_Var	6	8	0.75	75	concordant	HG3_PB_SVrefine2Falcon1Dovetail_2159.jpeg	omitted_region	5+	70-80	concordant	discordant	Omitted_Call	INS 3:94511817-94514416	INS	1000-5999	Het_Var
HG3_PB_SVrefine2Falcon1Dovetail_7721	11	3076	Insertion	118292481	118295557	173	Hom_Var	5	5	1	100	5+	90-100	Hom_Var	6	9	0.666667	66.6667	Threshold2	Hom_Var	Hom_Var	6	8	0.75	75	concordant	HG3_PB_SVrefine2Falcon1Dovetail_7721.jpeg	omitted_region	5+	70-80	concordant	discordant	Omitted_Call	INS 11:118292481-118295557	INS	1000-5999	Hom_Var
HG4_Ill_SVrefine2DISCOVARDovetail_10344	14	106	Insertion	30158154	30158260	256	Hom_Ref	4	5	0.8	80	2018-03-04	70-80	Hom_Ref	6	10	0.6	60	Threshold2	Hom_Ref	Hom_Ref	6	8	0.75	75	concordant	HG4_Ill_SVrefine2DISCOVARDovetail_10344.jpeg	omitted_region	5+	70-80	concordant	discordant	Omitted_Call	INS 14:30158154-30158260	INS	100-300	Hom_Ref
HG2_PB_SVrefine2Falcon2Bionano_7261	13	136	Insertion	113761552	113761688	1190	Hom_Ref	1	1	1	100	2018-01-02	90-100	Hom_Ref	3	6	0.5	50	Threshold2	Hom_Ref	Hom_Ref	3	4	0.75	75	concordant	HG2_PB_SVrefine2Falcon2Bionano_7261.jpeg	omitted_region	2018-03-04	70-80	concordant	discordant	Omitted_Call	INS 13:113761552-113761688	INS	100-300	Hom_Ref
HG3_PB_assemblyticsfalcon_3779	11	269	Insertion	1894043	1894312	1289	Hom_Ref	3	4	0.75	75	2018-03-04	70-80	Hom_Ref	7	10	0.7	70	Threshold2	Hom_Ref	Hom_Ref	6	8	0.75	75	concordant	HG3_PB_assemblyticsfalcon_3779.jpeg	omitted_region	5+	70-80	concordant	discordant	Omitted_Call	INS 11:1894043-1894312	INS	100-300	Hom_Ref
HG3_Ill_GATKHCSBGrefine_2563	3	138	Insertion	159398495	159398633	222	Hom_Var	4	5	0.8	80	2018-03-04	70-80	Hom_Var	6	11	0.545455	54.5455	Threshold2	Hom_Var	Hom_Var	6	8	0.75	75	concordant	HG3_Ill_GATKHCSBGrefine_2563.jpeg	omitted_region	5+	70-80	concordant	discordant	Omitted_Call	INS 3:159398495-159398633	INS	100-300	Hom_Var
HG2_Ill_SVrefine2DISCOVARplusDovetail_244	1	71	Insertion	35752373	35752444	562	Hom_Ref	5	5	1	100	5+	90-100	Hom_Ref	8	11	0.727273	72.7273	Threshold2	Hom_Ref	Hom_Ref	7	9	0.777778	77.7778	concordant	HG2_Ill_SVrefine2DISCOVARplusDovetail_244.jpeg	omitted_region	5+	70-80	concordant	discordant	Omitted_Call	INS 1:35752373-35752444	INS	50-100	Hom_Ref
HG4_PB_assemblyticsfalcon_17382	3	364	Insertion	76779664	76780028	712	Another_Var	5	7	0.714286	71.4286	5+	70-80	Another_Var	8	10	0.8	80	Threshold2	Another_Var	Another_Var	7	9	0.777778	77.7778	concordant	HG4_PB_assemblyticsfalcon_17382.jpeg	omitted_region	5+	70-80	concordant	discordant	Omitted_Call	INS 3:76779664-76780028	INS	300-400	Another_Var
HG2_PB_assemblyticsfalcon_4986	11	305	Insertion	126903173	126903478	502	Het_Var	4	5	0.8	80	2018-03-04	70-80	Het_Var	7	10	0.7	70	Threshold2	Het_Var	Het_Var	7	9	0.777778	77.7778	concordant	HG2_PB_assemblyticsfalcon_4986.jpeg	omitted_region	5+	70-80	concordant	discordant	Omitted_Call	INS 11:126903173-126903478	INS	300-400	Het_Var
HG2_PB_SVrefine2PBcRplusDovetail_9780	6	380	Insertion	141033257	141033637	854	Hom_Var	4	4	1	100	2018-03-04	90-100	Hom_Var	8	11	0.727273	72.7273	Threshold2	Hom_Var	Hom_Var	7	9	0.777778	77.7778	concordant	HG2_PB_SVrefine2PBcRplusDovetail_9780.jpeg	omitted_region	5+	70-80	concordant	discordant	Omitted_Call	INS 6:141033257-141033637	INS	300-400	Hom_Var
HG3_PB_HySA_24169	16	7830	Insertion	29627120	29634950	34	Hom_Ref	9	12	0.75	75	5+	70-80	Hom_Ref	15	20	0.75	75	Threshold2	Hom_Ref	Hom_Ref	12	15	0.8	80	concordant	HG3_PB_HySA_24169.jpeg	omitted_region	5+	70-80	concordant	discordant	Omitted_Call	INS 16:29627120-29634950	INS	6000+	Hom_Ref
HG3_Ill_GATKHC_19970	11	56	Insertion	90948250	90948306	572	Another_Var	6	7	0.857143	85.7143	5+	80-90	Another_Var	8	12	0.666667	66.6667	Threshold2	Another_Var	Another_Var	8	10	0.8	80	concordant	HG3_Ill_GATKHC_19970.jpeg	omitted_region	5+	70-80	concordant	discordant	Omitted_Call	INS 11:90948250-90948306	INS	50-100	Another_Var
HG2_PB_PB10Xdip_9434	14	100	Insertion	105706105	105706205	561	Hom_Ref	1	1	1	100	2018-01-02	90-100	Hom_Ref	5	6	0.833333	83.3333	Threshold2	Hom_Ref	Hom_Ref	4	5	0.8	80	concordant	HG2_PB_PB10Xdip_9434.jpeg	omitted_region	2018-03-04	70-80	concordant	discordant	Omitted_Call	INS 14:105706105-105706205	INS	50-100	Hom_Ref
HG4_Ill_GATKHCSBGrefine_2459	3	58	Insertion	105327139	105327197	435	Hom_Var	5	5	1	100	5+	90-100	Hom_Var	8	10	0.8	80	Threshold2	Hom_Var	Hom_Var	8	10	0.8	80	concordant	HG4_Ill_GATKHCSBGrefine_2459.jpeg	omitted_region	5+	70-80	concordant	discordant	Omitted_Call	INS 3:105327139-105327197	INS	50-100	Hom_Var
HG4_PB_HySA_11237	6	528	Insertion	168961777	168962305	221	Another_Var	2	2	1	100	2018-01-02	90-100	Another_Var	4	6	0.666667	66.6667	Threshold2	Another_Var	Another_Var	4	5	0.8	80	concordant	HG4_PB_HySA_11237.jpeg	omitted_region	2018-03-04	70-80	concordant	discordant	Omitted_Call	INS 6:168961777-168962305	INS	400-1000	Another_Var
HG2_PB_SVrefine2Falcon2Bionano_7518	14	768	Insertion	104619771	104620539	1046	Another_Var	3	3	1	100	2018-03-04	90-100	Another_Var	4	7	0.571429	57.1429	Threshold2	Another_Var	Another_Var	4	5	0.8	80	concordant	HG2_PB_SVrefine2Falcon2Bionano_7518.jpeg	omitted_region	2018-03-04	70-80	concordant	discordant	Omitted_Call	INS 14:104619771-104620539	INS	400-1000	Another_Var
HG2_PB_SVrefine2PBcRplusDovetail_10116	7	813	Insertion	8192093	8192906	791	Hom_Var	1	1	1	100	2018-01-02	90-100	Hom_Var	4	7	0.571429	57.1429	Threshold2	Hom_Var	Hom_Var	4	5	0.8	80	concordant	HG2_PB_SVrefine2PBcRplusDovetail_10116.jpeg	omitted_region	2018-03-04	70-80	concordant	discordant	Omitted_Call	INS 7:8192093-8192906	INS	400-1000	Hom_Var
HG3_PB_pbsv_15426	16	367	Insertion	594811	595178	795	Hom_Var	3	4	0.75	75	2018-03-04	70-80	Hom_Var	5	6	0.833333	83.3333	Threshold2	Hom_Var	Hom_Var	4	5	0.8	80	concordant	HG3_PB_pbsv_15426.jpeg	omitted_region	2018-03-04	70-80	concordant	discordant	Omitted_Call	INS 16:594811-595178	INS	300-400	Hom_Var
HG3_Ill_250bpfermikitraw_4743	3	22	Insertion	101527698	101527720	453	Het_Var	3	3	1	100	2018-03-04	90-100	Het_Var	4	5	0.8	80	Threshold2	Het_Var	Het_Var	4	5	0.8	80	concordant	HG3_Ill_250bpfermikitraw_4743.jpeg	omitted_region	2018-03-04	70-80	concordant	discordant	Omitted_Call	INS 3:101527698-101527720	INS	20-50	Het_Var
HG4_PB_SVrefine2PBcRDovetail_5246	9	1870	Insertion	100791576	100793446	1111	Hom_Ref	6	7	0.857143	85.7143	5+	80-90	Hom_Ref	8	11	0.727273	72.7273	Threshold2	Hom_Ref	Hom_Ref	8	10	0.8	80	concordant	HG4_PB_SVrefine2PBcRDovetail_5246.jpeg	omitted_region	5+	70-80	concordant	discordant	Omitted_Call	INS 9:100791576-100793446	INS	1000-5999	Hom_Ref
HG3_PB_SVrefine2Falcon1Dovetail_247	1	1146	Insertion	35622361	35623507	921	Hom_Var	6	6	1	100	5+	90-100	Hom_Var	8	10	0.8	80	Threshold2	Hom_Var	Hom_Var	8	10	0.8	80	concordant	HG3_PB_SVrefine2Falcon1Dovetail_247.jpeg	omitted_region	5+	70-80	concordant	discordant	Omitted_Call	INS 1:35622361-35623507	INS	1000-5999	Hom_Var
HG2_PB_HySA_21591	10	126	Insertion	135147861	135147987	73	Another_Var	4	5	0.8	80	2018-03-04	70-80	Another_Var	5	6	0.833333	83.3333	Threshold2	Another_Var	Another_Var	4	5	0.8	80	concordant	HG2_PB_HySA_21591.jpeg	omitted_region	2018-03-04	70-80	concordant	discordant	Omitted_Call	INS 10:135147861-135147987	INS	100-300	Another_Var
HG2_PB_pbsv_12821	11	225	Insertion	134435548	134435773	187	Hom_Var	4	4	1	100	2018-03-04	90-100	Hom_Var	5	6	0.833333	83.3333	Threshold2	Hom_Var	Hom_Var	4	5	0.8	80	concordant	HG2_PB_pbsv_12821.jpeg	omitted_region	2018-03-04	70-80	concordant	discordant	Omitted_Call	INS 11:134435548-134435773	INS	100-300	Hom_Var
HG2_Ill_GATKHC_1306	1	51	Insertion	153133708	153133759	638	Another_Var	6	6	1	100	5+	90-100	Another_Var	9	13	0.692308	69.2308	Threshold2	Another_Var	Another_Var	9	11	0.818182	81.8182	concordant	HG2_Ill_GATKHC_1306.jpeg	omitted_region	5+	80-90	concordant	discordant	Omitted_Call	INS 1:153133708-153133759	INS	50-100	Another_Var
HG3_Ill_Krunchall_11655	7	56	Insertion	101975082	101975138	961	Het_Var	6	8	0.75	75	5+	70-80	Het_Var	9	13	0.692308	69.2308	Threshold2	Het_Var	Het_Var	9	11	0.818182	81.8182	concordant	HG3_Ill_Krunchall_11655.jpeg	omitted_region	5+	80-90	concordant	discordant	Omitted_Call	INS 7:101975082-101975138	INS	50-100	Het_Var
HG3_Ill_MetaSV_4587	6	348	Insertion	91125852	91126200	311	Hom_Ref	6	7	0.857143	85.7143	5+	80-90	Hom_Ref	9	12	0.75	75	Threshold2	Hom_Ref	Hom_Ref	9	11	0.818182	81.8182	concordant	HG3_Ill_MetaSV_4587.jpeg	omitted_region	5+	80-90	concordant	discordant	Omitted_Call	INS 6:91125852-91126200	INS	300-400	Hom_Ref
HG2_PB_PB10Xdip_28343	7	170	Insertion	58039822	58039992	1218	Hom_Ref	7	8	0.875	87.5	5+	80-90	Hom_Ref	9	12	0.75	75	Threshold2	Hom_Ref	Hom_Ref	9	11	0.818182	81.8182	concordant	HG2_PB_PB10Xdip_28343.jpeg	omitted_region	5+	80-90	concordant	discordant	Omitted_Call	INS 7:58039822-58039992	INS	100-300	Hom_Ref
HG4_PB_pbsv_3770	3	10959	Insertion	151383298	151394257	1195	Hom_Ref	2	3	0.666667	66.6667	2018-01-02	60-70	Hom_Ref	6	7	0.857143	85.7143	Threshold2	Hom_Ref	Hom_Ref	5	6	0.833333	83.3333	concordant	HG4_PB_pbsv_3770.jpeg	omitted_region	5+	80-90	concordant	discordant	Omitted_Call	INS 3:151383298-151394257	INS	6000+	Hom_Ref
HG2_PB_SVrefine2Falcon2Bionano_5360	10	8206	Insertion	27182398	27190604	459	Hom_Var	6	6	1	100	5+	90-100	Hom_Var	11	15	0.733333	73.3333	Threshold2	Hom_Var	Hom_Var	10	12	0.833333	83.3333	concordant	HG2_PB_SVrefine2Falcon2Bionano_5360.jpeg	omitted_region	5+	80-90	concordant	discordant	Omitted_Call	INS 10:27182398-27190604	INS	6000+	Hom_Var
HG2_PB_HySA_2804	2	56	Insertion	909141	909197	829	Another_Var	4	4	1	100	2018-03-04	90-100	Another_Var	5	7	0.714286	71.4286	Threshold2	Another_Var	Another_Var	5	6	0.833333	83.3333	concordant	HG2_PB_HySA_2804.jpeg	omitted_region	5+	80-90	concordant	discordant	Omitted_Call	INS 2:909141-909197	INS	50-100	Another_Var
HG3_Ill_SVrefine2DISCOVARDovetail_1676	2	51	Insertion	149479433	149479484	83	Hom_Ref	4	4	1	100	2018-03-04	90-100	Hom_Ref	7	9	0.777778	77.7778	Threshold2	Hom_Ref	Hom_Ref	5	6	0.833333	83.3333	concordant	HG3_Ill_SVrefine2DISCOVARDovetail_1676.jpeg	omitted_region	5+	80-90	concordant	discordant	Omitted_Call	INS 2:149479433-149479484	INS	50-100	Hom_Ref
HG2_PB_assemblyticsfalcon_3232	10	932	Insertion	103614823	103615755	168	Another_Var	5	5	1	100	5+	90-100	Another_Var	6	8	0.75	75	Threshold2	Another_Var	Another_Var	5	6	0.833333	83.3333	concordant	HG2_PB_assemblyticsfalcon_3232.jpeg	omitted_region	5+	80-90	concordant	discordant	Omitted_Call	INS 10:103614823-103615755	INS	400-1000	Another_Var
HG2_PB_SVrefine2Falcon2Bionano_7192	13	697	Insertion	108930907	108931604	382	Hom_Var	4	4	1	100	2018-03-04	90-100	Hom_Var	5	7	0.714286	71.4286	Threshold2	Hom_Var	Hom_Var	5	6	0.833333	83.3333	concordant	HG2_PB_SVrefine2Falcon2Bionano_7192.jpeg	omitted_region	5+	80-90	concordant	discordant	Omitted_Call	INS 13:108930907-108931604	INS	400-1000	Hom_Var
HG2_PB_pbsv_11696	10	361	Insertion	131212942	131213303	170	Het_Var	3	4	0.75	75	2018-03-04	70-80	Het_Var	6	8	0.75	75	Threshold2	Het_Var	Het_Var	5	6	0.833333	83.3333	concordant	HG2_PB_pbsv_11696.jpeg	omitted_region	5+	80-90	concordant	discordant	Omitted_Call	INS 10:131212942-131213303	INS	300-400	Het_Var
HG4_PB_HySA_1198	1	21	Insertion	145037922	145037943	466	Het_Var	3	3	1	100	2018-03-04	90-100	Het_Var	7	10	0.7	70	Threshold2	Het_Var	Het_Var	5	6	0.833333	83.3333	concordant	HG4_PB_HySA_1198.jpeg	omitted_region	5+	80-90	concordant	discordant	Omitted_Call	INS 1:145037922-145037943	INS	20-50	Het_Var
HG3_Ill_FB_3703	3	24	Insertion	196641432	196641456	486	Het_Var	3	3	1	100	2018-03-04	90-100	Het_Var	5	9	0.555556	55.5556	Threshold2	Het_Var	Het_Var	5	6	0.833333	83.3333	concordant	HG3_Ill_FB_3703.jpeg	omitted_region	5+	80-90	concordant	discordant	Omitted_Call	INS 3:196641432-196641456	INS	20-50	Het_Var
HG3_PB_assemblyticsfalcon_7547	13	29	Insertion	112962618	112962647	626	Hom_Ref	7	8	0.875	87.5	5+	80-90	Hom_Ref	10	12	0.833333	83.3333	Threshold2	Hom_Ref	Hom_Ref	10	12	0.833333	83.3333	concordant	HG3_PB_assemblyticsfalcon_7547.jpeg	omitted_region	5+	80-90	concordant	discordant	Omitted_Call	INS 13:112962618-112962647	INS	20-50	Hom_Ref
HG2_Ill_SVrefine2DISCOVARplusDovetail_13360	9	126	Insertion	4735224	4735350	610	Hom_Var	3	4	0.75	75	2018-03-04	70-80	Hom_Var	5	6	0.833333	83.3333	Threshold2	Hom_Var	Hom_Var	5	6	0.833333	83.3333	concordant	HG2_Ill_SVrefine2DISCOVARplusDovetail_13360.jpeg	omitted_region	5+	80-90	concordant	discordant	Omitted_Call	INS 9:4735224-4735350	INS	100-300	Hom_Var
HG2_PB_HySA_16594	8	279	Insertion	16102806	16103085	5	Het_Var	8	10	0.8	80	5+	70-80	Het_Var	20	33	0.606061	60.6061	Threshold2	Het_Var	Het_Var	16	19	0.842105	84.2105	concordant	HG2_PB_HySA_16594.jpeg	Hom_Var	5+	80-90	concordant	discordant	v0.6_Call	INS 8:16102806-16103085	INS	100-300	Het_Var
HG4_Ill_SVrefine2DISCOVARDovetail_3334	4	59	Insertion	34752794	34752853	22	Hom_Ref	9	11	0.818182	81.8182	5+	80-90	Hom_Ref	14	19	0.736842	73.6842	Threshold2	Hom_Ref	Hom_Ref	11	13	0.846154	84.6154	concordant	HG4_Ill_SVrefine2DISCOVARDovetail_3334.jpeg	omitted_region	5+	80-90	concordant	discordant	Omitted_Call	INS 4:34752794-34752853	INS	50-100	Hom_Ref
HG4_Ill_250bpfermikitraw_3481	2	64	Insertion	192901995	192902059	1018	Het_Var	3	4	0.75	75	2018-03-04	70-80	Het_Var	7	10	0.7	70	Threshold2	Het_Var	Het_Var	6	7	0.857143	85.7143	concordant	HG4_Ill_250bpfermikitraw_3481.jpeg	omitted_region	5+	80-90	concordant	discordant	Omitted_Call	INS 2:192901995-192902059	INS	50-100	Het_Var
HG3_Ill_250bpfermikitraw_20182	15	65	Insertion	93320897	93320962	580	Hom_Ref	3	4	0.75	75	2018-03-04	70-80	Hom_Ref	6	9	0.666667	66.6667	Threshold2	Hom_Ref	Hom_Ref	6	7	0.857143	85.7143	concordant	HG3_Ill_250bpfermikitraw_20182.jpeg	omitted_region	5+	80-90	concordant	discordant	Omitted_Call	INS 15:93320897-93320962	INS	50-100	Hom_Ref
HG4_Ill_GATKHC_5126	3	56	Insertion	22135889	22135945	643	Hom_Ref	4	4	1	100	2018-03-04	90-100	Hom_Ref	7	9	0.777778	77.7778	Threshold2	Hom_Ref	Hom_Ref	6	7	0.857143	85.7143	concordant	HG4_Ill_GATKHC_5126.jpeg	omitted_region	5+	80-90	concordant	discordant	Omitted_Call	INS 3:22135889-22135945	INS	50-100	Hom_Ref
HG2_PB_PB10Xdip_4014	10	59	Insertion	47038397	47038456	878	Hom_Ref	10	11	0.909091	90.9091	5+	90-100	Hom_Ref	12	14	0.857143	85.7143	Threshold2	Hom_Ref	Hom_Ref	12	14	0.857143	85.7143	concordant	HG2_PB_PB10Xdip_4014.jpeg	omitted_region	5+	80-90	concordant	discordant	Omitted_Call	INS 10:47038397-47038456	INS	50-100	Hom_Ref
HG4_PB_SVrefine2PBcRDovetail_4962	8	553	Insertion	142550993	142551546	166	Hom_Var	4	4	1	100	2018-03-04	90-100	Hom_Var	6	8	0.75	75	Threshold2	Hom_Var	Hom_Var	6	7	0.857143	85.7143	concordant	HG4_PB_SVrefine2PBcRDovetail_4962.jpeg	omitted_region	5+	80-90	concordant	discordant	Omitted_Call	INS 8:142550993-142551546	INS	400-1000	Hom_Var
HG2_PB_SVrefine2Falcon2Bionano_1262	2	562	Insertion	241466630	241467192	536	Hom_Var	3	4	0.75	75	2018-03-04	70-80	Hom_Var	6	9	0.666667	66.6667	Threshold2	Hom_Var	Hom_Var	6	7	0.857143	85.7143	concordant	HG2_PB_SVrefine2Falcon2Bionano_1262.jpeg	omitted_region	5+	80-90	concordant	discordant	Omitted_Call	INS 2:241466630-241467192	INS	400-1000	Hom_Var
HG2_PB_SVrefine2PBcRplusDovetail_10780	8	510	Insertion	1917578	1918088	711	Hom_Var	3	3	1	100	2018-03-04	90-100	Hom_Var	6	8	0.75	75	Threshold2	Hom_Var	Hom_Var	6	7	0.857143	85.7143	concordant	HG2_PB_SVrefine2PBcRplusDovetail_10780.jpeg	omitted_region	5+	80-90	concordant	discordant	Omitted_Call	INS 8:1917578-1918088	INS	400-1000	Hom_Var
HG2_PB_assemblyticsfalcon_14095	2	302	Insertion	138259798	138260100	886	Het_Var	6	6	1	100	5+	90-100	Het_Var	6	11	0.545455	54.5455	Threshold2	Het_Var	Het_Var	6	7	0.857143	85.7143	concordant	HG2_PB_assemblyticsfalcon_14095.jpeg	omitted_region	5+	80-90	concordant	discordant	Omitted_Call	INS 2:138259798-138260100	INS	300-400	Het_Var
HG4_Ill_scalpel_1098	1	20	Insertion	218839054	218839074	295	Het_Var	4	5	0.8	80	2018-03-04	70-80	Het_Var	6	7	0.857143	85.7143	Threshold2	Het_Var	Het_Var	6	7	0.857143	85.7143	concordant	HG4_Ill_scalpel_1098.jpeg	omitted_region	5+	80-90	concordant	discordant	Omitted_Call	INS 1:218839054-218839074	INS	20-50	Het_Var
HG3_Ill_Krunchall_19570	14	24	Insertion	44511471	44511495	1213	Hom_Ref	3	3	1	100	2018-03-04	90-100	Hom_Ref	6	8	0.75	75	Threshold2	Hom_Ref	Hom_Ref	6	7	0.857143	85.7143	concordant	HG3_Ill_Krunchall_19570.jpeg	omitted_region	5+	80-90	concordant	discordant	Omitted_Call	INS 14:44511471-44511495	INS	20-50	Hom_Ref
HG3_Ill_Cortex_2585	4	1977	Insertion	6035893	6037870	356	Hom_Ref	4	5	0.8	80	2018-03-04	70-80	Hom_Ref	7	8	0.875	87.5	Threshold2	Hom_Ref	Hom_Ref	6	7	0.857143	85.7143	concordant	HG3_Ill_Cortex_2585.jpeg	omitted_region	5+	80-90	concordant	discordant	Omitted_Call	INS 4:6035893-6037870	INS	1000-5999	Hom_Ref
HG2_PB_SVrefine2Falcon1plusDovetail_12338	9	6353	Insertion	42806340	42812693	1096	Hom_Ref	3	3	1	100	2018-03-04	90-100	Hom_Ref	7	9	0.777778	77.7778	Threshold2	Hom_Ref	Hom_Ref	7	8	0.875	87.5	concordant	HG2_PB_SVrefine2Falcon1plusDovetail_12338.jpeg	omitted_region	5+	80-90	concordant	discordant	Omitted_Call	INS 9:42806340-42812693	INS	6000+	Hom_Ref
HG3_Ill_Krunchall_21640	16	53	Insertion	89178457	89178510	424	Hom_Ref	6	7	0.857143	85.7143	5+	80-90	Hom_Ref	8	9	0.888889	88.8889	Threshold2	Hom_Ref	Hom_Ref	7	8	0.875	87.5	concordant	HG3_Ill_Krunchall_21640.jpeg	omitted_region	5+	80-90	concordant	discordant	Omitted_Call	INS 16:89178457-89178510	INS	50-100	Hom_Ref
HG2_PB_HySA_8916	4	20	Insertion	101489518	101489538	102	Hom_Var	5	5	1	100	5+	90-100	Hom_Var	7	8	0.875	87.5	Threshold2	Hom_Var	Hom_Var	7	8	0.875	87.5	concordant	HG2_PB_HySA_8916.jpeg	omitted_region	5+	80-90	concordant	discordant	Omitted_Call	INS 4:101489518-101489538	INS	20-50	Hom_Var
HG2_PB_assemblyticsfalcon_2189	10	1358	Insertion	447767	449125	1028	Another_Var	6	6	1	100	5+	90-100	Another_Var	8	11	0.727273	72.7273	Threshold2	Another_Var	Another_Var	7	8	0.875	87.5	concordant	HG2_PB_assemblyticsfalcon_2189.jpeg	omitted_region	5+	80-90	concordant	discordant	Omitted_Call	INS 10:447767-449125	INS	1000-5999	Another_Var
HG2_PB_SVrefine2PBcRplusDovetail_1588	11	202	Insertion	1070361	1070563	290	Hom_Var	5	5	1	100	5+	90-100	Hom_Var	8	9	0.888889	88.8889	Threshold2	Hom_Var	Hom_Var	7	8	0.875	87.5	concordant	HG2_PB_SVrefine2PBcRplusDovetail_1588.jpeg	omitted_region	5+	80-90	concordant	discordant	Omitted_Call	INS 11:1070361-1070563	INS	100-300	Hom_Var
HG3_Ill_MetaSV_3404	3	920	Insertion	66335923	66336843	415	Hom_Ref	4	5	0.8	80	2018-03-04	70-80	Hom_Ref	8	11	0.727273	72.7273	Threshold2	Hom_Ref	Hom_Ref	8	9	0.888889	88.8889	concordant	HG3_Ill_MetaSV_3404.jpeg	omitted_region	5+	80-90	concordant	discordant	Omitted_Call	INS 3:66335923-66336843	INS	400-1000	Hom_Ref
HG4_Ill_SVrefine2DISCOVARDovetail_3418	4	1430	Insertion	55036103	55037533	394	Hom_Var	5	6	0.833333	83.3333	5+	80-90	Hom_Var	8	9	0.888889	88.8889	Threshold2	Hom_Var	Hom_Var	8	9	0.888889	88.8889	concordant	HG4_Ill_SVrefine2DISCOVARDovetail_3418.jpeg	omitted_region	5+	80-90	concordant	discordant	Omitted_Call	INS 4:55036103-55037533	INS	1000-5999	Hom_Var
HG4_PB_assemblyticsfalcon_21708	5	228	Insertion	169598751	169598979	1172	Het_Var	6	7	0.857143	85.7143	5+	80-90	Het_Var	8	10	0.8	80	Threshold2	Het_Var	Het_Var	8	9	0.888889	88.8889	concordant	HG4_PB_assemblyticsfalcon_21708.jpeg	omitted_region	5+	80-90	concordant	discordant	Omitted_Call	INS 5:169598751-169598979	INS	100-300	Het_Var
HG2_Ill_SVrefine2DISCOVARplusDovetail_2132	11	7605	Insertion	56143091	56150696	276	Hom_Var	7	7	1	100	5+	90-100	Hom_Var	9	11	0.818182	81.8182	Threshold2	Hom_Var	Hom_Var	9	10	0.9	90	concordant	HG2_Ill_SVrefine2DISCOVARplusDovetail_2132.jpeg	omitted_region	5+	80-90	concordant	discordant	Omitted_Call	INS 11:56143091-56150696	INS	6000+	Hom_Var
HG2_Ill_SVrefine2DISCOVARplusDovetail_10810	5	46	Insertion	173236709	173236755	387	Hom_Ref	7	8	0.875	87.5	5+	80-90	Hom_Ref	10	12	0.833333	83.3333	Threshold2	Hom_Ref	Hom_Ref	9	10	0.9	90	concordant	HG2_Ill_SVrefine2DISCOVARplusDovetail_10810.jpeg	omitted_region	5+	80-90	concordant	discordant	Omitted_Call	INS 5:173236709-173236755	INS	20-50	Hom_Ref
HG3_Ill_SVrefine2DISCOVARDovetail_3413	4	73	Insertion	46654149	46654222	318	Hom_Ref	8	8	1	100	5+	90-100	Hom_Ref	10	11	0.909091	90.9091	Threshold2	Hom_Ref	Hom_Ref	10	11	0.909091	90.9091	concordant	HG3_Ill_SVrefine2DISCOVARDovetail_3413.jpeg	omitted_region	5+	90-100	concordant	discordant	Omitted_Call	INS 4:46654149-46654222	INS	50-100	Hom_Ref
HG4_PB_pbsv_2440	2	62	Insertion	167169499	167169561	250	Hom_Var	7	7	1	100	5+	90-100	Hom_Var	12	13	0.923077	92.3077	Threshold2	Hom_Var	Hom_Var	10	11	0.909091	90.9091	concordant	HG4_PB_pbsv_2440.jpeg	omitted_region	5+	90-100	concordant	discordant	Omitted_Call	INS 2:167169499-167169561	INS	50-100	Hom_Var
HG2_PB_PB10Xdip_2993	10	859	Insertion	12455573	12456432	96	Hom_Var	7	7	1	100	5+	90-100	Hom_Var	10	12	0.833333	83.3333	Threshold2	Hom_Var	Hom_Var	10	11	0.909091	90.9091	concordant	HG2_PB_PB10Xdip_2993.jpeg	omitted_region	5+	90-100	concordant	discordant	Omitted_Call	INS 10:12455573-12456432	INS	400-1000	Hom_Var
HG4_PB_HySA_2957	2	330	Insertion	77881880	77882210	1274	Het_Var	8	8	1	100	5+	90-100	Het_Var	11	12	0.916667	91.6667	Threshold2	Het_Var	Het_Var	10	11	0.909091	90.9091	concordant	HG4_PB_HySA_2957.jpeg	omitted_region	5+	90-100	concordant	discordant	Omitted_Call	INS 2:77881880-77882210	INS	300-400	Het_Var
HG4_PB_pbsv_7094	6	361	Insertion	91125864	91126225	188	Hom_Ref	9	9	1	100	5+	90-100	Hom_Ref	10	12	0.833333	83.3333	Threshold2	Hom_Ref	Hom_Ref	10	11	0.909091	90.9091	concordant	HG4_PB_pbsv_7094.jpeg	omitted_region	5+	90-100	concordant	discordant	Omitted_Call	INS 6:91125864-91126225	INS	300-400	Hom_Ref
HG3_Ill_GATKHC_14839	8	50	Insertion	15001279	15001329	194	Another_Var	8	8	1	100	5+	90-100	Another_Var	10	11	0.909091	90.9091	Threshold2	Another_Var	Another_Var	10	11	0.909091	90.9091	concordant	HG3_Ill_GATKHC_14839.jpeg	omitted_region	5+	90-100	concordant	discordant	Omitted_Call	INS 8:15001279-15001329	INS	20-50	Another_Var
HG2_CG_vcfBeta_433	1	21	Insertion	115893687	115893708	310	Hom_Ref	6	7	0.857143	85.7143	5+	80-90	Hom_Ref	11	12	0.916667	91.6667	Threshold2	Hom_Ref	Hom_Ref	10	11	0.909091	90.9091	concordant	HG2_CG_vcfBeta_433.jpeg	omitted_region	5+	90-100	concordant	discordant	Omitted_Call	INS 1:115893687-115893708	INS	20-50	Hom_Ref
HG3_PB_SVrefine2Falcon1Dovetail_1432	2	1569	Insertion	138674630	138676199	1052	Hom_Ref	7	8	0.875	87.5	5+	80-90	Hom_Ref	11	13	0.846154	84.6154	Threshold2	Hom_Ref	Hom_Ref	10	11	0.909091	90.9091	concordant	HG3_PB_SVrefine2Falcon1Dovetail_1432.jpeg	omitted_region	5+	90-100	concordant	discordant	Omitted_Call	INS 2:138674630-138676199	INS	1000-5999	Hom_Ref
HG3_Ill_SVrefine2DISCOVARDovetail_117	1	2688	Insertion	17615542	17618230	51	Hom_Var	7	7	1	100	5+	90-100	Hom_Var	11	12	0.916667	91.6667	Threshold2	Hom_Var	Hom_Var	10	11	0.909091	90.9091	concordant	HG3_Ill_SVrefine2DISCOVARDovetail_117.jpeg	omitted_region	5+	90-100	concordant	discordant	Omitted_Call	INS 1:17615542-17618230	INS	1000-5999	Hom_Var
HG4_PB_SVrefine2Falcon1Dovetail_5012	7	2417	Insertion	68226498	68228915	512	Hom_Var	8	8	1	100	5+	90-100	Hom_Var	10	12	0.833333	83.3333	Threshold2	Hom_Var	Hom_Var	10	11	0.909091	90.9091	concordant	HG4_PB_SVrefine2Falcon1Dovetail_5012.jpeg	omitted_region	5+	90-100	concordant	discordant	Omitted_Call	INS 7:68226498-68228915	INS	1000-5999	Hom_Var
HG3_Ill_GATKHCSBGrefine_8393	11	189	Insertion	106313950	106314139	670	Hom_Var	4	5	0.8	80	2018-03-04	70-80	Hom_Var	12	13	0.923077	92.3077	Threshold2	Hom_Var	Hom_Var	10	11	0.909091	90.9091	concordant	HG3_Ill_GATKHCSBGrefine_8393.jpeg	omitted_region	5+	90-100	concordant	discordant	Omitted_Call	INS 11:106313950-106314139	INS	100-300	Hom_Var
HG3_Ill_MetaSV_1797	15	795	Insertion	78892107	78892902	119	Hom_Var	9	9	1	100	5+	90-100	Hom_Var	11	12	0.916667	91.6667	Threshold2	Hom_Var	Hom_Var	11	12	0.916667	91.6667	concordant	HG3_Ill_MetaSV_1797.jpeg	omitted_region	5+	90-100	concordant	discordant	Omitted_Call	INS 15:78892107-78892902	INS	400-1000	Hom_Var
HG3_PB_pbsv_6997	6	319	Insertion	116307097	116307416	160	Hom_Ref	7	8	0.875	87.5	5+	80-90	Hom_Ref	11	13	0.846154	84.6154	Threshold2	Hom_Ref	Hom_Ref	11	12	0.916667	91.6667	concordant	HG3_PB_pbsv_6997.jpeg	omitted_region	5+	90-100	concordant	discordant	Omitted_Call	INS 6:116307097-116307416	INS	300-400	Hom_Ref
HG4_PB_assemblyticsfalcon_22776	6	26	Insertion	91428419	91428445	603	Het_Var	8	8	1	100	5+	90-100	Het_Var	12	14	0.857143	85.7143	Threshold2	Het_Var	Het_Var	11	12	0.916667	91.6667	concordant	HG4_PB_assemblyticsfalcon_22776.jpeg	omitted_region	5+	90-100	concordant	discordant	Omitted_Call	INS 6:91428419-91428445	INS	20-50	Het_Var
HG4_PB_HySA_23750	16	33	Insertion	86876060	86876093	1108	Hom_Ref	4	5	0.8	80	2018-03-04	70-80	Hom_Ref	13	14	0.928571	92.8571	Threshold2	Hom_Ref	Hom_Ref	11	12	0.916667	91.6667	concordant	HG4_PB_HySA_23750.jpeg	omitted_region	5+	90-100	concordant	discordant	Omitted_Call	INS 16:86876060-86876093	INS	20-50	Hom_Ref
HG4_CG_vcfBeta_2388	3	31	Insertion	112843845	112843876	1140	Hom_Ref	7	7	1	100	5+	90-100	Hom_Ref	11	12	0.916667	91.6667	Threshold2	Hom_Ref	Hom_Ref	11	12	0.916667	91.6667	concordant	HG4_CG_vcfBeta_2388.jpeg	omitted_region	5+	90-100	concordant	discordant	Omitted_Call	INS 3:112843845-112843876	INS	20-50	Hom_Ref
HG3_PB_pbsv_7595	7	133	Insertion	1927482	1927615	440	Hom_Ref	10	10	1	100	5+	90-100	Hom_Ref	12	14	0.857143	85.7143	Threshold2	Hom_Ref	Hom_Ref	12	13	0.923077	92.3077	concordant	HG3_PB_pbsv_7595.jpeg	omitted_region	5+	90-100	concordant	discordant	Omitted_Call	INS 7:1927482-1927615	INS	100-300	Hom_Ref
HG4_Ill_GATKHCSBGrefine_6754	8	88	Insertion	118368364	118368452	1153	Hom_Ref	10	10	1	100	5+	90-100	Hom_Ref	13	15	0.866667	86.6667	Threshold2	Hom_Ref	Hom_Ref	13	14	0.928571	92.8571	concordant	HG4_Ill_GATKHCSBGrefine_6754.jpeg	omitted_region	5+	90-100	concordant	discordant	Omitted_Call	INS 8:118368364-118368452	INS	50-100	Hom_Ref
HG3_PB_pbsv_4699	4	329	Insertion	115382201	115382530	40	Hom_Ref	13	14	0.928571	92.8571	5+	90-100	Hom_Ref	20	22	0.909091	90.9091	Threshold2	Hom_Ref	Hom_Ref	18	19	0.947368	94.7368	concordant	HG3_PB_pbsv_4699.jpeg	omitted_region	5+	90-100	concordant	discordant	Omitted_Call	INS 4:115382201-115382530	INS	300-400	Hom_Ref
HG3_PB_SVrefine2Falcon1Dovetail_4136	6	65193	Insertion	29954075	30019268	535	Hom_Ref	5	5	1	100	5+	90-100	Hom_Ref	9	9	1	100	Threshold2	Hom_Ref	Hom_Ref	8	8	1	100	concordant	HG3_PB_SVrefine2Falcon1Dovetail_4136.jpeg	omitted_region	5+	90-100	concordant	discordant	Omitted_Call	INS 6:29954075-30019268	INS	6000+	Hom_Ref
HG3_Ill_250bpfermikitraw_4106	3	90	Insertion	18821509	18821599	611	Het_Var	6	6	1	100	5+	90-100	Het_Var	11	12	0.916667	91.6667	Threshold2	Het_Var	Het_Var	10	10	1	100	concordant	HG3_Ill_250bpfermikitraw_4106.jpeg	omitted_region	5+	90-100	concordant	discordant	Omitted_Call	INS 3:18821509-18821599	INS	50-100	Het_Var
HG4_Ill_manta_1062	4	56	Insertion	28923893	28923949	27	Hom_Ref	14	14	1	100	5+	90-100	Hom_Ref	26	27	0.962963	96.2963	Threshold2	Hom_Ref	Hom_Ref	22	22	1	100	concordant	HG4_Ill_manta_1062.jpeg	omitted_region	5+	90-100	concordant	discordant	Omitted_Call	INS 4:28923893-28923949	INS	50-100	Hom_Ref
HG2_Ill_SVrefine2DISCOVARplusDovetail_10450	5	54	Insertion	88533722	88533776	343	Hom_Ref	7	7	1	100	5+	90-100	Hom_Ref	10	11	0.909091	90.9091	Threshold2	Hom_Ref	Hom_Ref	10	10	1	100	concordant	HG2_Ill_SVrefine2DISCOVARplusDovetail_10450.jpeg	omitted_region	5+	90-100	concordant	discordant	Omitted_Call	INS 5:88533722-88533776	INS	50-100	Hom_Ref
HG4_Ill_GATKHC_5193	3	84	Insertion	30227521	30227605	757	Hom_Ref	7	7	1	100	5+	90-100	Hom_Ref	11	11	1	100	Threshold2	Hom_Ref	Hom_Ref	11	11	1	100	concordant	HG4_Ill_GATKHC_5193.jpeg	omitted_region	5+	90-100	concordant	discordant	Omitted_Call	INS 3:30227521-30227605	INS	50-100	Hom_Ref
HG2_PB_PB10Xdip_448	1	57	Insertion	146510798	146510855	947	Hom_Ref	7	7	1	100	5+	90-100	Hom_Ref	12	13	0.923077	92.3077	Threshold2	Hom_Ref	Hom_Ref	11	11	1	100	concordant	HG2_PB_PB10Xdip_448.jpeg	omitted_region	5+	90-100	concordant	discordant	Omitted_Call	INS 1:146510798-146510855	INS	50-100	Hom_Ref
HG4_Ill_Krunchall_4595	3	59	Insertion	36258743	36258802	1131	Hom_Ref	8	8	1	100	5+	90-100	Hom_Ref	12	12	1	100	Threshold2	Hom_Ref	Hom_Ref	11	11	1	100	concordant	HG4_Ill_Krunchall_4595.jpeg	omitted_region	5+	90-100	concordant	discordant	Omitted_Call	INS 3:36258743-36258802	INS	50-100	Hom_Ref
HG2_PB_assemblyticsfalcon_27375	9	842	Insertion	2781609	2782451	1036	Hom_Var	4	4	1	100	2018-03-04	90-100	Hom_Var	6	6	1	100	Threshold2	Hom_Var	Hom_Var	6	6	1	100	concordant	HG2_PB_assemblyticsfalcon_27375.jpeg	omitted_region	5+	90-100	concordant	discordant	Omitted_Call	INS 9:2781609-2782451	INS	400-1000	Hom_Var
HG4_PB_pbsv_6322	5	343	Insertion	169035624	169035967	184	Het_Var	6	6	1	100	5+	90-100	Het_Var	6	7	0.857143	85.7143	Threshold2	Het_Var	Het_Var	6	6	1	100	concordant	HG4_PB_pbsv_6322.jpeg	omitted_region	5+	90-100	concordant	discordant	Omitted_Call	INS 5:169035624-169035967	INS	300-400	Het_Var
HG4_PB_HySA_10488	6	322	Insertion	93390217	93390539	305	Het_Var	9	9	1	100	5+	90-100	Het_Var	16	16	1	100	Threshold2	Het_Var	Het_Var	14	14	1	100	concordant	HG4_PB_HySA_10488.jpeg	omitted_region	5+	90-100	concordant	discordant	Omitted_Call	INS 6:93390217-93390539	INS	300-400	Het_Var
HG4_PB_SVrefine2PBcRDovetail_272	1	353	Insertion	54976289	54976642	552	Het_Var	6	6	1	100	5+	90-100	Het_Var	9	10	0.9	90	Threshold2	Het_Var	Het_Var	9	9	1	100	concordant	HG4_PB_SVrefine2PBcRDovetail_272.jpeg	omitted_region	5+	90-100	concordant	discordant	Omitted_Call	INS 1:54976289-54976642	INS	300-400	Het_Var
HG2_PB_SVrefine2Falcon1plusDovetail_10461	6	363	Insertion	125770556	125770919	848	Het_Var	6	6	1	100	5+	90-100	Het_Var	10	11	0.909091	90.9091	Threshold2	Het_Var	Het_Var	10	10	1	100	concordant	HG2_PB_SVrefine2Falcon1plusDovetail_10461.jpeg	omitted_region	5+	90-100	concordant	discordant	Omitted_Call	INS 6:125770556-125770919	INS	300-400	Het_Var
HG4_PB_assemblyticsfalcon_24829	7	317	Insertion	126870215	126870532	1166	Het_Var	7	7	1	100	5+	90-100	Het_Var	10	12	0.833333	83.3333	Threshold2	Het_Var	Het_Var	10	10	1	100	concordant	HG4_PB_assemblyticsfalcon_24829.jpeg	omitted_region	5+	90-100	concordant	discordant	Omitted_Call	INS 7:126870215-126870532	INS	300-400	Het_Var
HG3_PB_pbsv_10882	10	336	Insertion	25957327	25957663	238	Hom_Ref	9	9	1	100	5+	90-100	Hom_Ref	14	15	0.933333	93.3333	Threshold2	Hom_Ref	Hom_Ref	13	13	1	100	concordant	HG3_PB_pbsv_10882.jpeg	omitted_region	5+	90-100	concordant	discordant	Omitted_Call	INS 10:25957327-25957663	INS	300-400	Hom_Ref
HG4_Ill_GATKHCSBGrefine_6403	8	315	Insertion	19658929	19659244	730	Hom_Ref	7	7	1	100	5+	90-100	Hom_Ref	12	12	1	100	Threshold2	Hom_Ref	Hom_Ref	11	11	1	100	concordant	HG4_Ill_GATKHCSBGrefine_6403.jpeg	omitted_region	5+	90-100	concordant	discordant	Omitted_Call	INS 8:19658929-19659244	INS	300-400	Hom_Ref
HG3_Ill_SVrefine2DISCOVARDovetail_874	1	317	Insertion	227047568	227047885	1114	Hom_Ref	9	9	1	100	5+	90-100	Hom_Ref	11	11	1	100	Threshold2	Hom_Ref	Hom_Ref	11	11	1	100	concordant	HG3_Ill_SVrefine2DISCOVARDovetail_874.jpeg	omitted_region	5+	90-100	concordant	discordant	Omitted_Call	INS 1:227047568-227047885	INS	300-400	Hom_Ref
HG2_PB_HySA_15007	7	319	Insertion	63886482	63886801	1223	Hom_Ref	8	8	1	100	5+	90-100	Hom_Ref	11	12	0.916667	91.6667	Threshold2	Hom_Ref	Hom_Ref	10	10	1	100	concordant	HG2_PB_HySA_15007.jpeg	omitted_region	5+	90-100	concordant	discordant	Omitted_Call	INS 7:63886482-63886801	INS	300-400	Hom_Ref
HG2_Ill_SVrefine2DISCOVARplusDovetail_11214	6	319	Insertion	68314049	68314368	50	Hom_Var	4	4	1	100	2018-03-04	90-100	Hom_Var	10	11	0.909091	90.9091	Threshold2	Hom_Var	Hom_Var	9	9	1	100	concordant	HG2_Ill_SVrefine2DISCOVARplusDovetail_11214.jpeg	omitted_region	5+	90-100	concordant	discordant	Omitted_Call	INS 6:68314049-68314368	INS	300-400	Hom_Var
HG4_Ill_GATKHCSBGrefine_10087	14	307	Insertion	31444296	31444603	539	Hom_Var	8	8	1	100	5+	90-100	Hom_Var	12	13	0.923077	92.3077	Threshold2	Hom_Var	Hom_Var	12	12	1	100	concordant	HG4_Ill_GATKHCSBGrefine_10087.jpeg	omitted_region	5+	90-100	concordant	discordant	Omitted_Call	INS 14:31444296-31444603	INS	300-400	Hom_Var
HG3_Ill_MetaSV_4928	7	316	Insertion	76567212	76567528	698	Hom_Var	7	7	1	100	5+	90-100	Hom_Var	12	12	1	100	Threshold2	Hom_Var	Hom_Var	11	11	1	100	concordant	HG3_Ill_MetaSV_4928.jpeg	omitted_region	5+	90-100	concordant	discordant	Omitted_Call	INS 7:76567212-76567528	INS	300-400	Hom_Var
HG4_Ill_Krunchall_22639	17	30	Insertion	20658566	20658596	899	Het_Var	6	6	1	100	5+	90-100	Het_Var	9	10	0.9	90	Threshold2	Het_Var	Het_Var	9	9	1	100	concordant	HG4_Ill_Krunchall_22639.jpeg	omitted_region	5+	90-100	concordant	discordant	Omitted_Call	INS 17:20658566-20658596	INS	20-50	Het_Var
HG4_Ill_svaba_20465	17	20	Insertion	9351840	9351860	177	Hom_Ref	5	5	1	100	5+	90-100	Hom_Ref	9	9	1	100	Threshold2	Hom_Ref	Hom_Ref	8	8	1	100	concordant	HG4_Ill_svaba_20465.jpeg	omitted_region	5+	90-100	concordant	discordant	Omitted_Call	INS 17:9351840-9351860	INS	20-50	Hom_Ref
HG3_Ill_GATKHC_18727	10	35	Insertion	125664431	125664466	274	Hom_Ref	8	8	1	100	5+	90-100	Hom_Ref	11	12	0.916667	91.6667	Threshold2	Hom_Ref	Hom_Ref	11	11	1	100	concordant	HG3_Ill_GATKHC_18727.jpeg	omitted_region	5+	90-100	concordant	discordant	Omitted_Call	INS 10:125664431-125664466	INS	20-50	Hom_Ref
HG4_CG_vcfBeta_9376	14	25	Insertion	59560428	59560453	531	Hom_Ref	9	9	1	100	5+	90-100	Hom_Ref	14	16	0.875	87.5	Threshold2	Hom_Ref	Hom_Ref	13	13	1	100	concordant	HG4_CG_vcfBeta_9376.jpeg	omitted_region	5+	90-100	concordant	discordant	Omitted_Call	INS 14:59560428-59560453	INS	20-50	Hom_Ref
HG4_Ill_FB_13034	15	22	Insertion	31935342	31935364	542	Hom_Ref	7	7	1	100	5+	90-100	Hom_Ref	10	11	0.909091	90.9091	Threshold2	Hom_Ref	Hom_Ref	10	10	1	100	concordant	HG4_Ill_FB_13034.jpeg	omitted_region	5+	90-100	concordant	discordant	Omitted_Call	INS 15:31935342-31935364	INS	20-50	Hom_Ref
HG4_Ill_Cortex_3569	8	21	Insertion	641185	641206	551	Hom_Ref	6	6	1	100	5+	90-100	Hom_Ref	9	9	1	100	Threshold2	Hom_Ref	Hom_Ref	8	8	1	100	concordant	HG4_Ill_Cortex_3569.jpeg	omitted_region	5+	90-100	concordant	discordant	Omitted_Call	INS 8:641185-641206	INS	20-50	Hom_Ref
HG3_Ill_250bpfermikitraw_8989	6	24	Insertion	19304323	19304347	571	Hom_Ref	7	7	1	100	5+	90-100	Hom_Ref	14	14	1	100	Threshold2	Hom_Ref	Hom_Ref	13	13	1	100	concordant	HG3_Ill_250bpfermikitraw_8989.jpeg	omitted_region	5+	90-100	concordant	discordant	Omitted_Call	INS 6:19304323-19304347	INS	20-50	Hom_Ref
HG3_Ill_250bpfermikitraw_10503	7	50	Insertion	6951897	6951947	692	Hom_Ref	8	8	1	100	5+	90-100	Hom_Ref	12	13	0.923077	92.3077	Threshold2	Hom_Ref	Hom_Ref	12	12	1	100	concordant	HG3_Ill_250bpfermikitraw_10503.jpeg	omitted_region	5+	90-100	concordant	discordant	Omitted_Call	INS 7:6951897-6951947	INS	20-50	Hom_Ref
HG4_CG_vcfBeta_6722	9	23	Insertion	103695877	103695900	833	Hom_Ref	8	8	1	100	5+	90-100	Hom_Ref	13	14	0.928571	92.8571	Threshold2	Hom_Ref	Hom_Ref	13	13	1	100	concordant	HG4_CG_vcfBeta_6722.jpeg	omitted_region	5+	90-100	concordant	discordant	Omitted_Call	INS 9:103695877-103695900	INS	20-50	Hom_Ref
HG4_CG_vcfBeta_4103	5	24	Insertion	146343212	146343236	862	Hom_Ref	9	9	1	100	5+	90-100	Hom_Ref	14	14	1	100	Threshold2	Hom_Ref	Hom_Ref	14	14	1	100	concordant	HG4_CG_vcfBeta_4103.jpeg	omitted_region	5+	90-100	concordant	discordant	Omitted_Call	INS 5:146343212-146343236	INS	20-50	Hom_Ref
HG4_Ill_250bpfermikitraw_4532	3	50	Insertion	55662224	55662274	1087	Hom_Ref	5	5	1	100	5+	90-100	Hom_Ref	9	10	0.9	90	Threshold2	Hom_Ref	Hom_Ref	8	8	1	100	concordant	HG4_Ill_250bpfermikitraw_4532.jpeg	omitted_region	5+	90-100	concordant	discordant	Omitted_Call	INS 3:55662224-55662274	INS	20-50	Hom_Ref
HG4_Ill_FB_10600	11	22	Insertion	57771538	57771560	1198	Hom_Var	3	3	1	100	2018-03-04	90-100	Hom_Var	7	7	1	100	Threshold2	Hom_Var	Hom_Var	6	6	1	100	concordant	HG4_Ill_FB_10600.jpeg	omitted_region	5+	90-100	concordant	discordant	Omitted_Call	INS 11:57771538-57771560	INS	20-50	Hom_Var
HG4_PB_SVrefine2PBcRDovetail_1695	3	1094	Insertion	42388417	42389511	1016	Hom_Ref	8	8	1	100	5+	90-100	Hom_Ref	11	11	1	100	Threshold2	Hom_Ref	Hom_Ref	11	11	1	100	concordant	HG4_PB_SVrefine2PBcRDovetail_1695.jpeg	omitted_region	5+	90-100	concordant	discordant	Omitted_Call	INS 3:42388417-42389511	INS	1000-5999	Hom_Ref
HG2_Ill_SVrefine2DISCOVARplusDovetail_8657	3	1259	Insertion	87619841	87621100	147	Hom_Var	4	4	1	100	2018-03-04	90-100	Hom_Var	9	11	0.818182	81.8182	Threshold2	Hom_Var	Hom_Var	7	7	1	100	concordant	HG2_Ill_SVrefine2DISCOVARplusDovetail_8657.jpeg	omitted_region	5+	90-100	concordant	discordant	Omitted_Call	INS 3:87619841-87621100	INS	1000-5999	Hom_Var
HG4_PB_SVrefine2Falcon1Dovetail_6932	10	2055	Insertion	76579093	76581148	413	Hom_Var	7	7	1	100	5+	90-100	Hom_Var	15	15	1	100	Threshold2	Hom_Var	Hom_Var	13	13	1	100	concordant	HG4_PB_SVrefine2Falcon1Dovetail_6932.jpeg	omitted_region	5+	90-100	concordant	discordant	Omitted_Call	INS 10:76579093-76581148	INS	1000-5999	Hom_Var
HG2_PB_SVrefine2PB10Xhap12_4387	5	1249	Insertion	103926685	103927934	545	Hom_Var	6	6	1	100	5+	90-100	Hom_Var	11	12	0.916667	91.6667	Threshold2	Hom_Var	Hom_Var	10	10	1	100	concordant	HG2_PB_SVrefine2PB10Xhap12_4387.jpeg	omitted_region	5+	90-100	concordant	discordant	Omitted_Call	INS 5:103926685-103927934	INS	1000-5999	Hom_Var
HG2_PB_assemblyticsfalcon_26568	8	1562	Insertion	65461766	65463328	739	Hom_Var	9	9	1	100	5+	90-100	Hom_Var	15	16	0.9375	93.75	Threshold2	Hom_Var	Hom_Var	13	13	1	100	concordant	HG2_PB_assemblyticsfalcon_26568.jpeg	omitted_region	5+	90-100	concordant	discordant	Omitted_Call	INS 8:65461766-65463328	INS	1000-5999	Hom_Var
HG2_PB_SVrefine2Falcon1plusDovetail_11883	8	1193	Insertion	78255585	78256778	847	Hom_Var	3	3	1	100	2018-03-04	90-100	Hom_Var	5	5	1	100	Threshold2	Hom_Var	Hom_Var	4	4	1	100	concordant	HG2_PB_SVrefine2Falcon1plusDovetail_11883.jpeg	omitted_region	2018-03-04	90-100	concordant	discordant	Omitted_Call	INS 8:78255585-78256778	INS	1000-5999	Hom_Var
HG2_PB_pbsv_991	1	1018	Insertion	182107612	182108630	932	Hom_Var	4	4	1	100	2018-03-04	90-100	Hom_Var	10	11	0.909091	90.9091	Threshold2	Hom_Var	Hom_Var	8	8	1	100	concordant	HG2_PB_pbsv_991.jpeg	omitted_region	5+	90-100	concordant	discordant	Omitted_Call	INS 1:182107612-182108630	INS	1000-5999	Hom_Var
HG3_PB_SVrefine2Falcon1Dovetail_2608	4	298	Insertion	2082137	2082435	103	Het_Var	9	9	1	100	5+	90-100	Het_Var	13	14	0.928571	92.8571	Threshold2	Het_Var	Het_Var	13	13	1	100	concordant	HG3_PB_SVrefine2Falcon1Dovetail_2608.jpeg	omitted_region	5+	90-100	concordant	discordant	Omitted_Call	INS 4:2082137-2082435	INS	100-300	Het_Var
HG2_PB_assemblyticsfalcon_14839	2	276	Insertion	223882869	223883145	127	Het_Var	6	6	1	100	5+	90-100	Het_Var	9	10	0.9	90	Threshold2	Het_Var	Het_Var	9	9	1	100	concordant	HG2_PB_assemblyticsfalcon_14839.jpeg	omitted_region	5+	90-100	concordant	discordant	Omitted_Call	INS 2:223882869-223883145	INS	100-300	Het_Var
HG2_PB_assemblyticsfalcon_13937	2	291	Insertion	119540392	119540683	456	Het_Var	7	7	1	100	5+	90-100	Het_Var	12	13	0.923077	92.3077	Threshold2	Het_Var	Het_Var	11	11	1	100	concordant	HG2_PB_assemblyticsfalcon_13937.jpeg	omitted_region	5+	90-100	concordant	discordant	Omitted_Call	INS 2:119540392-119540683	INS	100-300	Het_Var
HG4_PB_SVrefine2Falcon1Dovetail_555	1	148	Insertion	157270162	157270310	717	Het_Var	9	9	1	100	5+	90-100	Het_Var	15	15	1	100	Threshold2	Het_Var	Het_Var	14	14	1	100	concordant	HG4_PB_SVrefine2Falcon1Dovetail_555.jpeg	omitted_region	5+	90-100	concordant	discordant	Omitted_Call	INS 1:157270162-157270310	INS	100-300	Het_Var
HG2_Ill_SVrefine2DISCOVARplusDovetail_9067	3	158	Insertion	183429967	183430125	749	Het_Var	6	6	1	100	5+	90-100	Het_Var	10	10	1	100	Threshold2	Het_Var	Het_Var	10	10	1	100	concordant	HG2_Ill_SVrefine2DISCOVARplusDovetail_9067.jpeg	omitted_region	5+	90-100	concordant	discordant	Omitted_Call	INS 3:183429967-183430125	INS	100-300	Het_Var
HG3_PB_HySA_21908	13	118	Insertion	114033368	114033486	805	Hom_Ref	9	9	1	100	5+	90-100	Hom_Ref	14	14	1	100	Threshold2	Hom_Ref	Hom_Ref	13	13	1	100	concordant	HG3_PB_HySA_21908.jpeg	omitted_region	5+	90-100	concordant	discordant	Omitted_Call	INS 13:114033368-114033486	INS	100-300	Hom_Ref
HG3_Ill_MetaSV_5060	7	296	Insertion	144343218	144343514	1029	Hom_Ref	8	8	1	100	5+	90-100	Hom_Ref	12	13	0.923077	92.3077	Threshold2	Hom_Ref	Hom_Ref	11	11	1	100	concordant	HG3_Ill_MetaSV_5060.jpeg	omitted_region	5+	90-100	concordant	discordant	Omitted_Call	INS 7:144343218-144343514	INS	100-300	Hom_Ref
HG2_Ill_SVrefine2DISCOVARplusDovetail_6505	2	118	Insertion	43830922	43831040	1193	Hom_Ref	9	9	1	100	5+	90-100	Hom_Ref	12	13	0.923077	92.3077	Threshold2	Hom_Ref	Hom_Ref	11	11	1	100	concordant	HG2_Ill_SVrefine2DISCOVARplusDovetail_6505.jpeg	omitted_region	5+	90-100	concordant	discordant	Omitted_Call	INS 2:43830922-43831040	INS	100-300	Hom_Ref
HG2_PB_SVrefine2PB10Xhap12_10939	14	7136	Insertion	104965176	104972312	918	Het_Var	6	6	1	100	5+	90-100	Het_Var	8	14	0.571429	57.1429	Threshold2	Het_Var	Het_Var	8	13	0.615385	61.5385	concordant	HG2_PB_SVrefine2PB10Xhap12_10939.jpeg	Het_Var	5+	60-70	concordant	concordant	v0.6_Call	INS 14:104965176-104972312	INS	6000+	Het_Var
HG4_Ill_FB_7787	7	24	Insertion	136098924	136098948	880	Hom_Var	4	8	0.5	50	2018-03-04	40-50	Hom_Var	8	14	0.571429	57.1429	Threshold2	Hom_Var	Hom_Var	8	13	0.615385	61.5385	concordant	HG4_Ill_FB_7787.jpeg	Hom_Var	5+	60-70	concordant	concordant	v0.6_Call	INS 7:136098924-136098948	INS	20-50	Hom_Var
HG2_Ill_150bpfermikitraw_16113	11	36	Insertion	134356294	134356330	1181	Het_Var	4	5	0.8	80	2018-03-04	70-80	Het_Var	6	11	0.545455	54.5455	Threshold2	Het_Var	Het_Var	5	8	0.625	62.5	concordant	HG2_Ill_150bpfermikitraw_16113.jpeg	Het_Var	5+	60-70	concordant	concordant	v0.6_Call	INS 11:134356294-134356330	INS	20-50	Het_Var
HG4_PB_pbsv_3063	3	233	Insertion	10266427	10266660	216	Hom_Var	4	5	0.8	80	2018-03-04	70-80	Hom_Var	7	11	0.636364	63.6364	Threshold2	Hom_Var	Hom_Var	5	8	0.625	62.5	concordant	HG4_PB_pbsv_3063.jpeg	Hom_Var	5+	60-70	concordant	concordant	v0.6_Call	INS 3:10266427-10266660	INS	100-300	Hom_Var
HG4_PB_pbsv_1347	1	104	Insertion	240941192	240941296	333	Hom_Var	5	5	1	100	5+	90-100	Hom_Var	5	9	0.555556	55.5556	Threshold2	Hom_Var	Hom_Var	5	8	0.625	62.5	concordant	HG4_PB_pbsv_1347.jpeg	Hom_Var	5+	60-70	concordant	concordant	v0.6_Call	INS 1:240941192-240941296	INS	100-300	Hom_Var
HG3_PB_SVrefine2Falcon1Dovetail_4264	6	10248	Insertion	82969645	82979893	139	Hom_Var	4	6	0.666667	66.6667	2018-03-04	60-70	Hom_Var	7	11	0.636364	63.6364	Threshold2	Hom_Var	Hom_Var	7	11	0.636364	63.6364	concordant	HG3_PB_SVrefine2Falcon1Dovetail_4264.jpeg	Hom_Var	5+	60-70	concordant	concordant	v0.6_Call	INS 6:82969645-82979893	INS	6000+	Hom_Var
HG2_Ill_manta_471	2	83	Insertion	24487544	24487627	846	Hom_Var	5	8	0.625	62.5	5+	60-70	Hom_Var	8	13	0.615385	61.5385	Threshold2	Hom_Var	Hom_Var	7	11	0.636364	63.6364	concordant	HG2_Ill_manta_471.jpeg	Hom_Var	5+	60-70	concordant	concordant	v0.6_Call	INS 2:24487544-24487627	INS	50-100	Hom_Var
HG2_Ill_GATKHC_26275	17	91	Insertion	10658945	10659036	973	Hom_Var	5	6	0.833333	83.3333	5+	80-90	Hom_Var	8	13	0.615385	61.5385	Threshold2	Hom_Var	Hom_Var	7	11	0.636364	63.6364	concordant	HG2_Ill_GATKHC_26275.jpeg	Hom_Var	5+	60-70	concordant	concordant	v0.6_Call	INS 17:10658945-10659036	INS	50-100	Hom_Var
HG2_PB_SVrefine2Falcon1plusDovetail_3886	15	319	Insertion	72639537	72639856	1216	Hom_Var	4	5	0.8	80	2018-03-04	70-80	Hom_Var	7	12	0.583333	58.3333	Threshold2	Hom_Var	Hom_Var	7	11	0.636364	63.6364	concordant	HG2_PB_SVrefine2Falcon1plusDovetail_3886.jpeg	Hom_Var	5+	60-70	concordant	concordant	v0.6_Call	INS 15:72639537-72639856	INS	300-400	Hom_Var
HG3_Ill_FB_10579	11	22	Insertion	44722251	44722273	970	Hom_Var	6	6	1	100	5+	90-100	Hom_Var	7	12	0.583333	58.3333	Threshold2	Hom_Var	Hom_Var	7	11	0.636364	63.6364	concordant	HG3_Ill_FB_10579.jpeg	Hom_Var	5+	60-70	concordant	concordant	v0.6_Call	INS 11:44722251-44722273	INS	20-50	Hom_Var
HG2_PB_pbsv_9455	8	1128	Insertion	56656867	56657995	450	Het_Var	4	6	0.666667	66.6667	2018-03-04	60-70	Het_Var	7	11	0.636364	63.6364	Threshold2	Het_Var	Het_Var	7	11	0.636364	63.6364	concordant	HG2_PB_pbsv_9455.jpeg	Het_Var	5+	60-70	concordant	concordant	v0.6_Call	INS 8:56656867-56657995	INS	1000-5999	Het_Var
HG2_PB_SVrefine2PB10Xhap12_6133	7	186	Insertion	99273267	99273453	131	Hom_Var	5	6	0.833333	83.3333	5+	80-90	Hom_Var	8	12	0.666667	66.6667	Threshold2	Hom_Var	Hom_Var	7	11	0.636364	63.6364	concordant	HG2_PB_SVrefine2PB10Xhap12_6133.jpeg	Hom_Var	5+	60-70	concordant	concordant	v0.6_Call	INS 7:99273267-99273453	INS	100-300	Hom_Var
HG4_PB_pbsv_15504	15	122	Insertion	86841504	86841626	540	Hom_Var	6	6	1	100	5+	90-100	Hom_Var	8	12	0.666667	66.6667	Threshold2	Hom_Var	Hom_Var	7	11	0.636364	63.6364	concordant	HG4_PB_pbsv_15504.jpeg	Hom_Var	5+	60-70	concordant	concordant	v0.6_Call	INS 15:86841504-86841626	INS	100-300	Hom_Var
HG2_PB_HySA_26180	13	6036	Insertion	99519873	99525909	338	Het_Var	4	6	0.666667	66.6667	2018-03-04	60-70	Het_Var	6	10	0.6	60	Threshold2	Het_Var	Het_Var	6	9	0.666667	66.6667	concordant	HG2_PB_HySA_26180.jpeg	Het_Var	5+	60-70	concordant	concordant	v0.6_Call	INS 13:99519873-99525909	INS	6000+	Het_Var
HG4_PB_SVrefine2PBcRDovetail_7316	14	6139	Insertion	31150808	31156947	699	Het_Var	3	3	1	100	2018-03-04	90-100	Het_Var	4	7	0.571429	57.1429	Threshold2	Het_Var	Het_Var	4	6	0.666667	66.6667	concordant	HG4_PB_SVrefine2PBcRDovetail_7316.jpeg	Het_Var	2018-03-04	60-70	concordant	concordant	v0.6_Call	INS 14:31150808-31156947	INS	6000+	Het_Var
HG2_Ill_SVrefine2DISCOVARplusDovetail_4071	14	7137	Insertion	104965176	104972313	822	Het_Var	5	5	1	100	5+	90-100	Het_Var	7	11	0.636364	63.6364	Threshold2	Het_Var	Het_Var	6	9	0.666667	66.6667	concordant	HG2_Ill_SVrefine2DISCOVARplusDovetail_4071.jpeg	Het_Var	5+	60-70	concordant	concordant	v0.6_Call	INS 14:104965176-104972313	INS	6000+	Het_Var
HG2_PB_HySA_25989	13	10130	Insertion	84919609	84929739	81	Hom_Var	3	3	1	100	2018-03-04	90-100	Hom_Var	4	6	0.666667	66.6667	Threshold2	Hom_Var	Hom_Var	4	6	0.666667	66.6667	concordant	HG2_PB_HySA_25989.jpeg	Hom_Var	2018-03-04	60-70	concordant	concordant	v0.6_Call	INS 13:84919609-84929739	INS	6000+	Hom_Var
HG2_PB_HySA_15530	7	6078	Insertion	107829249	107835327	299	Hom_Var	3	3	1	100	2018-03-04	90-100	Hom_Var	4	7	0.571429	57.1429	Threshold2	Hom_Var	Hom_Var	4	6	0.666667	66.6667	concordant	HG2_PB_HySA_15530.jpeg	Hom_Var	2018-03-04	60-70	concordant	concordant	v0.6_Call	INS 7:107829249-107835327	INS	6000+	Hom_Var
HG2_PB_SVrefine2Falcon2Bionano_4808	9	405	Insertion	26332940	26333345	960	Hom_Var	4	5	0.8	80	2018-03-04	70-80	Hom_Var	6	9	0.666667	66.6667	Threshold2	Hom_Var	Hom_Var	6	9	0.666667	66.6667	concordant	HG2_PB_SVrefine2Falcon2Bionano_4808.jpeg	Hom_Var	5+	60-70	concordant	concordant	v0.6_Call	INS 9:26332940-26333345	INS	400-1000	Hom_Var
HG3_Ill_svaba_3557	2	30	Insertion	229345047	229345077	410	Hom_Var	2	3	0.666667	66.6667	2018-01-02	60-70	Hom_Var	5	8	0.625	62.5	Threshold2	Hom_Var	Hom_Var	4	6	0.666667	66.6667	concordant	HG3_Ill_svaba_3557.jpeg	Hom_Var	2018-03-04	60-70	concordant	concordant	v0.6_Call	INS 2:229345047-229345077	INS	20-50	Hom_Var
HG2_PB_assemblyticsPBcR_13675	2	3346	Insertion	136591011	136594357	606	Hom_Var	3	4	0.75	75	2018-03-04	70-80	Hom_Var	4	7	0.571429	57.1429	Threshold2	Hom_Var	Hom_Var	4	6	0.666667	66.6667	concordant	HG2_PB_assemblyticsPBcR_13675.jpeg	Hom_Var	2018-03-04	60-70	concordant	concordant	v0.6_Call	INS 2:136591011-136594357	INS	1000-5999	Hom_Var
HG3_PB_pbsv_2772	2	1031	Insertion	235423485	235424516	667	Hom_Var	3	3	1	100	2018-03-04	90-100	Hom_Var	6	8	0.75	75	Threshold2	Hom_Var	Hom_Var	4	6	0.666667	66.6667	concordant	HG3_PB_pbsv_2772.jpeg	Hom_Var	2018-03-04	60-70	concordant	concordant	v0.6_Call	INS 2:235423485-235424516	INS	1000-5999	Hom_Var
HG4_PB_assemblyticsfalcon_421	1	2449	Insertion	31205194	31207643	1033	Hom_Var	2	2	1	100	2018-01-02	90-100	Hom_Var	4	7	0.571429	57.1429	Threshold2	Hom_Var	Hom_Var	4	6	0.666667	66.6667	concordant	HG4_PB_assemblyticsfalcon_421.jpeg	Hom_Var	2018-03-04	60-70	concordant	concordant	v0.6_Call	INS 1:31205194-31207643	INS	1000-5999	Hom_Var
HG2_PB_SVrefine2PB10Xhap12_8664	11	133	Insertion	1963338	1963471	1006	Hom_Var	5	6	0.833333	83.3333	5+	80-90	Hom_Var	6	10	0.6	60	Threshold2	Hom_Var	Hom_Var	6	9	0.666667	66.6667	concordant	HG2_PB_SVrefine2PB10Xhap12_8664.jpeg	Hom_Var	5+	60-70	concordant	concordant	v0.6_Call	INS 11:1963338-1963471	INS	100-300	Hom_Var
HG4_PB_HySA_250	1	6556	Insertion	9684038	9690594	491	Hom_Var	5	5	1	100	5+	90-100	Hom_Var	7	12	0.583333	58.3333	Threshold2	Hom_Var	Hom_Var	7	10	0.7	70	concordant	HG4_PB_HySA_250.jpeg	Hom_Var	5+	60-70	concordant	concordant	v0.6_Call	INS 1:9684038-9690594	INS	6000+	Hom_Var
HG2_PB_PB10Xdip_20025	3	6077	Insertion	151148543	151154620	1076	Hom_Var	3	4	0.75	75	2018-03-04	70-80	Hom_Var	8	12	0.666667	66.6667	Threshold2	Hom_Var	Hom_Var	7	10	0.7	70	concordant	HG2_PB_PB10Xdip_20025.jpeg	Hom_Var	5+	60-70	concordant	concordant	v0.6_Call	INS 3:151148543-151154620	INS	6000+	Hom_Var
HG3_PB_HySA_19088	11	56	Insertion	106202437	106202493	66	Het_Var	5	6	0.833333	83.3333	5+	80-90	Het_Var	7	10	0.7	70	Threshold2	Het_Var	Het_Var	7	10	0.7	70	concordant	HG3_PB_HySA_19088.jpeg	Het_Var	5+	60-70	concordant	concordant	v0.6_Call	INS 11:106202437-106202493	INS	50-100	Het_Var
HG3_Ill_scalpel_14498	14	21	Insertion	102190444	102190465	144	Het_Var	6	7	0.857143	85.7143	5+	80-90	Het_Var	7	11	0.636364	63.6364	Threshold2	Het_Var	Het_Var	7	10	0.7	70	concordant	HG3_Ill_scalpel_14498.jpeg	Het_Var	5+	60-70	concordant	concordant	v0.6_Call	INS 14:102190444-102190465	INS	20-50	Het_Var
HG3_PB_SVrefine2PBcRDovetail_6704	13	2550	Insertion	82367697	82370247	1015	Hom_Var	4	5	0.8	80	2018-03-04	70-80	Hom_Var	8	12	0.666667	66.6667	Threshold2	Hom_Var	Hom_Var	7	10	0.7	70	concordant	HG3_PB_SVrefine2PBcRDovetail_6704.jpeg	Hom_Var	5+	60-70	concordant	concordant	v0.6_Call	INS 13:82367697-82370247	INS	1000-5999	Hom_Var
HG3_PB_HySA_15709	9	6178	Insertion	91274538	91280716	568	Hom_Var	4	4	1	100	2018-03-04	90-100	Hom_Var	5	7	0.714286	71.4286	Threshold2	Hom_Var	Hom_Var	5	7	0.714286	71.4286	concordant	HG3_PB_HySA_15709.jpeg	Hom_Var	5+	70-80	concordant	concordant	v0.6_Call	INS 9:91274538-91280716	INS	6000+	Hom_Var
HG2_PB_HySA_18854	9	6059	Insertion	91274522	91280581	813	Hom_Var	3	3	1	100	2018-03-04	90-100	Hom_Var	5	7	0.714286	71.4286	Threshold2	Hom_Var	Hom_Var	5	7	0.714286	71.4286	concordant	HG2_PB_HySA_18854.jpeg	Hom_Var	5+	70-80	concordant	concordant	v0.6_Call	INS 9:91274522-91280581	INS	6000+	Hom_Var
HG4_PB_SVrefine2Falcon1Dovetail_7521	11	7591	Insertion	56143091	56150682	984	Hom_Var	2	3	0.666667	66.6667	2018-01-02	60-70	Hom_Var	6	8	0.75	75	Threshold2	Hom_Var	Hom_Var	5	7	0.714286	71.4286	concordant	HG4_PB_SVrefine2Falcon1Dovetail_7521.jpeg	Hom_Var	5+	70-80	concordant	concordant	v0.6_Call	INS 11:56143091-56150682	INS	6000+	Hom_Var
HG3_PB_HySA_5859	3	76	Insertion	157241464	157241540	1269	Hom_Var	5	5	1	100	5+	90-100	Hom_Var	6	8	0.75	75	Threshold2	Hom_Var	Hom_Var	5	7	0.714286	71.4286	concordant	HG3_PB_HySA_5859.jpeg	Hom_Var	5+	70-80	concordant	concordant	v0.6_Call	INS 3:157241464-157241540	INS	50-100	Hom_Var
HG2_Ill_GATKHCSBGrefine_8546	11	851	Insertion	126502581	126503432	1169	Hom_Var	3	4	0.75	75	2018-03-04	70-80	Hom_Var	6	10	0.6	60	Threshold2	Hom_Var	Hom_Var	5	7	0.714286	71.4286	concordant	HG2_Ill_GATKHCSBGrefine_8546.jpeg	Hom_Var	5+	70-80	concordant	concordant	v0.6_Call	INS 11:126502581-126503432	INS	400-1000	Hom_Var
HG2_PB_pbsv_15765	16	354	Insertion	594918	595272	428	Hom_Var	3	4	0.75	75	2018-03-04	70-80	Hom_Var	5	9	0.555556	55.5556	Threshold2	Hom_Var	Hom_Var	5	7	0.714286	71.4286	concordant	HG2_PB_pbsv_15765.jpeg	Hom_Var	5+	70-80	concordant	concordant	v0.6_Call	INS 16:594918-595272	INS	300-400	Hom_Var
HG3_PB_SVrefine2Falcon1Dovetail_4039	6	321	Insertion	1244504	1244825	455	Hom_Var	5	5	1	100	5+	90-100	Hom_Var	6	8	0.75	75	Threshold2	Hom_Var	Hom_Var	5	7	0.714286	71.4286	concordant	HG3_PB_SVrefine2Falcon1Dovetail_4039.jpeg	Hom_Var	5+	70-80	concordant	concordant	v0.6_Call	INS 6:1244504-1244825	INS	300-400	Hom_Var
HG4_Ill_GATKHC_7439	4	24	Insertion	42638173	42638197	1212	Hom_Var	4	5	0.8	80	2018-03-04	70-80	Hom_Var	6	9	0.666667	66.6667	Threshold2	Hom_Var	Hom_Var	5	7	0.714286	71.4286	concordant	HG4_Ill_GATKHC_7439.jpeg	Hom_Var	5+	70-80	concordant	concordant	v0.6_Call	INS 4:42638173-42638197	INS	20-50	Hom_Var
HG2_PB_SVrefine2PB10Xhap12_8779	11	5728	Insertion	25244524	25250252	31	Hom_Var	6	8	0.75	75	5+	70-80	Hom_Var	11	17	0.647059	64.7059	Threshold2	Hom_Var	Hom_Var	10	14	0.714286	71.4286	concordant	HG2_PB_SVrefine2PB10Xhap12_8779.jpeg	Hom_Var	5+	70-80	concordant	concordant	v0.6_Call	INS 11:25244524-25250252	INS	1000-5999	Hom_Var
HG2_PB_SVrefine2PBcRplusDovetail_10887	8	2276	Insertion	21624306	21626582	314	Hom_Var	3	3	1	100	2018-03-04	90-100	Hom_Var	5	8	0.625	62.5	Threshold2	Hom_Var	Hom_Var	5	7	0.714286	71.4286	concordant	HG2_PB_SVrefine2PBcRplusDovetail_10887.jpeg	Hom_Var	5+	70-80	concordant	concordant	v0.6_Call	INS 8:21624306-21626582	INS	1000-5999	Hom_Var
HG3_PB_SVrefine2Falcon1Dovetail_121	1	1428	Insertion	7580260	7581688	786	Hom_Var	5	5	1	100	5+	90-100	Hom_Var	6	8	0.75	75	Threshold2	Hom_Var	Hom_Var	5	7	0.714286	71.4286	concordant	HG3_PB_SVrefine2Falcon1Dovetail_121.jpeg	Hom_Var	5+	70-80	concordant	concordant	v0.6_Call	INS 1:7580260-7581688	INS	1000-5999	Hom_Var
HG2_10X_SVrefine210Xhap12_10566	15	6934	Insertion	29853207	29860141	174	Het_Var	6	7	0.857143	85.7143	5+	80-90	Het_Var	9	13	0.692308	69.2308	Threshold2	Het_Var	Het_Var	8	11	0.727273	72.7273	concordant	HG2_10X_SVrefine210Xhap12_10566.jpeg	Het_Var	5+	70-80	concordant	concordant	v0.6_Call	INS 15:29853207-29860141	INS	6000+	Het_Var
HG2_PB_SVrefine2Falcon1plusDovetail_195	1	7462	Insertion	23603556	23611018	773	Hom_Var	5	5	1	100	5+	90-100	Hom_Var	9	13	0.692308	69.2308	Threshold2	Hom_Var	Hom_Var	8	11	0.727273	72.7273	concordant	HG2_PB_SVrefine2Falcon1plusDovetail_195.jpeg	Hom_Var	5+	70-80	concordant	concordant	v0.6_Call	INS 1:23603556-23611018	INS	6000+	Hom_Var
HG2_PB_SVrefine2Falcon1plusDovetail_10298	6	612	Insertion	74273524	74274136	172	Het_Var	4	6	0.666667	66.6667	2018-03-04	60-70	Het_Var	8	14	0.571429	57.1429	Threshold2	Het_Var	Het_Var	8	11	0.727273	72.7273	concordant	HG2_PB_SVrefine2Falcon1plusDovetail_10298.jpeg	Het_Var	5+	70-80	concordant	concordant	v0.6_Call	INS 6:74273524-74274136	INS	400-1000	Het_Var
HG4_PB_SVrefine2PBcRDovetail_3551	6	2923	Insertion	107321670	107324593	1098	Het_Var	4	6	0.666667	66.6667	2018-03-04	60-70	Het_Var	8	12	0.666667	66.6667	Threshold2	Het_Var	Het_Var	8	11	0.727273	72.7273	concordant	HG4_PB_SVrefine2PBcRDovetail_3551.jpeg	Het_Var	5+	70-80	concordant	concordant	v0.6_Call	INS 6:107321670-107324593	INS	1000-5999	Het_Var
HG2_10X_SVrefine210Xhap12_2828	3	8740	Insertion	163104167	163112907	676	Het_Var	5	6	0.833333	83.3333	5+	80-90	Het_Var	6	9	0.666667	66.6667	Threshold2	Het_Var	Het_Var	6	8	0.75	75	concordant	HG2_10X_SVrefine210Xhap12_2828.jpeg	Het_Var	5+	70-80	concordant	concordant	v0.6_Call	INS 3:163104167-163112907	INS	6000+	Het_Var
HG3_PB_pbsv_9617	8	6025	Insertion	142425799	142431824	1014	Hom_Var	2	2	1	100	2018-01-02	90-100	Hom_Var	4	5	0.8	80	Threshold2	Hom_Var	Hom_Var	3	4	0.75	75	concordant	HG3_PB_pbsv_9617.jpeg	Hom_Var	2018-03-04	70-80	concordant	concordant	v0.6_Call	INS 8:142425799-142431824	INS	6000+	Hom_Var
HG3_Ill_Spiral_2765	2	54	Insertion	193963036	193963090	179	Hom_Var	2	2	1	100	2018-01-02	90-100	Hom_Var	3	5	0.6	60	Threshold2	Hom_Var	Hom_Var	3	4	0.75	75	concordant	HG3_Ill_Spiral_2765.jpeg	Hom_Var	2018-03-04	70-80	concordant	concordant	v0.6_Call	INS 2:193963036-193963090	INS	50-100	Hom_Var
HG4_PB_SVrefine2Falcon1Dovetail_7299	11	722	Insertion	1707847	1708569	939	Het_Var	2	2	1	100	2018-01-02	90-100	Het_Var	3	4	0.75	75	Threshold2	Het_Var	Het_Var	3	4	0.75	75	concordant	HG4_PB_SVrefine2Falcon1Dovetail_7299.jpeg	Het_Var	2018-03-04	70-80	concordant	concordant	v0.6_Call	INS 11:1707847-1708569	INS	400-1000	Het_Var
HG4_Ill_GATKHCSBGrefine_647	1	459	Insertion	175619853	175620312	500	Hom_Var	5	6	0.833333	83.3333	5+	80-90	Hom_Var	7	10	0.7	70	Threshold2	Hom_Var	Hom_Var	6	8	0.75	75	concordant	HG4_Ill_GATKHCSBGrefine_647.jpeg	Hom_Var	5+	70-80	concordant	concordant	v0.6_Call	INS 1:175619853-175620312	INS	400-1000	Hom_Var
HG2_PB_assemblyticsfalcon_19354	4	323	Insertion	43399974	43400297	1073	Hom_Var	6	7	0.857143	85.7143	5+	80-90	Hom_Var	10	14	0.714286	71.4286	Threshold2	Hom_Var	Hom_Var	9	12	0.75	75	concordant	HG2_PB_assemblyticsfalcon_19354.jpeg	Hom_Var	5+	70-80	concordant	concordant	v0.6_Call	INS 4:43399974-43400297	INS	300-400	Hom_Var
HG4_Ill_Cortex_3625	8	20	Insertion	33744679	33744699	69	Het_Var	7	9	0.777778	77.7778	5+	70-80	Het_Var	10	13	0.769231	76.9231	Threshold2	Het_Var	Het_Var	9	12	0.75	75	concordant	HG4_Ill_Cortex_3625.jpeg	Het_Var	5+	70-80	concordant	concordant	v0.6_Call	INS 8:33744679-33744699	INS	20-50	Het_Var
HG2_PB_assemblyticsPBcR_14320	2	22	Insertion	212464238	212464260	479	Hom_Var	4	5	0.8	80	2018-03-04	70-80	Hom_Var	7	11	0.636364	63.6364	Threshold2	Hom_Var	Hom_Var	6	8	0.75	75	concordant	HG2_PB_assemblyticsPBcR_14320.jpeg	Hom_Var	5+	70-80	concordant	concordant	v0.6_Call	INS 2:212464238-212464260	INS	20-50	Hom_Var
HG3_PB_HySA_1178	1	2137	Insertion	116979594	116981731	374	Hom_Var	4	4	1	100	2018-03-04	90-100	Hom_Var	6	8	0.75	75	Threshold2	Hom_Var	Hom_Var	6	8	0.75	75	concordant	HG3_PB_HySA_1178.jpeg	Hom_Var	5+	70-80	concordant	concordant	v0.6_Call	INS 1:116979594-116981731	INS	1000-5999	Hom_Var
HG3_PB_SVrefine2PBcRDovetail_4969	9	8533	Insertion	136182788	136191321	803	Hom_Var	8	8	1	100	5+	90-100	Hom_Var	10	14	0.714286	71.4286	Threshold2	Hom_Var	Hom_Var	10	13	0.769231	76.9231	concordant	HG3_PB_SVrefine2PBcRDovetail_4969.jpeg	Hom_Var	5+	70-80	concordant	concordant	v0.6_Call	INS 9:136182788-136191321	INS	6000+	Hom_Var
HG2_10X_SVrefine210Xhap12_2693	3	7042	Insertion	127859142	127866184	559	Het_Var	4	4	1	100	2018-03-04	90-100	Het_Var	7	11	0.636364	63.6364	Threshold2	Het_Var	Het_Var	7	9	0.777778	77.7778	concordant	HG2_10X_SVrefine210Xhap12_2693.jpeg	Het_Var	5+	70-80	concordant	concordant	v0.6_Call	INS 3:127859142-127866184	INS	6000+	Het_Var
HG3_PB_SVrefine2Falcon1Dovetail_2674	4	6052	Insertion	10632678	10638730	1168	Het_Var	4	4	1	100	2018-03-04	90-100	Het_Var	7	10	0.7	70	Threshold2	Het_Var	Het_Var	7	9	0.777778	77.7778	concordant	HG3_PB_SVrefine2Falcon1Dovetail_2674.jpeg	Het_Var	5+	70-80	concordant	concordant	v0.6_Call	INS 4:10632678-10638730	INS	6000+	Het_Var
HG4_PB_pbsv_14964	14	57	Insertion	92302932	92302989	1124	Het_Var	5	6	0.833333	83.3333	5+	80-90	Het_Var	7	11	0.636364	63.6364	Threshold2	Het_Var	Het_Var	7	9	0.777778	77.7778	concordant	HG4_PB_pbsv_14964.jpeg	Het_Var	5+	70-80	concordant	concordant	v0.6_Call	INS 14:92302932-92302989	INS	50-100	Het_Var
HG4_Ill_manta_443	2	73	Insertion	47119859	47119932	322	Hom_Var	5	6	0.833333	83.3333	5+	80-90	Hom_Var	7	9	0.777778	77.7778	Threshold2	Hom_Var	Hom_Var	7	9	0.777778	77.7778	concordant	HG4_Ill_manta_443.jpeg	Hom_Var	5+	70-80	concordant	concordant	v0.6_Call	INS 2:47119859-47119932	INS	50-100	Hom_Var
HG2_Ill_manta_2818	8	56	Insertion	134655214	134655270	1230	Hom_Var	6	6	1	100	5+	90-100	Hom_Var	8	10	0.8	80	Threshold2	Hom_Var	Hom_Var	7	9	0.777778	77.7778	concordant	HG2_Ill_manta_2818.jpeg	Hom_Var	5+	70-80	concordant	concordant	v0.6_Call	INS 8:134655214-134655270	INS	50-100	Hom_Var
HG4_PB_SVrefine2Falcon1Dovetail_1110	2	818	Insertion	25408714	25409532	989	Hom_Var	6	6	1	100	5+	90-100	Hom_Var	8	12	0.666667	66.6667	Threshold2	Hom_Var	Hom_Var	7	9	0.777778	77.7778	concordant	HG4_PB_SVrefine2Falcon1Dovetail_1110.jpeg	Hom_Var	5+	70-80	concordant	concordant	v0.6_Call	INS 2:25408714-25409532	INS	400-1000	Hom_Var
HG3_PB_SVrefine2PBcRDovetail_1584	3	318	Insertion	46881771	46882089	1095	Hom_Var	6	7	0.857143	85.7143	5+	80-90	Hom_Var	7	10	0.7	70	Threshold2	Hom_Var	Hom_Var	7	9	0.777778	77.7778	concordant	HG3_PB_SVrefine2PBcRDovetail_1584.jpeg	Hom_Var	5+	70-80	concordant	concordant	v0.6_Call	INS 3:46881771-46882089	INS	300-400	Hom_Var
HG4_Ill_FB_9286	9	34	Insertion	121356013	121356047	251	Het_Var	5	6	0.833333	83.3333	5+	80-90	Het_Var	8	12	0.666667	66.6667	Threshold2	Het_Var	Het_Var	7	9	0.777778	77.7778	concordant	HG4_Ill_FB_9286.jpeg	Het_Var	5+	70-80	concordant	concordant	v0.6_Call	INS 9:121356013-121356047	INS	20-50	Het_Var
HG2_Ill_Krunchall_490	1	20	Insertion	61491017	61491037	713	Het_Var	5	7	0.714286	71.4286	5+	70-80	Het_Var	8	11	0.727273	72.7273	Threshold2	Het_Var	Het_Var	7	9	0.777778	77.7778	concordant	HG2_Ill_Krunchall_490.jpeg	Het_Var	5+	70-80	concordant	concordant	v0.6_Call	INS 1:61491017-61491037	INS	20-50	Het_Var
HG2_PB_SVrefine2Falcon1plusDovetail_8324	3	2476	Insertion	174479954	174482430	734	Het_Var	4	4	1	100	2018-03-04	90-100	Het_Var	7	10	0.7	70	Threshold2	Het_Var	Het_Var	7	9	0.777778	77.7778	concordant	HG2_PB_SVrefine2Falcon1plusDovetail_8324.jpeg	Het_Var	5+	70-80	concordant	concordant	v0.6_Call	INS 3:174479954-174482430	INS	1000-5999	Het_Var
HG4_PB_SVrefine2Falcon1Dovetail_214	1	1174	Insertion	27433596	27434770	584	Hom_Var	5	5	1	100	5+	90-100	Hom_Var	8	12	0.666667	66.6667	Threshold2	Hom_Var	Hom_Var	7	9	0.777778	77.7778	concordant	HG4_PB_SVrefine2Falcon1Dovetail_214.jpeg	Hom_Var	5+	70-80	concordant	concordant	v0.6_Call	INS 1:27433596-27434770	INS	1000-5999	Hom_Var
HG2_PB_SVrefine2Falcon1plusDovetail_8228	3	6080	Insertion	143121758	143127838	245	Het_Var	6	6	1	100	5+	90-100	Het_Var	8	12	0.666667	66.6667	Threshold2	Het_Var	Het_Var	8	10	0.8	80	concordant	HG2_PB_SVrefine2Falcon1plusDovetail_8228.jpeg	Het_Var	5+	70-80	concordant	concordant	v0.6_Call	INS 3:143121758-143127838	INS	6000+	Het_Var
HG2_PB_HySA_331	1	6500	Insertion	9684034	9690534	780	Hom_Var	4	5	0.8	80	2018-03-04	70-80	Hom_Var	9	13	0.692308	69.2308	Threshold2	Hom_Var	Hom_Var	8	10	0.8	80	concordant	HG2_PB_HySA_331.jpeg	Hom_Var	5+	70-80	concordant	concordant	v0.6_Call	INS 1:9684034-9690534	INS	6000+	Hom_Var
HG2_PB_pbsv_6058	5	765	Insertion	108266043	108266808	553	Hom_Var	5	5	1	100	5+	90-100	Hom_Var	10	12	0.833333	83.3333	Threshold2	Hom_Var	Hom_Var	8	10	0.8	80	concordant	HG2_PB_pbsv_6058.jpeg	Hom_Var	5+	70-80	concordant	concordant	v0.6_Call	INS 5:108266043-108266808	INS	400-1000	Hom_Var
HG3_PB_HySA_22099	14	42	Insertion	26068825	26068867	29	Het_Var	12	13	0.923077	92.3077	5+	90-100	Het_Var	20	25	0.8	80	Threshold2	Het_Var	Het_Var	16	20	0.8	80	concordant	HG3_PB_HySA_22099.jpeg	Het_Var	5+	70-80	concordant	concordant	v0.6_Call	INS 14:26068825-26068867	INS	20-50	Het_Var
HG2_Ill_breakscan11_3655	6	2535	Insertion	2920156	2922691	1105	Het_Var	5	6	0.833333	83.3333	5+	80-90	Het_Var	8	12	0.666667	66.6667	Threshold2	Het_Var	Het_Var	8	10	0.8	80	concordant	HG2_Ill_breakscan11_3655.jpeg	Het_Var	5+	70-80	concordant	concordant	v0.6_Call	INS 6:2920156-2922691	INS	1000-5999	Het_Var
HG2_PB_pbsv_3268	3	1109	Insertion	51630109	51631218	215	Hom_Var	5	6	0.833333	83.3333	5+	80-90	Hom_Var	9	11	0.818182	81.8182	Threshold2	Hom_Var	Hom_Var	8	10	0.8	80	concordant	HG2_PB_pbsv_3268.jpeg	Hom_Var	5+	70-80	concordant	concordant	v0.6_Call	INS 3:51630109-51631218	INS	1000-5999	Hom_Var
HG2_PB_pbsv_7278	6	4264	Insertion	128326850	128331114	469	Hom_Var	6	6	1	100	5+	90-100	Hom_Var	8	10	0.8	80	Threshold2	Hom_Var	Hom_Var	8	10	0.8	80	concordant	HG2_PB_pbsv_7278.jpeg	Hom_Var	5+	70-80	concordant	concordant	v0.6_Call	INS 6:128326850-128331114	INS	1000-5999	Hom_Var
HG4_PB_SVrefine2Falcon1Dovetail_6195	9	4826	Insertion	9008027	9012853	526	Hom_Var	5	5	1	100	5+	90-100	Hom_Var	9	12	0.75	75	Threshold2	Hom_Var	Hom_Var	8	10	0.8	80	concordant	HG4_PB_SVrefine2Falcon1Dovetail_6195.jpeg	Hom_Var	5+	70-80	concordant	concordant	v0.6_Call	INS 9:9008027-9012853	INS	1000-5999	Hom_Var
HG2_10X_SVrefine210Xhap12_8599	11	4536	Insertion	47659832	47664368	1039	Hom_Var	6	6	1	100	5+	90-100	Hom_Var	9	11	0.818182	81.8182	Threshold2	Hom_Var	Hom_Var	8	10	0.8	80	concordant	HG2_10X_SVrefine210Xhap12_8599.jpeg	Hom_Var	5+	70-80	concordant	concordant	v0.6_Call	INS 11:47659832-47664368	INS	1000-5999	Hom_Var
HG2_PB_SVrefine2PB10Xhap12_6226	7	95	Insertion	121162566	121162661	481	Het_Var	9	9	1	100	5+	90-100	Het_Var	14	18	0.777778	77.7778	Threshold2	Het_Var	Het_Var	13	16	0.8125	81.25	concordant	HG2_PB_SVrefine2PB10Xhap12_6226.jpeg	Het_Var	5+	80-90	concordant	concordant	v0.6_Call	INS 7:121162566-121162661	INS	50-100	Het_Var
HG4_Ill_GATKHC_2341	2	79	Insertion	1146935	1147014	9	Hom_Var	9	11	0.818182	81.8182	5+	80-90	Hom_Var	20	27	0.740741	74.0741	Threshold2	Hom_Var	Hom_Var	13	16	0.8125	81.25	concordant	HG4_Ill_GATKHC_2341.jpeg	Hom_Var	5+	80-90	concordant	concordant	v0.6_Call	INS 2:1146935-1147014	INS	50-100	Hom_Var
HG4_Ill_SVrefine2DISCOVARDovetail_10764	15	800	Insertion	34186760	34187560	13	Hom_Var	14	15	0.933333	93.3333	5+	90-100	Hom_Var	21	30	0.7	70	Threshold2	Hom_Var	Hom_Var	18	22	0.818182	81.8182	concordant	HG4_Ill_SVrefine2DISCOVARDovetail_10764.jpeg	Hom_Var	5+	80-90	concordant	concordant	v0.6_Call	INS 15:34186760-34187560	INS	400-1000	Hom_Var
HG2_PB_SVrefine2PB10Xhap12_10740	14	322	Insertion	60532084	60532406	261	Hom_Var	8	8	1	100	5+	90-100	Hom_Var	9	12	0.75	75	Threshold2	Hom_Var	Hom_Var	9	11	0.818182	81.8182	concordant	HG2_PB_SVrefine2PB10Xhap12_10740.jpeg	Hom_Var	5+	80-90	concordant	concordant	v0.6_Call	INS 14:60532084-60532406	INS	300-400	Hom_Var
HG2_PB_HySA_20196	10	319	Insertion	29105290	29105609	569	Hom_Var	6	6	1	100	5+	90-100	Hom_Var	9	12	0.75	75	Threshold2	Hom_Var	Hom_Var	9	11	0.818182	81.8182	concordant	HG2_PB_HySA_20196.jpeg	Hom_Var	5+	80-90	concordant	concordant	v0.6_Call	INS 10:29105290-29105609	INS	300-400	Hom_Var
HG2_Ill_SpiralSDKrefine_8241	2	22	Insertion	16858594	16858616	915	Het_Var	5	6	0.833333	83.3333	5+	80-90	Het_Var	10	13	0.769231	76.9231	Threshold2	Het_Var	Het_Var	9	11	0.818182	81.8182	concordant	HG2_Ill_SpiralSDKrefine_8241.jpeg	Het_Var	5+	80-90	concordant	concordant	v0.6_Call	INS 2:16858594-16858616	INS	20-50	Het_Var
HG3_Ill_scalpel_6523	6	25	Insertion	6939383	6939408	741	Hom_Var	4	6	0.666667	66.6667	2018-03-04	60-70	Hom_Var	10	12	0.833333	83.3333	Threshold2	Hom_Var	Hom_Var	9	11	0.818182	81.8182	concordant	HG3_Ill_scalpel_6523.jpeg	Hom_Var	5+	80-90	concordant	concordant	v0.6_Call	INS 6:6939383-6939408	INS	20-50	Hom_Var
HG2_Ill_GATKHC_19838	11	38	Insertion	63803185	63803223	827	Hom_Var	5	5	1	100	5+	90-100	Hom_Var	10	13	0.769231	76.9231	Threshold2	Hom_Var	Hom_Var	9	11	0.818182	81.8182	concordant	HG2_Ill_GATKHC_19838.jpeg	Hom_Var	5+	80-90	concordant	concordant	v0.6_Call	INS 11:63803185-63803223	INS	20-50	Hom_Var
HG3_Ill_Krunchall_5557	3	20	Insertion	188375910	188375930	1236	Hom_Var	8	8	1	100	5+	90-100	Hom_Var	9	13	0.692308	69.2308	Threshold2	Hom_Var	Hom_Var	9	11	0.818182	81.8182	concordant	HG3_Ill_Krunchall_5557.jpeg	Hom_Var	5+	80-90	concordant	concordant	v0.6_Call	INS 3:188375910-188375930	INS	20-50	Hom_Var
HG3_Ill_GATKHCSBGrefine_7169	9	117	Insertion	132621534	132621651	477	Hom_Var	6	7	0.857143	85.7143	5+	80-90	Hom_Var	9	12	0.75	75	Threshold2	Hom_Var	Hom_Var	9	11	0.818182	81.8182	concordant	HG3_Ill_GATKHCSBGrefine_7169.jpeg	Hom_Var	5+	80-90	concordant	concordant	v0.6_Call	INS 9:132621534-132621651	INS	100-300	Hom_Var
HG4_Ill_SVrefine2DISCOVARDovetail_7431	9	200	Insertion	74644834	74645034	930	Hom_Var	7	7	1	100	5+	90-100	Hom_Var	11	14	0.785714	78.5714	Threshold2	Hom_Var	Hom_Var	9	11	0.818182	81.8182	concordant	HG4_Ill_SVrefine2DISCOVARDovetail_7431.jpeg	Hom_Var	5+	80-90	concordant	concordant	v0.6_Call	INS 9:74644834-74645034	INS	100-300	Hom_Var
HG2_PB_SVrefine2Falcon1plusDovetail_8596	4	6066	Insertion	10632678	10638744	404	Het_Var	6	6	1	100	5+	90-100	Het_Var	10	14	0.714286	71.4286	Threshold2	Het_Var	Het_Var	10	12	0.833333	83.3333	concordant	HG2_PB_SVrefine2Falcon1plusDovetail_8596.jpeg	Het_Var	5+	80-90	concordant	concordant	v0.6_Call	INS 4:10632678-10638744	INS	6000+	Het_Var
HG2_Ill_SVrefine2DISCOVARplusDovetail_13690	9	9561	Insertion	104121211	104130772	719	Het_Var	3	3	1	100	2018-03-04	90-100	Het_Var	5	8	0.625	62.5	Threshold2	Het_Var	Het_Var	5	6	0.833333	83.3333	concordant	HG2_Ill_SVrefine2DISCOVARplusDovetail_13690.jpeg	Het_Var	5+	80-90	concordant	concordant	v0.6_Call	INS 9:104121211-104130772	INS	6000+	Het_Var
HG2_PB_HySA_12194	6	100	Insertion	8761440	8761540	41	Hom_Var	14	16	0.875	87.5	5+	80-90	Hom_Var	22	26	0.846154	84.6154	Threshold2	Hom_Var	Hom_Var	20	24	0.833333	83.3333	concordant	HG2_PB_HySA_12194.jpeg	Hom_Var	5+	80-90	concordant	concordant	v0.6_Call	INS 6:8761440-8761540	INS	50-100	Hom_Var
HG2_PB_SVrefine2Falcon2Bionano_5484	10	495	Insertion	77093484	77093979	368	Hom_Var	3	3	1	100	2018-03-04	90-100	Hom_Var	5	6	0.833333	83.3333	Threshold2	Hom_Var	Hom_Var	5	6	0.833333	83.3333	concordant	HG2_PB_SVrefine2Falcon2Bionano_5484.jpeg	Hom_Var	5+	80-90	concordant	concordant	v0.6_Call	INS 10:77093484-77093979	INS	400-1000	Hom_Var
HG4_PB_SVrefine2PBcRDovetail_5101	9	495	Insertion	34681480	34681975	869	Hom_Var	7	7	1	100	5+	90-100	Hom_Var	10	13	0.769231	76.9231	Threshold2	Hom_Var	Hom_Var	10	12	0.833333	83.3333	concordant	HG4_PB_SVrefine2PBcRDovetail_5101.jpeg	Hom_Var	5+	80-90	concordant	concordant	v0.6_Call	INS 9:34681480-34681975	INS	400-1000	Hom_Var
HG3_Ill_SVrefine2DISCOVARDovetail_6432	7	764	Insertion	128438315	128439079	1132	Hom_Var	7	9	0.777778	77.7778	5+	70-80	Hom_Var	11	13	0.846154	84.6154	Threshold2	Hom_Var	Hom_Var	10	12	0.833333	83.3333	concordant	HG3_Ill_SVrefine2DISCOVARDovetail_6432.jpeg	Hom_Var	5+	80-90	concordant	concordant	v0.6_Call	INS 7:128438315-128439079	INS	400-1000	Hom_Var
HG3_PB_SVrefine2Falcon1Dovetail_374	1	329	Insertion	77476395	77476724	317	Het_Var	3	3	1	100	2018-03-04	90-100	Het_Var	5	8	0.625	62.5	Threshold2	Het_Var	Het_Var	5	6	0.833333	83.3333	concordant	HG3_PB_SVrefine2Falcon1Dovetail_374.jpeg	Het_Var	5+	80-90	concordant	concordant	v0.6_Call	INS 1:77476395-77476724	INS	300-400	Het_Var
HG2_PB_SVrefine2PBcRplusDovetail_120	1	328	Insertion	8404900	8405228	1139	Hom_Var	4	4	1	100	2018-03-04	90-100	Hom_Var	5	8	0.625	62.5	Threshold2	Hom_Var	Hom_Var	5	6	0.833333	83.3333	concordant	HG2_PB_SVrefine2PBcRplusDovetail_120.jpeg	Hom_Var	5+	80-90	concordant	concordant	v0.6_Call	INS 1:8404900-8405228	INS	300-400	Hom_Var
HG4_CG_vcfBeta_2876	4	30	Insertion	23511312	23511342	212	Het_Var	7	9	0.777778	77.7778	5+	70-80	Het_Var	11	13	0.846154	84.6154	Threshold2	Het_Var	Het_Var	10	12	0.833333	83.3333	concordant	HG4_CG_vcfBeta_2876.jpeg	Het_Var	5+	80-90	concordant	concordant	v0.6_Call	INS 4:23511312-23511342	INS	20-50	Het_Var
HG4_Ill_Krunchall_10620	6	24	Insertion	95373242	95373266	751	Hom_Var	9	9	1	100	5+	90-100	Hom_Var	10	13	0.769231	76.9231	Threshold2	Hom_Var	Hom_Var	10	12	0.833333	83.3333	concordant	HG4_Ill_Krunchall_10620.jpeg	Hom_Var	5+	80-90	concordant	concordant	v0.6_Call	INS 6:95373242-95373266	INS	20-50	Hom_Var
HG4_PB_pbsv_303	1	3046	Insertion	24775172	24778218	1247	Het_Var	4	4	1	100	2018-03-04	90-100	Het_Var	5	9	0.555556	55.5556	Threshold2	Het_Var	Het_Var	5	6	0.833333	83.3333	concordant	HG4_PB_pbsv_303.jpeg	Het_Var	5+	80-90	concordant	concordant	v0.6_Call	INS 1:24775172-24778218	INS	1000-5999	Het_Var
HG4_PB_pbsv_6088	5	2233	Insertion	112481995	112484228	165	Hom_Var	4	5	0.8	80	2018-03-04	70-80	Hom_Var	5	6	0.833333	83.3333	Threshold2	Hom_Var	Hom_Var	5	6	0.833333	83.3333	concordant	HG4_PB_pbsv_6088.jpeg	Hom_Var	5+	80-90	concordant	concordant	v0.6_Call	INS 5:112481995-112484228	INS	1000-5999	Hom_Var
HG3_PB_SVrefine2Falcon1Dovetail_10240	17	168	Insertion	2451426	2451594	365	Hom_Var	2	2	1	100	2018-01-02	90-100	Hom_Var	7	9	0.777778	77.7778	Threshold2	Hom_Var	Hom_Var	5	6	0.833333	83.3333	concordant	HG3_PB_SVrefine2Falcon1Dovetail_10240.jpeg	Hom_Var	5+	80-90	concordant	concordant	v0.6_Call	INS 17:2451426-2451594	INS	100-300	Hom_Var
HG3_Ill_Krunchall_16065	11	83	Insertion	13023205	13023288	1231	Hom_Var	7	8	0.875	87.5	5+	80-90	Hom_Var	12	14	0.857143	85.7143	Threshold2	Hom_Var	Hom_Var	11	13	0.846154	84.6154	concordant	HG3_Ill_Krunchall_16065.jpeg	Hom_Var	5+	80-90	concordant	concordant	v0.6_Call	INS 11:13023205-13023288	INS	50-100	Hom_Var
HG2_Ill_Krunchall_17274	11	22	Insertion	114067125	114067147	943	Hom_Var	6	6	1	100	5+	90-100	Hom_Var	12	14	0.857143	85.7143	Threshold2	Hom_Var	Hom_Var	11	13	0.846154	84.6154	concordant	HG2_Ill_Krunchall_17274.jpeg	Hom_Var	5+	80-90	concordant	concordant	v0.6_Call	INS 11:114067125-114067147	INS	20-50	Hom_Var
HG2_Ill_Spiral_71	1	1105	Insertion	236661478	236662583	763	Het_Var	7	8	0.875	87.5	5+	80-90	Het_Var	11	13	0.846154	84.6154	Threshold2	Het_Var	Het_Var	11	13	0.846154	84.6154	concordant	HG2_Ill_Spiral_71.jpeg	Het_Var	5+	80-90	concordant	concordant	v0.6_Call	INS 1:236661478-236662583	INS	1000-5999	Het_Var
HG2_PB_SVrefine2PBcRplusDovetail_2982	13	6073	Insertion	99519873	99525946	269	Het_Var	4	4	1	100	2018-03-04	90-100	Het_Var	6	8	0.75	75	Threshold2	Het_Var	Het_Var	6	7	0.857143	85.7143	concordant	HG2_PB_SVrefine2PBcRplusDovetail_2982.jpeg	Het_Var	5+	80-90	concordant	concordant	v0.6_Call	INS 13:99519873-99525946	INS	6000+	Het_Var
HG2_PB_PB10Xdip_30863	9	8535	Insertion	136182765	136191300	35	Hom_Var	9	10	0.9	90	5+	80-90	Hom_Var	14	19	0.736842	73.6842	Threshold2	Hom_Var	Hom_Var	12	14	0.857143	85.7143	concordant	HG2_PB_PB10Xdip_30863.jpeg	Hom_Var	5+	80-90	concordant	concordant	v0.6_Call	INS 9:136182765-136191300	INS	6000+	Hom_Var
HG2_Ill_breakscan11_3376	3	6064	Insertion	151148543	151154607	140	Hom_Var	5	6	0.833333	83.3333	5+	80-90	Hom_Var	7	9	0.777778	77.7778	Threshold2	Hom_Var	Hom_Var	6	7	0.857143	85.7143	concordant	HG2_Ill_breakscan11_3376.jpeg	Hom_Var	5+	80-90	concordant	concordant	v0.6_Call	INS 3:151148543-151154607	INS	6000+	Hom_Var
HG4_PB_pbsv_8488	7	6258	Insertion	107829262	107835520	709	Hom_Var	3	4	0.75	75	2018-03-04	70-80	Hom_Var	7	8	0.875	87.5	Threshold2	Hom_Var	Hom_Var	6	7	0.857143	85.7143	concordant	HG4_PB_pbsv_8488.jpeg	Hom_Var	5+	80-90	concordant	concordant	v0.6_Call	INS 7:107829262-107835520	INS	6000+	Hom_Var
HG4_PB_SVrefine2PBcRDovetail_7400	14	6705	Insertion	64268839	64275544	826	Hom_Var	4	4	1	100	2018-03-04	90-100	Hom_Var	7	9	0.777778	77.7778	Threshold2	Hom_Var	Hom_Var	6	7	0.857143	85.7143	concordant	HG4_PB_SVrefine2PBcRDovetail_7400.jpeg	Hom_Var	5+	80-90	concordant	concordant	v0.6_Call	INS 14:64268839-64275544	INS	6000+	Hom_Var
HG2_PB_SVrefine2PB10Xhap12_8656	11	6024	Insertion	1558887	1564911	836	Hom_Var	11	11	1	100	5+	90-100	Hom_Var	13	15	0.866667	86.6667	Threshold2	Hom_Var	Hom_Var	12	14	0.857143	85.7143	concordant	HG2_PB_SVrefine2PB10Xhap12_8656.jpeg	Hom_Var	5+	80-90	concordant	concordant	v0.6_Call	INS 11:1558887-1564911	INS	6000+	Hom_Var
HG2_PB_SVrefine2Falcon1plusDovetail_3945	15	869	Insertion	91198676	91199545	354	Hom_Var	5	5	1	100	5+	90-100	Hom_Var	7	9	0.777778	77.7778	Threshold2	Hom_Var	Hom_Var	6	7	0.857143	85.7143	concordant	HG2_PB_SVrefine2Falcon1plusDovetail_3945.jpeg	Hom_Var	5+	80-90	concordant	concordant	v0.6_Call	INS 15:91198676-91199545	INS	400-1000	Hom_Var
HG2_PB_SVrefine2Falcon2Bionano_6024	11	777	Insertion	61777071	61777848	1173	Hom_Var	4	4	1	100	2018-03-04	90-100	Hom_Var	7	11	0.636364	63.6364	Threshold2	Hom_Var	Hom_Var	6	7	0.857143	85.7143	concordant	HG2_PB_SVrefine2Falcon2Bionano_6024.jpeg	Hom_Var	5+	80-90	concordant	concordant	v0.6_Call	INS 11:61777071-61777848	INS	400-1000	Hom_Var
HG3_PB_pbsv_8271	7	344	Insertion	108551218	108551562	10	Hom_Var	12	14	0.857143	85.7143	5+	80-90	Hom_Var	25	31	0.806452	80.6452	Threshold2	Hom_Var	Hom_Var	18	21	0.857143	85.7143	concordant	HG3_PB_pbsv_8271.jpeg	Hom_Var	5+	80-90	concordant	concordant	v0.6_Call	INS 7:108551218-108551562	INS	300-400	Hom_Var
HG3_Ill_SVrefine2DISCOVARDovetail_1539	2	385	Insertion	120451454	120451839	1205	Hom_Var	8	8	1	100	5+	90-100	Hom_Var	13	15	0.866667	86.6667	Threshold2	Hom_Var	Hom_Var	12	14	0.857143	85.7143	concordant	HG3_Ill_SVrefine2DISCOVARDovetail_1539.jpeg	Hom_Var	5+	80-90	concordant	concordant	v0.6_Call	INS 2:120451454-120451839	INS	300-400	Hom_Var
HG4_Ill_svaba_5511	4	28	Insertion	13712785	13712813	981	Hom_Var	8	8	1	100	5+	90-100	Hom_Var	12	16	0.75	75	Threshold2	Hom_Var	Hom_Var	12	14	0.857143	85.7143	concordant	HG4_Ill_svaba_5511.jpeg	Hom_Var	5+	80-90	concordant	concordant	v0.6_Call	INS 4:13712785-13712813	INS	20-50	Hom_Var
HG2_PB_pbsv_3932	3	2149	Insertion	189959398	189961547	560	Het_Var	4	4	1	100	2018-03-04	90-100	Het_Var	6	8	0.75	75	Threshold2	Het_Var	Het_Var	6	7	0.857143	85.7143	concordant	HG2_PB_pbsv_3932.jpeg	Het_Var	5+	80-90	concordant	concordant	v0.6_Call	INS 3:189959398-189961547	INS	1000-5999	Het_Var
HG3_PB_SVrefine2Falcon1Dovetail_9613	16	1962	Insertion	1921895	1923857	578	Hom_Var	4	4	1	100	2018-03-04	90-100	Hom_Var	7	9	0.777778	77.7778	Threshold2	Hom_Var	Hom_Var	6	7	0.857143	85.7143	concordant	HG3_PB_SVrefine2Falcon1Dovetail_9613.jpeg	Hom_Var	5+	80-90	concordant	concordant	v0.6_Call	INS 16:1921895-1923857	INS	1000-5999	Hom_Var
HG4_PB_HySA_2647	2	1289	Insertion	32046160	32047449	666	Hom_Var	9	9	1	100	5+	90-100	Hom_Var	13	15	0.866667	86.6667	Threshold2	Hom_Var	Hom_Var	12	14	0.857143	85.7143	concordant	HG4_PB_HySA_2647.jpeg	Hom_Var	5+	80-90	concordant	concordant	v0.6_Call	INS 2:32046160-32047449	INS	1000-5999	Hom_Var
HG3_PB_HySA_14015	8	191	Insertion	33319678	33319869	980	Hom_Var	4	4	1	100	2018-03-04	90-100	Hom_Var	7	8	0.875	87.5	Threshold2	Hom_Var	Hom_Var	6	7	0.857143	85.7143	concordant	HG3_PB_HySA_14015.jpeg	Hom_Var	5+	80-90	concordant	concordant	v0.6_Call	INS 8:33319678-33319869	INS	100-300	Hom_Var
HG2_PB_SVrefine2PBcRplusDovetail_652	1	164	Insertion	169962742	169962906	1242	Hom_Var	8	8	1	100	5+	90-100	Hom_Var	13	15	0.866667	86.6667	Threshold2	Hom_Var	Hom_Var	12	14	0.857143	85.7143	concordant	HG2_PB_SVrefine2PBcRplusDovetail_652.jpeg	Hom_Var	5+	80-90	concordant	concordant	v0.6_Call	INS 1:169962742-169962906	INS	100-300	Hom_Var
HG2_PB_SVrefine2PBcRplusDovetail_5659	2	307	Insertion	65333781	65334088	942	Hom_Var	9	10	0.9	90	5+	80-90	Hom_Var	13	15	0.866667	86.6667	Threshold2	Hom_Var	Hom_Var	13	15	0.866667	86.6667	concordant	HG2_PB_SVrefine2PBcRplusDovetail_5659.jpeg	Hom_Var	5+	80-90	concordant	concordant	v0.6_Call	INS 2:65333781-65334088	INS	300-400	Hom_Var
HG2_PB_SVrefine2Falcon1plusDovetail_4101	16	6044	Insertion	7435956	7442000	1080	Het_Var	5	5	1	100	5+	90-100	Het_Var	7	10	0.7	70	Threshold2	Het_Var	Het_Var	7	8	0.875	87.5	concordant	HG2_PB_SVrefine2Falcon1plusDovetail_4101.jpeg	Het_Var	5+	80-90	concordant	concordant	v0.6_Call	INS 16:7435956-7442000	INS	6000+	Het_Var
HG4_PB_SVrefine2Falcon1Dovetail_1302	2	6152	Insertion	116695720	116701872	1144	Het_Var	5	5	1	100	5+	90-100	Het_Var	8	11	0.727273	72.7273	Threshold2	Het_Var	Het_Var	7	8	0.875	87.5	concordant	HG4_PB_SVrefine2Falcon1Dovetail_1302.jpeg	Het_Var	5+	80-90	concordant	concordant	v0.6_Call	INS 2:116695720-116701872	INS	6000+	Het_Var
HG4_PB_SVrefine2PBcRDovetail_1989	3	6727	Insertion	175100375	175107102	1179	Het_Var	5	5	1	100	5+	90-100	Het_Var	8	10	0.8	80	Threshold2	Het_Var	Het_Var	7	8	0.875	87.5	concordant	HG4_PB_SVrefine2PBcRDovetail_1989.jpeg	Het_Var	5+	80-90	concordant	concordant	v0.6_Call	INS 3:175100375-175107102	INS	6000+	Het_Var
HG2_PB_SVrefine2PB10Xhap12_2743	3	6078	Insertion	151148543	151154621	544	Hom_Var	4	5	0.8	80	2018-03-04	70-80	Hom_Var	7	9	0.777778	77.7778	Threshold2	Hom_Var	Hom_Var	7	8	0.875	87.5	concordant	HG2_PB_SVrefine2PB10Xhap12_2743.jpeg	Hom_Var	5+	80-90	concordant	concordant	v0.6_Call	INS 3:151148543-151154621	INS	6000+	Hom_Var
HG2_PB_SVrefine2Falcon2Bionano_484	1	8512	Insertion	248567482	248575994	695	Hom_Var	4	5	0.8	80	2018-03-04	70-80	Hom_Var	8	10	0.8	80	Threshold2	Hom_Var	Hom_Var	7	8	0.875	87.5	concordant	HG2_PB_SVrefine2Falcon2Bionano_484.jpeg	Hom_Var	5+	80-90	concordant	concordant	v0.6_Call	INS 1:248567482-248575994	INS	6000+	Hom_Var
HG4_Ill_GATKHC_2290	1	61	Insertion	249069902	249069963	346	Het_Var	5	6	0.833333	83.3333	5+	80-90	Het_Var	7	9	0.777778	77.7778	Threshold2	Het_Var	Het_Var	7	8	0.875	87.5	concordant	HG4_Ill_GATKHC_2290.jpeg	Het_Var	5+	80-90	concordant	concordant	v0.6_Call	INS 1:249069902-249069963	INS	50-100	Het_Var
HG2_PB_assemblyticsfalcon_5058	11	53	Insertion	133519916	133519969	1054	Het_Var	6	6	1	100	5+	90-100	Het_Var	8	10	0.8	80	Threshold2	Het_Var	Het_Var	7	8	0.875	87.5	concordant	HG2_PB_assemblyticsfalcon_5058.jpeg	Het_Var	5+	80-90	concordant	concordant	v0.6_Call	INS 11:133519916-133519969	INS	50-100	Het_Var
HG2_PB_HySA_27982	15	89	Insertion	47571300	47571389	690	Hom_Var	4	5	0.8	80	2018-03-04	70-80	Hom_Var	9	10	0.9	90	Threshold2	Hom_Var	Hom_Var	7	8	0.875	87.5	concordant	HG2_PB_HySA_27982.jpeg	Hom_Var	5+	80-90	concordant	concordant	v0.6_Call	INS 15:47571300-47571389	INS	50-100	Hom_Var
HG3_PB_pbsv_10695	10	441	Insertion	3473528	3473969	1026	Hom_Var	5	5	1	100	5+	90-100	Hom_Var	7	8	0.875	87.5	Threshold2	Hom_Var	Hom_Var	7	8	0.875	87.5	concordant	HG3_PB_pbsv_10695.jpeg	Hom_Var	5+	80-90	concordant	concordant	v0.6_Call	INS 10:3473528-3473969	INS	400-1000	Hom_Var
HG2_PB_pbsv_515	1	377	Insertion	62603354	62603731	516	Hom_Var	4	4	1	100	2018-03-04	90-100	Hom_Var	8	10	0.8	80	Threshold2	Hom_Var	Hom_Var	7	8	0.875	87.5	concordant	HG2_PB_pbsv_515.jpeg	Hom_Var	5+	80-90	concordant	concordant	v0.6_Call	INS 1:62603354-62603731	INS	300-400	Hom_Var
HG2_Ill_Krunchall_4831	3	32	Insertion	86868668	86868700	758	Het_Var	5	6	0.833333	83.3333	5+	80-90	Het_Var	7	10	0.7	70	Threshold2	Het_Var	Het_Var	7	8	0.875	87.5	concordant	HG2_Ill_Krunchall_4831.jpeg	Het_Var	5+	80-90	concordant	concordant	v0.6_Call	INS 3:86868668-86868700	INS	20-50	Het_Var
HG3_Ill_GATKHC_17356	10	29	Insertion	383740	383769	20	Hom_Var	12	13	0.923077	92.3077	5+	90-100	Hom_Var	17	22	0.772727	77.2727	Threshold2	Hom_Var	Hom_Var	14	16	0.875	87.5	concordant	HG3_Ill_GATKHC_17356.jpeg	Hom_Var	5+	80-90	concordant	concordant	v0.6_Call	INS 10:383740-383769	INS	20-50	Hom_Var
HG4_Ill_scalpel_6915	6	24	Insertion	96068397	96068421	596	Hom_Var	5	6	0.833333	83.3333	5+	80-90	Hom_Var	9	10	0.9	90	Threshold2	Hom_Var	Hom_Var	7	8	0.875	87.5	concordant	HG4_Ill_scalpel_6915.jpeg	Hom_Var	5+	80-90	concordant	concordant	v0.6_Call	INS 6:96068397-96068421	INS	20-50	Hom_Var
HG2_PB_HySA_19338	9	30	Insertion	135687917	135687947	702	Hom_Var	7	7	1	100	5+	90-100	Hom_Var	9	10	0.9	90	Threshold2	Hom_Var	Hom_Var	7	8	0.875	87.5	concordant	HG2_PB_HySA_19338.jpeg	Hom_Var	5+	80-90	concordant	concordant	v0.6_Call	INS 9:135687917-135687947	INS	20-50	Hom_Var
HG2_PB_PB10Xdip_29276	8	2326	Insertion	103554128	103556454	1081	Het_Var	3	3	1	100	2018-03-04	90-100	Het_Var	8	9	0.888889	88.8889	Threshold2	Het_Var	Het_Var	7	8	0.875	87.5	concordant	HG2_PB_PB10Xdip_29276.jpeg	Het_Var	5+	80-90	concordant	concordant	v0.6_Call	INS 8:103554128-103556454	INS	1000-5999	Het_Var
HG2_PB_SVrefine2Falcon2Bionano_7266	13	178	Insertion	113886294	113886472	725	Het_Var	5	5	1	100	5+	90-100	Het_Var	7	11	0.636364	63.6364	Threshold2	Het_Var	Het_Var	7	8	0.875	87.5	concordant	HG2_PB_SVrefine2Falcon2Bionano_7266.jpeg	Het_Var	5+	80-90	concordant	concordant	v0.6_Call	INS 13:113886294-113886472	INS	100-300	Het_Var
HG2_PB_SVrefine2Falcon1plusDovetail_10517	6	6017	Insertion	142450103	142456120	19	Hom_Var	12	14	0.857143	85.7143	5+	80-90	Hom_Var	18	26	0.692308	69.2308	Threshold2	Hom_Var	Hom_Var	16	18	0.888889	88.8889	concordant	HG2_PB_SVrefine2Falcon1plusDovetail_10517.jpeg	Hom_Var	5+	80-90	concordant	concordant	v0.6_Call	INS 6:142450103-142456120	INS	6000+	Hom_Var
HG2_PB_SVrefine2PBcRplusDovetail_1712	11	6815	Insertion	25244524	25251339	1074	Hom_Var	4	4	1	100	2018-03-04	90-100	Hom_Var	8	11	0.727273	72.7273	Threshold2	Hom_Var	Hom_Var	8	9	0.888889	88.8889	concordant	HG2_PB_SVrefine2PBcRplusDovetail_1712.jpeg	Hom_Var	5+	80-90	concordant	concordant	v0.6_Call	INS 11:25244524-25251339	INS	6000+	Hom_Var
HG4_PB_pbsv_1641	2	75	Insertion	6636079	6636154	49	Het_Var	5	5	1	100	5+	90-100	Het_Var	9	10	0.9	90	Threshold2	Het_Var	Het_Var	8	9	0.888889	88.8889	concordant	HG4_PB_pbsv_1641.jpeg	Het_Var	5+	80-90	concordant	concordant	v0.6_Call	INS 2:6636079-6636154	INS	50-100	Het_Var
HG3_Ill_Cortex_2385	3	70	Insertion	53269957	53270027	335	Hom_Var	6	6	1	100	5+	90-100	Hom_Var	8	9	0.888889	88.8889	Threshold2	Hom_Var	Hom_Var	8	9	0.888889	88.8889	concordant	HG3_Ill_Cortex_2385.jpeg	Hom_Var	5+	80-90	concordant	concordant	v0.6_Call	INS 3:53269957-53270027	INS	50-100	Hom_Var
HG2_PB_PB10Xdip_22501	4	55	Insertion	66469801	66469856	342	Hom_Var	8	8	1	100	5+	90-100	Hom_Var	9	10	0.9	90	Threshold2	Hom_Var	Hom_Var	8	9	0.888889	88.8889	concordant	HG2_PB_PB10Xdip_22501.jpeg	Hom_Var	5+	80-90	concordant	concordant	v0.6_Call	INS 4:66469801-66469856	INS	50-100	Hom_Var
HG2_PB_SVrefine2PBcRplusDovetail_1901	11	69	Insertion	69061499	69061568	547	Hom_Var	4	4	1	100	2018-03-04	90-100	Hom_Var	9	11	0.818182	81.8182	Threshold2	Hom_Var	Hom_Var	8	9	0.888889	88.8889	concordant	HG2_PB_SVrefine2PBcRplusDovetail_1901.jpeg	Hom_Var	5+	80-90	concordant	concordant	v0.6_Call	INS 11:69061499-69061568	INS	50-100	Hom_Var
HG4_PB_HySA_13971	8	326	Insertion	96783532	96783858	151	Het_Var	5	6	0.833333	83.3333	5+	80-90	Het_Var	8	10	0.8	80	Threshold2	Het_Var	Het_Var	8	9	0.888889	88.8889	concordant	HG4_PB_HySA_13971.jpeg	Het_Var	5+	80-90	concordant	concordant	v0.6_Call	INS 8:96783532-96783858	INS	300-400	Het_Var
HG2_PB_assemblyticsPBcR_24666	7	31	Insertion	131275585	131275616	600	Het_Var	5	6	0.833333	83.3333	5+	80-90	Het_Var	8	9	0.888889	88.8889	Threshold2	Het_Var	Het_Var	8	9	0.888889	88.8889	concordant	HG2_PB_assemblyticsPBcR_24666.jpeg	Het_Var	5+	80-90	concordant	concordant	v0.6_Call	INS 7:131275585-131275616	INS	20-50	Het_Var
HG3_Ill_scalpel_4797	4	23	Insertion	111511708	111511731	864	Het_Var	5	6	0.833333	83.3333	5+	80-90	Het_Var	8	9	0.888889	88.8889	Threshold2	Het_Var	Het_Var	8	9	0.888889	88.8889	concordant	HG3_Ill_scalpel_4797.jpeg	Het_Var	5+	80-90	concordant	concordant	v0.6_Call	INS 4:111511708-111511731	INS	20-50	Het_Var
HG4_Ill_Krunchall_22535	17	24	Insertion	8488604	8488628	434	Hom_Var	6	6	1	100	5+	90-100	Hom_Var	8	10	0.8	80	Threshold2	Hom_Var	Hom_Var	8	9	0.888889	88.8889	concordant	HG4_Ill_Krunchall_22535.jpeg	Hom_Var	5+	80-90	concordant	concordant	v0.6_Call	INS 17:8488604-8488628	INS	20-50	Hom_Var
HG2_Ill_SpiralSDKrefine_9399	2	20	Insertion	220245564	220245584	777	Hom_Var	5	5	1	100	5+	90-100	Hom_Var	8	9	0.888889	88.8889	Threshold2	Hom_Var	Hom_Var	8	9	0.888889	88.8889	concordant	HG2_Ill_SpiralSDKrefine_9399.jpeg	Hom_Var	5+	80-90	concordant	concordant	v0.6_Call	INS 2:220245564-220245584	INS	20-50	Hom_Var
HG2_Ill_SpiralSDKrefine_2074	10	23	Insertion	103353935	103353958	1290	Hom_Var	6	6	1	100	5+	90-100	Hom_Var	9	11	0.818182	81.8182	Threshold2	Hom_Var	Hom_Var	8	9	0.888889	88.8889	concordant	HG2_Ill_SpiralSDKrefine_2074.jpeg	Hom_Var	5+	80-90	concordant	concordant	v0.6_Call	INS 10:103353935-103353958	INS	20-50	Hom_Var
HG3_PB_HySA_2808	2	2920	Insertion	47809988	47812908	573	Het_Var	5	5	1	100	5+	90-100	Het_Var	8	10	0.8	80	Threshold2	Het_Var	Het_Var	8	9	0.888889	88.8889	concordant	HG3_PB_HySA_2808.jpeg	Het_Var	5+	80-90	concordant	concordant	v0.6_Call	INS 2:47809988-47812908	INS	1000-5999	Het_Var
HG2_PB_SVrefine2PBcRplusDovetail_2042	11	1726	Insertion	114713679	114715405	306	Hom_Var	5	5	1	100	5+	90-100	Hom_Var	8	9	0.888889	88.8889	Threshold2	Hom_Var	Hom_Var	8	9	0.888889	88.8889	concordant	HG2_PB_SVrefine2PBcRplusDovetail_2042.jpeg	Hom_Var	5+	80-90	concordant	concordant	v0.6_Call	INS 11:114713679-114715405	INS	1000-5999	Hom_Var
HG3_PB_SVrefine2PBcRDovetail_2101	4	4032	Insertion	76674935	76678967	776	Hom_Var	6	6	1	100	5+	90-100	Hom_Var	8	10	0.8	80	Threshold2	Hom_Var	Hom_Var	8	9	0.888889	88.8889	concordant	HG3_PB_SVrefine2PBcRDovetail_2101.jpeg	Hom_Var	5+	80-90	concordant	concordant	v0.6_Call	INS 4:76674935-76678967	INS	1000-5999	Hom_Var
HG4_PB_SVrefine2Falcon1Dovetail_244	1	1653	Insertion	33652418	33654071	804	Hom_Var	6	7	0.857143	85.7143	5+	80-90	Hom_Var	9	12	0.75	75	Threshold2	Hom_Var	Hom_Var	8	9	0.888889	88.8889	concordant	HG4_PB_SVrefine2Falcon1Dovetail_244.jpeg	Hom_Var	5+	80-90	concordant	concordant	v0.6_Call	INS 1:33652418-33654071	INS	1000-5999	Hom_Var
HG2_PB_SVrefine2Falcon1plusDovetail_4637	17	110	Insertion	2623091	2623201	1008	Hom_Var	7	7	1	100	5+	90-100	Hom_Var	9	10	0.9	90	Threshold2	Hom_Var	Hom_Var	8	9	0.888889	88.8889	concordant	HG2_PB_SVrefine2Falcon1plusDovetail_4637.jpeg	Hom_Var	5+	80-90	concordant	concordant	v0.6_Call	INS 17:2623091-2623201	INS	100-300	Hom_Var
HG2_Ill_GATKHCSBGrefine_8314	11	104	Insertion	62153911	62154015	1171	Hom_Var	4	4	1	100	2018-03-04	90-100	Hom_Var	8	10	0.8	80	Threshold2	Hom_Var	Hom_Var	8	9	0.888889	88.8889	concordant	HG2_Ill_GATKHCSBGrefine_8314.jpeg	Hom_Var	5+	80-90	concordant	concordant	v0.6_Call	INS 11:62153911-62154015	INS	100-300	Hom_Var
HG2_PB_PB10Xdip_24678	6	6054	Insertion	13503035	13509089	402	Het_Var	6	6	1	100	5+	90-100	Het_Var	10	11	0.909091	90.9091	Threshold2	Het_Var	Het_Var	9	10	0.9	90	concordant	HG2_PB_PB10Xdip_24678.jpeg	Het_Var	5+	80-90	concordant	concordant	v0.6_Call	INS 6:13503035-13509089	INS	6000+	Het_Var
HG2_Ill_GATKHC_19953	11	92	Insertion	74368011	74368103	74	Hom_Var	7	7	1	100	5+	90-100	Hom_Var	10	12	0.833333	83.3333	Threshold2	Hom_Var	Hom_Var	9	10	0.9	90	concordant	HG2_Ill_GATKHC_19953.jpeg	Hom_Var	5+	80-90	concordant	concordant	v0.6_Call	INS 11:74368011-74368103	INS	50-100	Hom_Var
HG3_PB_HySA_6168	3	79	Insertion	191108200	191108279	132	Hom_Var	7	7	1	100	5+	90-100	Hom_Var	9	11	0.818182	81.8182	Threshold2	Hom_Var	Hom_Var	9	10	0.9	90	concordant	HG3_PB_HySA_6168.jpeg	Hom_Var	5+	80-90	concordant	concordant	v0.6_Call	INS 3:191108200-191108279	INS	50-100	Hom_Var
HG3_PB_SVrefine2PBcRDovetail_7251	15	766	Insertion	59725444	59726210	1228	Het_Var	4	5	0.8	80	2018-03-04	70-80	Het_Var	9	10	0.9	90	Threshold2	Het_Var	Het_Var	9	10	0.9	90	concordant	HG3_PB_SVrefine2PBcRDovetail_7251.jpeg	Het_Var	5+	80-90	concordant	concordant	v0.6_Call	INS 15:59725444-59726210	INS	400-1000	Het_Var
HG3_Ill_GATKHCSBGrefine_4694	6	377	Insertion	40622896	40623273	604	Hom_Var	6	6	1	100	5+	90-100	Hom_Var	9	10	0.9	90	Threshold2	Hom_Var	Hom_Var	9	10	0.9	90	concordant	HG3_Ill_GATKHCSBGrefine_4694.jpeg	Hom_Var	5+	80-90	concordant	concordant	v0.6_Call	INS 6:40622896-40623273	INS	300-400	Hom_Var
HG2_PB_assemblyticsPBcR_27417	9	31	Insertion	128339944	128339975	193	Hom_Var	3	4	0.75	75	2018-03-04	70-80	Hom_Var	10	13	0.769231	76.9231	Threshold2	Hom_Var	Hom_Var	9	10	0.9	90	concordant	HG2_PB_assemblyticsPBcR_27417.jpeg	Hom_Var	5+	80-90	concordant	concordant	v0.6_Call	INS 9:128339944-128339975	INS	20-50	Hom_Var
HG3_Ill_svaba_12365	8	31	Insertion	118939645	118939676	806	Hom_Var	6	6	1	100	5+	90-100	Hom_Var	11	12	0.916667	91.6667	Threshold2	Hom_Var	Hom_Var	9	10	0.9	90	concordant	HG3_Ill_svaba_12365.jpeg	Hom_Var	5+	80-90	concordant	concordant	v0.6_Call	INS 8:118939645-118939676	INS	20-50	Hom_Var
HG2_PB_HySA_28281	15	1853	Insertion	74508950	74510803	18	Hom_Var	13	13	1	100	5+	90-100	Hom_Var	20	26	0.769231	76.9231	Threshold2	Hom_Var	Hom_Var	18	20	0.9	90	concordant	HG2_PB_HySA_28281.jpeg	Hom_Var	5+	80-90	concordant	concordant	v0.6_Call	INS 15:74508950-74510803	INS	1000-5999	Hom_Var
HG2_PB_SVrefine2PB10Xhap12_6041	7	682	Insertion	76044023	76044705	17	Hom_Var	13	14	0.928571	92.8571	5+	90-100	Hom_Var	25	28	0.892857	89.2857	Threshold2	Hom_Var	Hom_Var	19	21	0.904762	90.4762	concordant	HG2_PB_SVrefine2PB10Xhap12_6041.jpeg	Hom_Var	5+	90-100	concordant	concordant	v0.6_Call	INS 7:76044023-76044705	INS	400-1000	Hom_Var
HG2_Ill_breakscan11_3201	2	6146	Insertion	116695720	116701866	286	Het_Var	8	8	1	100	5+	90-100	Het_Var	11	13	0.846154	84.6154	Threshold2	Het_Var	Het_Var	10	11	0.909091	90.9091	concordant	HG2_Ill_breakscan11_3201.jpeg	Het_Var	5+	90-100	concordant	concordant	v0.6_Call	INS 2:116695720-116701866	INS	6000+	Het_Var
HG2_PB_pbsv_7897	7	64	Insertion	8838205	8838269	316	Het_Var	7	7	1	100	5+	90-100	Het_Var	10	13	0.769231	76.9231	Threshold2	Het_Var	Het_Var	10	11	0.909091	90.9091	concordant	HG2_PB_pbsv_7897.jpeg	Het_Var	5+	90-100	concordant	concordant	v0.6_Call	INS 7:8838205-8838269	INS	50-100	Het_Var
HG2_Ill_GATKHCSBGrefine_1197	2	84	Insertion	45448842	45448926	735	Het_Var	7	7	1	100	5+	90-100	Het_Var	12	14	0.857143	85.7143	Threshold2	Het_Var	Het_Var	10	11	0.909091	90.9091	concordant	HG2_Ill_GATKHCSBGrefine_1197.jpeg	Het_Var	5+	90-100	concordant	concordant	v0.6_Call	INS 2:45448842-45448926	INS	50-100	Het_Var
HG3_PB_pbsv_8147	7	71	Insertion	88790931	88791002	1200	Het_Var	7	7	1	100	5+	90-100	Het_Var	11	14	0.785714	78.5714	Threshold2	Het_Var	Het_Var	10	11	0.909091	90.9091	concordant	HG3_PB_pbsv_8147.jpeg	Het_Var	5+	90-100	concordant	concordant	v0.6_Call	INS 7:88790931-88791002	INS	50-100	Het_Var
HG2_PB_PB10Xdip_9356	14	96	Insertion	100811401	100811497	912	Hom_Var	5	6	0.833333	83.3333	5+	80-90	Hom_Var	10	11	0.909091	90.9091	Threshold2	Hom_Var	Hom_Var	10	11	0.909091	90.9091	concordant	HG2_PB_PB10Xdip_9356.jpeg	Hom_Var	5+	90-100	concordant	concordant	v0.6_Call	INS 14:100811401-100811497	INS	50-100	Hom_Var
HG2_PB_HySA_7420	3	736	Insertion	183190822	183191558	1229	Het_Var	6	6	1	100	5+	90-100	Het_Var	10	12	0.833333	83.3333	Threshold2	Het_Var	Het_Var	10	11	0.909091	90.9091	concordant	HG2_PB_HySA_7420.jpeg	Het_Var	5+	90-100	concordant	concordant	v0.6_Call	INS 3:183190822-183191558	INS	400-1000	Het_Var
HG2_PB_SVrefine2PBcRplusDovetail_9783	6	482	Insertion	141693585	141694067	874	Hom_Var	7	8	0.875	87.5	5+	80-90	Hom_Var	12	13	0.923077	92.3077	Threshold2	Hom_Var	Hom_Var	10	11	0.909091	90.9091	concordant	HG2_PB_SVrefine2PBcRplusDovetail_9783.jpeg	Hom_Var	5+	90-100	concordant	concordant	v0.6_Call	INS 6:141693585-141694067	INS	400-1000	Hom_Var
HG2_PB_SVrefine2Falcon2Bionano_4161	7	310	Insertion	126661391	126661701	145	Het_Var	8	9	0.888889	88.8889	5+	80-90	Het_Var	10	12	0.833333	83.3333	Threshold2	Het_Var	Het_Var	10	11	0.909091	90.9091	concordant	HG2_PB_SVrefine2Falcon2Bionano_4161.jpeg	Het_Var	5+	90-100	concordant	concordant	v0.6_Call	INS 7:126661391-126661701	INS	300-400	Het_Var
HG2_Ill_MetaSV_3432	3	322	Insertion	188883211	188883533	1262	Het_Var	7	7	1	100	5+	90-100	Het_Var	10	13	0.769231	76.9231	Threshold2	Het_Var	Het_Var	10	11	0.909091	90.9091	concordant	HG2_Ill_MetaSV_3432.jpeg	Het_Var	5+	90-100	concordant	concordant	v0.6_Call	INS 3:188883211-188883533	INS	300-400	Het_Var
HG3_PB_pbsv_10552	9	371	Insertion	140843592	140843963	386	Hom_Var	9	9	1	100	5+	90-100	Hom_Var	11	12	0.916667	91.6667	Threshold2	Hom_Var	Hom_Var	10	11	0.909091	90.9091	concordant	HG3_PB_pbsv_10552.jpeg	Hom_Var	5+	90-100	concordant	concordant	v0.6_Call	INS 9:140843592-140843963	INS	300-400	Hom_Var
HG3_Ill_SVrefine2DISCOVARDovetail_3512	4	346	Insertion	67963878	67964224	694	Hom_Var	7	7	1	100	5+	90-100	Hom_Var	11	12	0.916667	91.6667	Threshold2	Hom_Var	Hom_Var	10	11	0.909091	90.9091	concordant	HG3_Ill_SVrefine2DISCOVARDovetail_3512.jpeg	Hom_Var	5+	90-100	concordant	concordant	v0.6_Call	INS 4:67963878-67964224	INS	300-400	Hom_Var
HG3_Ill_GATKHCSBGrefine_81	1	318	Insertion	9230424	9230742	781	Hom_Var	8	8	1	100	5+	90-100	Hom_Var	10	12	0.833333	83.3333	Threshold2	Hom_Var	Hom_Var	10	11	0.909091	90.9091	concordant	HG3_Ill_GATKHCSBGrefine_81.jpeg	Hom_Var	5+	90-100	concordant	concordant	v0.6_Call	INS 1:9230424-9230742	INS	300-400	Hom_Var
HG3_Ill_GATKHC_23634	14	25	Insertion	75666390	75666415	756	Het_Var	6	6	1	100	5+	90-100	Het_Var	10	12	0.833333	83.3333	Threshold2	Het_Var	Het_Var	10	11	0.909091	90.9091	concordant	HG3_Ill_GATKHC_23634.jpeg	Het_Var	5+	90-100	concordant	concordant	v0.6_Call	INS 14:75666390-75666415	INS	20-50	Het_Var
HG2_PB_assemblyticsPBcR_8326	15	30	Insertion	26496956	26496986	505	Hom_Var	7	7	1	100	5+	90-100	Hom_Var	11	12	0.916667	91.6667	Threshold2	Hom_Var	Hom_Var	10	11	0.909091	90.9091	concordant	HG2_PB_assemblyticsPBcR_8326.jpeg	Hom_Var	5+	90-100	concordant	concordant	v0.6_Call	INS 15:26496956-26496986	INS	20-50	Hom_Var
HG2_PB_SVrefine2PB10Xhap12_7038	8	2342	Insertion	109135921	109138263	755	Het_Var	7	8	0.875	87.5	5+	80-90	Het_Var	11	12	0.916667	91.6667	Threshold2	Het_Var	Het_Var	10	11	0.909091	90.9091	concordant	HG2_PB_SVrefine2PB10Xhap12_7038.jpeg	Het_Var	5+	90-100	concordant	concordant	v0.6_Call	INS 8:109135921-109138263	INS	1000-5999	Het_Var
HG2_PB_PB10Xdip_29972	8	1056	Insertion	37502918	37503974	902	Hom_Var	6	6	1	100	5+	90-100	Hom_Var	11	14	0.785714	78.5714	Threshold2	Hom_Var	Hom_Var	10	11	0.909091	90.9091	concordant	HG2_PB_PB10Xdip_29972.jpeg	Hom_Var	5+	90-100	concordant	concordant	v0.6_Call	INS 8:37502918-37503974	INS	1000-5999	Hom_Var
HG2_PB_SVrefine2PB10Xhap12_1699	2	106	Insertion	120418494	120418600	210	Het_Var	6	7	0.857143	85.7143	5+	80-90	Het_Var	10	11	0.909091	90.9091	Threshold2	Het_Var	Het_Var	10	11	0.909091	90.9091	concordant	HG2_PB_SVrefine2PB10Xhap12_1699.jpeg	Het_Var	5+	90-100	concordant	concordant	v0.6_Call	INS 2:120418494-120418600	INS	100-300	Het_Var
HG4_Ill_manta_3022	11	62	Insertion	134509146	134509208	685	Het_Var	7	7	1	100	5+	90-100	Het_Var	11	12	0.916667	91.6667	Threshold2	Het_Var	Het_Var	11	12	0.916667	91.6667	concordant	HG4_Ill_manta_3022.jpeg	Het_Var	5+	90-100	concordant	concordant	v0.6_Call	INS 11:134509146-134509208	INS	50-100	Het_Var
HG4_Ill_Krunchall_1468	1	70	Insertion	194445279	194445349	924	Het_Var	8	8	1	100	5+	90-100	Het_Var	12	14	0.857143	85.7143	Threshold2	Het_Var	Het_Var	11	12	0.916667	91.6667	concordant	HG4_Ill_Krunchall_1468.jpeg	Het_Var	5+	90-100	concordant	concordant	v0.6_Call	INS 1:194445279-194445349	INS	50-100	Het_Var
HG2_Ill_GATKHC_3637	2	55	Insertion	131721478	131721533	964	Hom_Var	6	6	1	100	5+	90-100	Hom_Var	12	13	0.923077	92.3077	Threshold2	Hom_Var	Hom_Var	11	12	0.916667	91.6667	concordant	HG2_Ill_GATKHC_3637.jpeg	Hom_Var	5+	90-100	concordant	concordant	v0.6_Call	INS 2:131721478-131721533	INS	50-100	Hom_Var
HG4_Ill_SVrefine2DISCOVARDovetail_10885	15	771	Insertion	59725444	59726215	736	Het_Var	6	7	0.857143	85.7143	5+	80-90	Het_Var	11	13	0.846154	84.6154	Threshold2	Het_Var	Het_Var	11	12	0.916667	91.6667	concordant	HG4_Ill_SVrefine2DISCOVARDovetail_10885.jpeg	Het_Var	5+	90-100	concordant	concordant	v0.6_Call	INS 15:59725444-59726215	INS	400-1000	Het_Var
HG2_PB_PB10Xdip_28629	7	705	Insertion	64289937	64290642	765	Hom_Var	6	6	1	100	5+	90-100	Hom_Var	13	14	0.928571	92.8571	Threshold2	Hom_Var	Hom_Var	11	12	0.916667	91.6667	concordant	HG2_PB_PB10Xdip_28629.jpeg	Hom_Var	5+	90-100	concordant	concordant	v0.6_Call	INS 7:64289937-64290642	INS	400-1000	Hom_Var
HG2_PB_SVrefine2Falcon1plusDovetail_6390	2	316	Insertion	148477006	148477322	754	Het_Var	8	8	1	100	5+	90-100	Het_Var	13	14	0.928571	92.8571	Threshold2	Het_Var	Het_Var	11	12	0.916667	91.6667	concordant	HG2_PB_SVrefine2Falcon1plusDovetail_6390.jpeg	Het_Var	5+	90-100	concordant	concordant	v0.6_Call	INS 2:148477006-148477322	INS	300-400	Het_Var
HG2_PB_SVrefine2Falcon2Bionano_976	2	330	Insertion	160158998	160159328	1283	Hom_Var	7	7	1	100	5+	90-100	Hom_Var	11	12	0.916667	91.6667	Threshold2	Hom_Var	Hom_Var	11	12	0.916667	91.6667	concordant	HG2_PB_SVrefine2Falcon2Bionano_976.jpeg	Hom_Var	5+	90-100	concordant	concordant	v0.6_Call	INS 2:160158998-160159328	INS	300-400	Hom_Var
HG4_Ill_svaba_5893	4	50	Insertion	63195290	63195340	634	Het_Var	7	8	0.875	87.5	5+	80-90	Het_Var	12	13	0.923077	92.3077	Threshold2	Het_Var	Het_Var	11	12	0.916667	91.6667	concordant	HG4_Ill_svaba_5893.jpeg	Het_Var	5+	90-100	concordant	concordant	v0.6_Call	INS 4:63195290-63195340	INS	20-50	Het_Var
HG3_Ill_250bpfermikitraw_10235	6	22	Insertion	162278010	162278032	400	Hom_Var	7	7	1	100	5+	90-100	Hom_Var	15	16	0.9375	93.75	Threshold2	Hom_Var	Hom_Var	11	12	0.916667	91.6667	concordant	HG3_Ill_250bpfermikitraw_10235.jpeg	Hom_Var	5+	90-100	concordant	concordant	v0.6_Call	INS 6:162278010-162278032	INS	20-50	Hom_Var
HG4_PB_SVrefine2PBcRDovetail_4591	8	2276	Insertion	21624306	21626582	630	Hom_Var	7	8	0.875	87.5	5+	80-90	Hom_Var	13	15	0.866667	86.6667	Threshold2	Hom_Var	Hom_Var	11	12	0.916667	91.6667	concordant	HG4_PB_SVrefine2PBcRDovetail_4591.jpeg	Hom_Var	5+	90-100	concordant	concordant	v0.6_Call	INS 8:21624306-21626582	INS	1000-5999	Hom_Var
HG2_PB_SVrefine2PB10Xhap12_3447	4	133	Insertion	100032565	100032698	297	Hom_Var	8	8	1	100	5+	90-100	Hom_Var	13	15	0.866667	86.6667	Threshold2	Hom_Var	Hom_Var	11	12	0.916667	91.6667	concordant	HG2_PB_SVrefine2PB10Xhap12_3447.jpeg	Hom_Var	5+	90-100	concordant	concordant	v0.6_Call	INS 4:100032565-100032698	INS	100-300	Hom_Var
HG2_Ill_GATKHCSBGrefine_7025	9	112	Insertion	79154484	79154596	302	Hom_Var	8	8	1	100	5+	90-100	Hom_Var	11	14	0.785714	78.5714	Threshold2	Hom_Var	Hom_Var	11	12	0.916667	91.6667	concordant	HG2_Ill_GATKHCSBGrefine_7025.jpeg	Hom_Var	5+	90-100	concordant	concordant	v0.6_Call	INS 9:79154484-79154596	INS	100-300	Hom_Var
HG2_PB_HySA_22298	11	143	Insertion	44963574	44963717	671	Hom_Var	7	7	1	100	5+	90-100	Hom_Var	13	14	0.928571	92.8571	Threshold2	Hom_Var	Hom_Var	11	12	0.916667	91.6667	concordant	HG2_PB_HySA_22298.jpeg	Hom_Var	5+	90-100	concordant	concordant	v0.6_Call	INS 11:44963574-44963717	INS	100-300	Hom_Var
HG4_Ill_scalpel_11342	11	177	Insertion	56793259	56793436	1063	Hom_Var	9	9	1	100	5+	90-100	Hom_Var	12	13	0.923077	92.3077	Threshold2	Hom_Var	Hom_Var	11	12	0.916667	91.6667	concordant	HG4_Ill_scalpel_11342.jpeg	Hom_Var	5+	90-100	concordant	concordant	v0.6_Call	INS 11:56793259-56793436	INS	100-300	Hom_Var
HG4_Ill_GATKHCSBGrefine_7725	10	364	Insertion	32320796	32321160	660	Het_Var	8	8	1	100	5+	90-100	Het_Var	12	15	0.8	80	Threshold2	Het_Var	Het_Var	12	13	0.923077	92.3077	concordant	HG4_Ill_GATKHCSBGrefine_7725.jpeg	Het_Var	5+	90-100	concordant	concordant	v0.6_Call	INS 10:32320796-32321160	INS	300-400	Het_Var
HG3_PB_assemblyticsfalcon_9002	15	305	Insertion	73983312	73983617	704	Hom_Var	9	9	1	100	5+	90-100	Hom_Var	12	14	0.857143	85.7143	Threshold2	Hom_Var	Hom_Var	12	13	0.923077	92.3077	concordant	HG3_PB_assemblyticsfalcon_9002.jpeg	Hom_Var	5+	90-100	concordant	concordant	v0.6_Call	INS 15:73983312-73983617	INS	300-400	Hom_Var
HG3_Ill_Spiral_6945	5	20	Insertion	159104641	159104661	419	Het_Var	7	7	1	100	5+	90-100	Het_Var	14	15	0.933333	93.3333	Threshold2	Het_Var	Het_Var	12	13	0.923077	92.3077	concordant	HG3_Ill_Spiral_6945.jpeg	Het_Var	5+	90-100	concordant	concordant	v0.6_Call	INS 5:159104641-159104661	INS	20-50	Het_Var
HG4_PB_assemblyticsfalcon_22456	6	20	Insertion	51979532	51979552	986	Het_Var	9	10	0.9	90	5+	80-90	Het_Var	13	14	0.928571	92.8571	Threshold2	Het_Var	Het_Var	12	13	0.923077	92.3077	concordant	HG4_PB_assemblyticsfalcon_22456.jpeg	Het_Var	5+	90-100	concordant	concordant	v0.6_Call	INS 6:51979532-51979552	INS	20-50	Het_Var
HG3_Ill_GATKHC_24907	16	34	Insertion	468150	468184	265	Hom_Var	10	10	1	100	5+	90-100	Hom_Var	13	14	0.928571	92.8571	Threshold2	Hom_Var	Hom_Var	12	13	0.923077	92.3077	concordant	HG3_Ill_GATKHC_24907.jpeg	Hom_Var	5+	90-100	concordant	concordant	v0.6_Call	INS 16:468150-468184	INS	20-50	Hom_Var
HG2_Ill_GATKHC_7840	4	26	Insertion	89153046	89153072	747	Hom_Var	8	8	1	100	5+	90-100	Hom_Var	12	13	0.923077	92.3077	Threshold2	Hom_Var	Hom_Var	12	13	0.923077	92.3077	concordant	HG2_Ill_GATKHC_7840.jpeg	Hom_Var	5+	90-100	concordant	concordant	v0.6_Call	INS 4:89153046-89153072	INS	20-50	Hom_Var
HG2_PB_SVrefine2Falcon1plusDovetail_1671	11	1243	Insertion	995694	996937	1227	Hom_Var	7	7	1	100	5+	90-100	Hom_Var	12	13	0.923077	92.3077	Threshold2	Hom_Var	Hom_Var	12	13	0.923077	92.3077	concordant	HG2_PB_SVrefine2Falcon1plusDovetail_1671.jpeg	Hom_Var	5+	90-100	concordant	concordant	v0.6_Call	INS 11:995694-996937	INS	1000-5999	Hom_Var
HG2_PB_SVrefine2PB10Xhap12_5205	6	98	Insertion	97087579	97087677	696	Hom_Var	10	10	1	100	5+	90-100	Hom_Var	14	16	0.875	87.5	Threshold2	Hom_Var	Hom_Var	13	14	0.928571	92.8571	concordant	HG2_PB_SVrefine2PB10Xhap12_5205.jpeg	Hom_Var	5+	90-100	concordant	concordant	v0.6_Call	INS 6:97087579-97087677	INS	50-100	Hom_Var
HG2_Ill_MetaSV_1564	15	413	Insertion	23707579	23707992	903	Hom_Var	8	8	1	100	5+	90-100	Hom_Var	14	16	0.875	87.5	Threshold2	Hom_Var	Hom_Var	13	14	0.928571	92.8571	concordant	HG2_Ill_MetaSV_1564.jpeg	Hom_Var	5+	90-100	concordant	concordant	v0.6_Call	INS 15:23707579-23707992	INS	400-1000	Hom_Var
HG2_Ill_MetaSV_1734	16	734	Insertion	483137	483871	1058	Hom_Var	10	11	0.909091	90.9091	5+	90-100	Hom_Var	15	16	0.9375	93.75	Threshold2	Hom_Var	Hom_Var	13	14	0.928571	92.8571	concordant	HG2_Ill_MetaSV_1734.jpeg	Hom_Var	5+	90-100	concordant	concordant	v0.6_Call	INS 16:483137-483871	INS	400-1000	Hom_Var
HG3_Ill_Spiral_12891	11	26	Insertion	65594117	65594143	619	Het_Var	11	11	1	100	5+	90-100	Het_Var	13	14	0.928571	92.8571	Threshold2	Het_Var	Het_Var	13	14	0.928571	92.8571	concordant	HG3_Ill_Spiral_12891.jpeg	Het_Var	5+	90-100	concordant	concordant	v0.6_Call	INS 11:65594117-65594143	INS	20-50	Het_Var
HG4_Ill_GATKHCSBGrefine_7166	9	50	Insertion	81195339	81195389	517	Hom_Var	8	8	1	100	5+	90-100	Hom_Var	16	17	0.941176	94.1176	Threshold2	Hom_Var	Hom_Var	13	14	0.928571	92.8571	concordant	HG4_Ill_GATKHCSBGrefine_7166.jpeg	Hom_Var	5+	90-100	concordant	concordant	v0.6_Call	INS 9:81195339-81195389	INS	20-50	Hom_Var
HG3_PB_assemblyticsfalcon_27402	9	1391	Insertion	13424327	13425718	332	Het_Var	9	9	1	100	5+	90-100	Het_Var	14	17	0.823529	82.3529	Threshold2	Het_Var	Het_Var	14	15	0.933333	93.3333	concordant	HG3_PB_assemblyticsfalcon_27402.jpeg	Het_Var	5+	90-100	concordant	concordant	v0.6_Call	INS 9:13424327-13425718	INS	1000-5999	Het_Var
HG3_PB_SVrefine2PBcRDovetail_354	1	3705	Insertion	75192889	75196594	397	Het_Var	10	10	1	100	5+	90-100	Het_Var	14	16	0.875	87.5	Threshold2	Het_Var	Het_Var	14	15	0.933333	93.3333	concordant	HG3_PB_SVrefine2PBcRDovetail_354.jpeg	Het_Var	5+	90-100	concordant	concordant	v0.6_Call	INS 1:75192889-75196594	INS	1000-5999	Het_Var
HG4_PB_pbsv_7443	6	64	Insertion	158523539	158523603	158	Het_Var	10	10	1	100	5+	90-100	Het_Var	16	17	0.941176	94.1176	Threshold2	Het_Var	Het_Var	15	16	0.9375	93.75	concordant	HG4_PB_pbsv_7443.jpeg	Het_Var	5+	90-100	concordant	concordant	v0.6_Call	INS 6:158523539-158523603	INS	50-100	Het_Var
HG2_10X_SVrefine210Xhap12_969	1	304	Insertion	231085150	231085454	23	Het_Var	14	15	0.933333	93.3333	5+	90-100	Het_Var	25	29	0.862069	86.2069	Threshold2	Het_Var	Het_Var	22	23	0.956522	95.6522	concordant	HG2_10X_SVrefine210Xhap12_969.jpeg	Het_Var	5+	90-100	concordant	concordant	v0.6_Call	INS 1:231085150-231085454	INS	300-400	Het_Var
HG2_Ill_SVrefine2DISCOVARplusDovetail_9033	3	6725	Insertion	175100375	175107100	45	Het_Var	7	7	1	100	5+	90-100	Het_Var	8	9	0.888889	88.8889	Threshold2	Het_Var	Het_Var	8	8	1	100	concordant	HG2_Ill_SVrefine2DISCOVARplusDovetail_9033.jpeg	Het_Var	5+	90-100	concordant	concordant	v0.6_Call	INS 3:175100375-175107100	INS	6000+	Het_Var
HG3_PB_assemblyticsfalcon_13947	2	6149	Insertion	116695720	116701869	421	Het_Var	7	7	1	100	5+	90-100	Het_Var	13	14	0.928571	92.8571	Threshold2	Het_Var	Het_Var	12	12	1	100	concordant	HG3_PB_assemblyticsfalcon_13947.jpeg	Het_Var	5+	90-100	concordant	concordant	v0.6_Call	INS 2:116695720-116701869	INS	6000+	Het_Var
HG4_PB_SVrefine2PBcRDovetail_3069	5	6139	Insertion	126771837	126777976	597	Het_Var	3	3	1	100	2018-03-04	90-100	Het_Var	5	6	0.833333	83.3333	Threshold2	Het_Var	Het_Var	5	5	1	100	concordant	HG4_PB_SVrefine2PBcRDovetail_3069.jpeg	Het_Var	5+	90-100	concordant	concordant	v0.6_Call	INS 5:126771837-126777976	INS	6000+	Het_Var
HG2_PB_SVrefine2Falcon2Bionano_850	2	6161	Insertion	116695720	116701881	838	Het_Var	9	9	1	100	5+	90-100	Het_Var	12	12	1	100	Threshold2	Het_Var	Het_Var	12	12	1	100	concordant	HG2_PB_SVrefine2Falcon2Bionano_850.jpeg	Het_Var	5+	90-100	concordant	concordant	v0.6_Call	INS 2:116695720-116701881	INS	6000+	Het_Var
HG2_PB_SVrefine2PBcRplusDovetail_7572	3	6050	Insertion	123590712	123596762	904	Het_Var	3	3	1	100	2018-03-04	90-100	Het_Var	7	10	0.7	70	Threshold2	Het_Var	Het_Var	7	7	1	100	concordant	HG2_PB_SVrefine2PBcRplusDovetail_7572.jpeg	Het_Var	5+	90-100	concordant	concordant	v0.6_Call	INS 3:123590712-123596762	INS	6000+	Het_Var
HG2_PB_PB10Xdip_21201	4	6050	Insertion	10632678	10638728	1138	Het_Var	6	6	1	100	5+	90-100	Het_Var	9	9	1	100	Threshold2	Het_Var	Het_Var	9	9	1	100	concordant	HG2_PB_PB10Xdip_21201.jpeg	Het_Var	5+	90-100	concordant	concordant	v0.6_Call	INS 4:10632678-10638728	INS	6000+	Het_Var
HG4_PB_SVrefine2Falcon1Dovetail_2242	3	6076	Insertion	143121758	143127834	1286	Het_Var	4	4	1	100	2018-03-04	90-100	Het_Var	7	8	0.875	87.5	Threshold2	Het_Var	Het_Var	7	7	1	100	concordant	HG4_PB_SVrefine2Falcon1Dovetail_2242.jpeg	Het_Var	5+	90-100	concordant	concordant	v0.6_Call	INS 3:143121758-143127834	INS	6000+	Het_Var
HG2_10X_SVrefine210Xhap12_5264	6	6033	Insertion	142450100	142456133	1021	Hom_Var	7	7	1	100	5+	90-100	Hom_Var	10	11	0.909091	90.9091	Threshold2	Hom_Var	Hom_Var	9	9	1	100	concordant	HG2_10X_SVrefine210Xhap12_5264.jpeg	Hom_Var	5+	90-100	concordant	concordant	v0.6_Call	INS 6:142450100-142456133	INS	6000+	Hom_Var
HG3_PB_SVrefine2PBcRDovetail_2051	4	97	Insertion	58976319	58976416	113	Het_Var	7	7	1	100	5+	90-100	Het_Var	13	14	0.928571	92.8571	Threshold2	Het_Var	Het_Var	11	11	1	100	concordant	HG3_PB_SVrefine2PBcRDovetail_2051.jpeg	Het_Var	5+	90-100	concordant	concordant	v0.6_Call	INS 4:58976319-58976416	INS	50-100	Het_Var
HG4_Ill_manta_1626	6	90	Insertion	3402651	3402741	126	Het_Var	8	8	1	100	5+	90-100	Het_Var	15	15	1	100	Threshold2	Het_Var	Het_Var	13	13	1	100	concordant	HG4_Ill_manta_1626.jpeg	Het_Var	5+	90-100	concordant	concordant	v0.6_Call	INS 6:3402651-3402741	INS	50-100	Het_Var
HG2_Ill_250bpfermikitraw_227	1	56	Insertion	18607617	18607673	217	Het_Var	8	8	1	100	5+	90-100	Het_Var	12	12	1	100	Threshold2	Het_Var	Het_Var	11	11	1	100	concordant	HG2_Ill_250bpfermikitraw_227.jpeg	Het_Var	5+	90-100	concordant	concordant	v0.6_Call	INS 1:18607617-18607673	INS	50-100	Het_Var
HG2_PB_HySA_2321	1	76	Insertion	222263522	222263598	236	Het_Var	7	7	1	100	5+	90-100	Het_Var	13	15	0.866667	86.6667	Threshold2	Het_Var	Het_Var	13	13	1	100	concordant	HG2_PB_HySA_2321.jpeg	Het_Var	5+	90-100	concordant	concordant	v0.6_Call	INS 1:222263522-222263598	INS	50-100	Het_Var
HG3_Ill_GATKHCSBGrefine_1438	2	75	Insertion	118799997	118800072	485	Het_Var	8	8	1	100	5+	90-100	Het_Var	12	12	1	100	Threshold2	Het_Var	Het_Var	11	11	1	100	concordant	HG3_Ill_GATKHCSBGrefine_1438.jpeg	Het_Var	5+	90-100	concordant	concordant	v0.6_Call	INS 2:118799997-118800072	INS	50-100	Het_Var
HG4_Ill_svaba_5928	4	66	Insertion	65855612	65855678	623	Het_Var	8	8	1	100	5+	90-100	Het_Var	16	17	0.941176	94.1176	Threshold2	Het_Var	Het_Var	13	13	1	100	concordant	HG4_Ill_svaba_5928.jpeg	Het_Var	5+	90-100	concordant	concordant	v0.6_Call	INS 4:65855612-65855678	INS	50-100	Het_Var
HG4_PB_HySA_2952	2	62	Insertion	77316365	77316427	689	Het_Var	7	7	1	100	5+	90-100	Het_Var	11	12	0.916667	91.6667	Threshold2	Het_Var	Het_Var	11	11	1	100	concordant	HG4_PB_HySA_2952.jpeg	Het_Var	5+	90-100	concordant	concordant	v0.6_Call	INS 2:77316365-77316427	INS	50-100	Het_Var
HG2_Ill_GATKHCSBGrefine_9616	13	74	Insertion	108768402	108768476	706	Het_Var	7	7	1	100	5+	90-100	Het_Var	13	13	1	100	Threshold2	Het_Var	Het_Var	11	11	1	100	concordant	HG2_Ill_GATKHCSBGrefine_9616.jpeg	Het_Var	5+	90-100	concordant	concordant	v0.6_Call	INS 13:108768402-108768476	INS	50-100	Het_Var
HG2_Ill_svaba_2611	2	52	Insertion	113842556	113842608	764	Het_Var	7	7	1	100	5+	90-100	Het_Var	9	9	1	100	Threshold2	Het_Var	Het_Var	9	9	1	100	concordant	HG2_Ill_svaba_2611.jpeg	Het_Var	5+	90-100	concordant	concordant	v0.6_Call	INS 2:113842556-113842608	INS	50-100	Het_Var
HG2_Ill_GATKHC_14331	7	55	Insertion	150039582	150039637	796	Het_Var	9	9	1	100	5+	90-100	Het_Var	13	13	1	100	Threshold2	Het_Var	Het_Var	13	13	1	100	concordant	HG2_Ill_GATKHC_14331.jpeg	Het_Var	5+	90-100	concordant	concordant	v0.6_Call	INS 7:150039582-150039637	INS	50-100	Het_Var
HG4_Ill_svaba_3893	3	90	Insertion	18821509	18821599	831	Het_Var	8	8	1	100	5+	90-100	Het_Var	11	11	1	100	Threshold2	Het_Var	Het_Var	10	10	1	100	concordant	HG4_Ill_svaba_3893.jpeg	Het_Var	5+	90-100	concordant	concordant	v0.6_Call	INS 3:18821509-18821599	INS	50-100	Het_Var
HG2_Ill_Cortex_7351	5	74	Insertion	161748165	161748239	257	Hom_Var	7	7	1	100	5+	90-100	Hom_Var	11	12	0.916667	91.6667	Threshold2	Hom_Var	Hom_Var	10	10	1	100	concordant	HG2_Ill_Cortex_7351.jpeg	Hom_Var	5+	90-100	concordant	concordant	v0.6_Call	INS 5:161748165-161748239	INS	50-100	Hom_Var
HG3_Ill_Spiral_11674	10	55	Insertion	32936398	32936453	525	Hom_Var	10	10	1	100	5+	90-100	Hom_Var	15	15	1	100	Threshold2	Hom_Var	Hom_Var	13	13	1	100	concordant	HG3_Ill_Spiral_11674.jpeg	Hom_Var	5+	90-100	concordant	concordant	v0.6_Call	INS 10:32936398-32936453	INS	50-100	Hom_Var
HG2_PB_pbsv_3991	3	684	Insertion	195487537	195488221	1170	Het_Var	3	3	1	100	2018-03-04	90-100	Het_Var	7	8	0.875	87.5	Threshold2	Het_Var	Het_Var	7	7	1	100	concordant	HG2_PB_pbsv_3991.jpeg	Het_Var	5+	90-100	concordant	concordant	v0.6_Call	INS 3:195487537-195488221	INS	400-1000	Het_Var
HG2_Ill_breakscan11_4703	17	618	Insertion	3802539	3803157	444	Hom_Var	7	7	1	100	5+	90-100	Hom_Var	13	13	1	100	Threshold2	Hom_Var	Hom_Var	11	11	1	100	concordant	HG2_Ill_breakscan11_4703.jpeg	Hom_Var	5+	90-100	concordant	concordant	v0.6_Call	INS 17:3802539-3803157	INS	400-1000	Hom_Var
HG3_PB_pbsv_12344	11	552	Insertion	107984062	107984614	940	Hom_Var	9	9	1	100	5+	90-100	Hom_Var	14	14	1	100	Threshold2	Hom_Var	Hom_Var	14	14	1	100	concordant	HG3_PB_pbsv_12344.jpeg	Hom_Var	5+	90-100	concordant	concordant	v0.6_Call	INS 11:107984062-107984614	INS	400-1000	Hom_Var
HG3_PB_HySA_9155	5	657	Insertion	84239613	84240270	995	Hom_Var	7	7	1	100	5+	90-100	Hom_Var	14	15	0.933333	93.3333	Threshold2	Hom_Var	Hom_Var	12	12	1	100	concordant	HG3_PB_HySA_9155.jpeg	Hom_Var	5+	90-100	concordant	concordant	v0.6_Call	INS 5:84239613-84240270	INS	400-1000	Hom_Var
HG2_PB_SVrefine2PB10Xhap12_2241	3	702	Insertion	9341836	9342538	1024	Hom_Var	8	8	1	100	5+	90-100	Hom_Var	14	15	0.933333	93.3333	Threshold2	Hom_Var	Hom_Var	13	13	1	100	concordant	HG2_PB_SVrefine2PB10Xhap12_2241.jpeg	Hom_Var	5+	90-100	concordant	concordant	v0.6_Call	INS 3:9341836-9342538	INS	400-1000	Hom_Var
HG3_PB_SVrefine2Falcon1Dovetail_4514	6	441	Insertion	166162641	166163082	1241	Hom_Var	7	7	1	100	5+	90-100	Hom_Var	12	14	0.857143	85.7143	Threshold2	Hom_Var	Hom_Var	11	11	1	100	concordant	HG3_PB_SVrefine2Falcon1Dovetail_4514.jpeg	Hom_Var	5+	90-100	concordant	concordant	v0.6_Call	INS 6:166162641-166163082	INS	400-1000	Hom_Var
HG4_Ill_GATKHCSBGrefine_6829	8	327	Insertion	132942711	132943038	82	Het_Var	5	5	1	100	5+	90-100	Het_Var	11	12	0.916667	91.6667	Threshold2	Het_Var	Het_Var	10	10	1	100	concordant	HG4_Ill_GATKHCSBGrefine_6829.jpeg	Het_Var	5+	90-100	concordant	concordant	v0.6_Call	INS 8:132942711-132943038	INS	300-400	Het_Var
HG4_PB_pbsv_2427	2	325	Insertion	163678632	163678957	86	Het_Var	10	10	1	100	5+	90-100	Het_Var	17	18	0.944444	94.4444	Threshold2	Het_Var	Het_Var	15	15	1	100	concordant	HG4_PB_pbsv_2427.jpeg	Het_Var	5+	90-100	concordant	concordant	v0.6_Call	INS 2:163678632-163678957	INS	300-400	Het_Var
HG4_PB_pbsv_14290	13	302	Insertion	93629630	93629932	152	Het_Var	5	5	1	100	5+	90-100	Het_Var	9	10	0.9	90	Threshold2	Het_Var	Het_Var	9	9	1	100	concordant	HG4_PB_pbsv_14290.jpeg	Het_Var	5+	90-100	concordant	concordant	v0.6_Call	INS 13:93629630-93629932	INS	300-400	Het_Var
HG2_PB_HySA_6600	3	302	Insertion	95874520	95874822	159	Het_Var	7	7	1	100	5+	90-100	Het_Var	12	13	0.923077	92.3077	Threshold2	Het_Var	Het_Var	11	11	1	100	concordant	HG2_PB_HySA_6600.jpeg	Het_Var	5+	90-100	concordant	concordant	v0.6_Call	INS 3:95874520-95874822	INS	300-400	Het_Var
HG2_PB_HySA_29091	16	328	Insertion	23865287	23865615	164	Het_Var	10	10	1	100	5+	90-100	Het_Var	15	16	0.9375	93.75	Threshold2	Het_Var	Het_Var	14	14	1	100	concordant	HG2_PB_HySA_29091.jpeg	Het_Var	5+	90-100	concordant	concordant	v0.6_Call	INS 16:23865287-23865615	INS	300-400	Het_Var
HG2_PB_HySA_1086	1	337	Insertion	77577913	77578250	253	Het_Var	5	5	1	100	5+	90-100	Het_Var	9	10	0.9	90	Threshold2	Het_Var	Het_Var	9	9	1	100	concordant	HG2_PB_HySA_1086.jpeg	Het_Var	5+	90-100	concordant	concordant	v0.6_Call	INS 1:77577913-77578250	INS	300-400	Het_Var
HG2_PB_pbsv_9401	8	320	Insertion	42039903	42040223	293	Het_Var	7	7	1	100	5+	90-100	Het_Var	13	13	1	100	Threshold2	Het_Var	Het_Var	11	11	1	100	concordant	HG2_PB_pbsv_9401.jpeg	Het_Var	5+	90-100	concordant	concordant	v0.6_Call	INS 8:42039903-42040223	INS	300-400	Het_Var
HG2_PB_pbsv_15598	15	362	Insertion	86355624	86355986	373	Het_Var	6	6	1	100	5+	90-100	Het_Var	10	11	0.909091	90.9091	Threshold2	Het_Var	Het_Var	10	10	1	100	concordant	HG2_PB_pbsv_15598.jpeg	Het_Var	5+	90-100	concordant	concordant	v0.6_Call	INS 15:86355624-86355986	INS	300-400	Het_Var
HG4_PB_pbsv_3137	3	325	Insertion	26248695	26249020	433	Het_Var	8	8	1	100	5+	90-100	Het_Var	12	12	1	100	Threshold2	Het_Var	Het_Var	11	11	1	100	concordant	HG4_PB_pbsv_3137.jpeg	Het_Var	5+	90-100	concordant	concordant	v0.6_Call	INS 3:26248695-26249020	INS	300-400	Het_Var
HG2_PB_PB10Xdip_3324	10	305	Insertion	14396683	14396988	558	Het_Var	8	8	1	100	5+	90-100	Het_Var	13	13	1	100	Threshold2	Het_Var	Het_Var	13	13	1	100	concordant	HG2_PB_PB10Xdip_3324.jpeg	Het_Var	5+	90-100	concordant	concordant	v0.6_Call	INS 10:14396683-14396988	INS	300-400	Het_Var
HG3_PB_SVrefine2Falcon1Dovetail_6686	10	330	Insertion	9904392	9904722	651	Het_Var	8	8	1	100	5+	90-100	Het_Var	11	12	0.916667	91.6667	Threshold2	Het_Var	Het_Var	11	11	1	100	concordant	HG3_PB_SVrefine2Falcon1Dovetail_6686.jpeg	Het_Var	5+	90-100	concordant	concordant	v0.6_Call	INS 10:9904392-9904722	INS	300-400	Het_Var
HG3_PB_SVrefine2PBcRDovetail_580	1	305	Insertion	190874444	190874749	686	Het_Var	9	9	1	100	5+	90-100	Het_Var	14	14	1	100	Threshold2	Het_Var	Het_Var	13	13	1	100	concordant	HG3_PB_SVrefine2PBcRDovetail_580.jpeg	Het_Var	5+	90-100	concordant	concordant	v0.6_Call	INS 1:190874444-190874749	INS	300-400	Het_Var
HG4_PB_pbsv_3651	3	341	Insertion	127015544	127015885	701	Het_Var	6	6	1	100	5+	90-100	Het_Var	10	10	1	100	Threshold2	Het_Var	Het_Var	9	9	1	100	concordant	HG4_PB_pbsv_3651.jpeg	Het_Var	5+	90-100	concordant	concordant	v0.6_Call	INS 3:127015544-127015885	INS	300-400	Het_Var
HG2_PB_HySA_27109	14	342	Insertion	63226291	63226633	705	Het_Var	7	7	1	100	5+	90-100	Het_Var	13	14	0.928571	92.8571	Threshold2	Het_Var	Het_Var	13	13	1	100	concordant	HG2_PB_HySA_27109.jpeg	Het_Var	5+	90-100	concordant	concordant	v0.6_Call	INS 14:63226291-63226633	INS	300-400	Het_Var
HG2_Ill_MetaSV_4411	6	315	Insertion	93576134	93576449	772	Het_Var	8	8	1	100	5+	90-100	Het_Var	15	15	1	100	Threshold2	Het_Var	Het_Var	14	14	1	100	concordant	HG2_Ill_MetaSV_4411.jpeg	Het_Var	5+	90-100	concordant	concordant	v0.6_Call	INS 6:93576134-93576449	INS	300-400	Het_Var
HG3_PB_SVrefine2Falcon1Dovetail_1922	3	335	Insertion	19035438	19035773	818	Het_Var	8	8	1	100	5+	90-100	Het_Var	11	12	0.916667	91.6667	Threshold2	Het_Var	Het_Var	11	11	1	100	concordant	HG3_PB_SVrefine2Falcon1Dovetail_1922.jpeg	Het_Var	5+	90-100	concordant	concordant	v0.6_Call	INS 3:19035438-19035773	INS	300-400	Het_Var
HG2_PB_SVrefine2PB10Xhap12_2735	3	322	Insertion	149142375	149142697	969	Het_Var	7	7	1	100	5+	90-100	Het_Var	14	14	1	100	Threshold2	Het_Var	Het_Var	12	12	1	100	concordant	HG2_PB_SVrefine2PB10Xhap12_2735.jpeg	Het_Var	5+	90-100	concordant	concordant	v0.6_Call	INS 3:149142375-149142697	INS	300-400	Het_Var
HG4_PB_assemblyticsfalcon_409	1	382	Insertion	30346049	30346431	1065	Het_Var	7	7	1	100	5+	90-100	Het_Var	13	13	1	100	Threshold2	Het_Var	Het_Var	11	11	1	100	concordant	HG4_PB_assemblyticsfalcon_409.jpeg	Het_Var	5+	90-100	concordant	concordant	v0.6_Call	INS 1:30346049-30346431	INS	300-400	Het_Var
HG4_PB_SVrefine2Falcon1Dovetail_1190	2	314	Insertion	75387890	75388204	1122	Het_Var	5	5	1	100	5+	90-100	Het_Var	10	10	1	100	Threshold2	Het_Var	Het_Var	10	10	1	100	concordant	HG4_PB_SVrefine2Falcon1Dovetail_1190.jpeg	Het_Var	5+	90-100	concordant	concordant	v0.6_Call	INS 2:75387890-75388204	INS	300-400	Het_Var
HG2_PB_SVrefine2Falcon1plusDovetail_6604	2	332	Insertion	212925312	212925644	1147	Het_Var	8	8	1	100	5+	90-100	Het_Var	14	14	1	100	Threshold2	Het_Var	Het_Var	13	13	1	100	concordant	HG2_PB_SVrefine2Falcon1plusDovetail_6604.jpeg	Het_Var	5+	90-100	concordant	concordant	v0.6_Call	INS 2:212925312-212925644	INS	300-400	Het_Var
HG4_PB_assemblyticsfalcon_17208	3	303	Insertion	53499999	53500302	1163	Het_Var	8	8	1	100	5+	90-100	Het_Var	11	12	0.916667	91.6667	Threshold2	Het_Var	Het_Var	11	11	1	100	concordant	HG4_PB_assemblyticsfalcon_17208.jpeg	Het_Var	5+	90-100	concordant	concordant	v0.6_Call	INS 3:53499999-53500302	INS	300-400	Het_Var
HG3_PB_assemblyticsfalcon_14781	2	306	Insertion	219198675	219198981	1237	Het_Var	9	9	1	100	5+	90-100	Het_Var	15	16	0.9375	93.75	Threshold2	Het_Var	Het_Var	14	14	1	100	concordant	HG3_PB_assemblyticsfalcon_14781.jpeg	Het_Var	5+	90-100	concordant	concordant	v0.6_Call	INS 2:219198675-219198981	INS	300-400	Het_Var
HG3_PB_SVrefine2Falcon1Dovetail_774	1	303	Insertion	231085150	231085453	1256	Het_Var	9	9	1	100	5+	90-100	Het_Var	14	14	1	100	Threshold2	Het_Var	Het_Var	13	13	1	100	concordant	HG3_PB_SVrefine2Falcon1Dovetail_774.jpeg	Het_Var	5+	90-100	concordant	concordant	v0.6_Call	INS 1:231085150-231085453	INS	300-400	Het_Var
HG3_Ill_SVrefine2DISCOVARDovetail_9359	11	320	Insertion	134305643	134305963	148	Hom_Var	6	6	1	100	5+	90-100	Hom_Var	10	11	0.909091	90.9091	Threshold2	Hom_Var	Hom_Var	10	10	1	100	concordant	HG3_Ill_SVrefine2DISCOVARDovetail_9359.jpeg	Hom_Var	5+	90-100	concordant	concordant	v0.6_Call	INS 11:134305643-134305963	INS	300-400	Hom_Var
HG2_PB_HySA_27450	14	340	Insertion	98494372	98494712	180	Hom_Var	9	9	1	100	5+	90-100	Hom_Var	12	13	0.923077	92.3077	Threshold2	Hom_Var	Hom_Var	12	12	1	100	concordant	HG2_PB_HySA_27450.jpeg	Hom_Var	5+	90-100	concordant	concordant	v0.6_Call	INS 14:98494372-98494712	INS	300-400	Hom_Var
HG2_Ill_breakscan11_3243	2	314	Insertion	195578279	195578593	203	Hom_Var	8	8	1	100	5+	90-100	Hom_Var	17	17	1	100	Threshold2	Hom_Var	Hom_Var	15	15	1	100	concordant	HG2_Ill_breakscan11_3243.jpeg	Hom_Var	5+	90-100	concordant	concordant	v0.6_Call	INS 2:195578279-195578593	INS	300-400	Hom_Var
HG3_PB_pbsv_6404	6	315	Insertion	13718476	13718791	430	Hom_Var	7	7	1	100	5+	90-100	Hom_Var	13	13	1	100	Threshold2	Hom_Var	Hom_Var	12	12	1	100	concordant	HG3_PB_pbsv_6404.jpeg	Hom_Var	5+	90-100	concordant	concordant	v0.6_Call	INS 6:13718476-13718791	INS	300-400	Hom_Var
HG2_PB_SVrefine2Falcon2Bionano_7353	14	308	Insertion	31444296	31444604	458	Hom_Var	7	7	1	100	5+	90-100	Hom_Var	11	11	1	100	Threshold2	Hom_Var	Hom_Var	11	11	1	100	concordant	HG2_PB_SVrefine2Falcon2Bionano_7353.jpeg	Hom_Var	5+	90-100	concordant	concordant	v0.6_Call	INS 14:31444296-31444604	INS	300-400	Hom_Var
HG3_Ill_manta_3482	15	381	Insertion	70577522	70577903	518	Hom_Var	7	7	1	100	5+	90-100	Hom_Var	14	14	1	100	Threshold2	Hom_Var	Hom_Var	13	13	1	100	concordant	HG3_Ill_manta_3482.jpeg	Hom_Var	5+	90-100	concordant	concordant	v0.6_Call	INS 15:70577522-70577903	INS	300-400	Hom_Var
HG2_Ill_GATKHCSBGrefine_3252	4	314	Insertion	114018249	114018563	549	Hom_Var	9	9	1	100	5+	90-100	Hom_Var	13	13	1	100	Threshold2	Hom_Var	Hom_Var	13	13	1	100	concordant	HG2_Ill_GATKHCSBGrefine_3252.jpeg	Hom_Var	5+	90-100	concordant	concordant	v0.6_Call	INS 4:114018249-114018563	INS	300-400	Hom_Var
HG4_PB_SVrefine2PBcRDovetail_4971	8	369	Insertion	143342329	143342698	657	Hom_Var	4	4	1	100	2018-03-04	90-100	Hom_Var	10	10	1	100	Threshold2	Hom_Var	Hom_Var	9	9	1	100	concordant	HG4_PB_SVrefine2PBcRDovetail_4971.jpeg	Hom_Var	5+	90-100	concordant	concordant	v0.6_Call	INS 8:143342329-143342698	INS	300-400	Hom_Var
HG2_PB_pbsv_6811	6	393	Insertion	40622961	40623354	684	Hom_Var	3	3	1	100	2018-03-04	90-100	Hom_Var	6	7	0.857143	85.7143	Threshold2	Hom_Var	Hom_Var	6	6	1	100	concordant	HG2_PB_pbsv_6811.jpeg	Hom_Var	5+	90-100	concordant	concordant	v0.6_Call	INS 6:40622961-40623354	INS	300-400	Hom_Var
HG2_PB_PB10Xdip_2809	1	317	Insertion	9230435	9230752	976	Hom_Var	4	4	1	100	2018-03-04	90-100	Hom_Var	9	9	1	100	Threshold2	Hom_Var	Hom_Var	7	7	1	100	concordant	HG2_PB_PB10Xdip_2809.jpeg	Hom_Var	5+	90-100	concordant	concordant	v0.6_Call	INS 1:9230435-9230752	INS	300-400	Hom_Var
HG3_Ill_GATKHCSBGrefine_348	1	307	Insertion	79582075	79582382	1188	Hom_Var	5	5	1	100	5+	90-100	Hom_Var	9	9	1	100	Threshold2	Hom_Var	Hom_Var	9	9	1	100	concordant	HG3_Ill_GATKHCSBGrefine_348.jpeg	Hom_Var	5+	90-100	concordant	concordant	v0.6_Call	INS 1:79582075-79582382	INS	300-400	Hom_Var
HG2_Ill_Krunchall_20062	14	27	Insertion	53454232	53454259	218	Het_Var	9	9	1	100	5+	90-100	Het_Var	13	13	1	100	Threshold2	Het_Var	Het_Var	11	11	1	100	concordant	HG2_Ill_Krunchall_20062.jpeg	Het_Var	5+	90-100	concordant	concordant	v0.6_Call	INS 14:53454232-53454259	INS	20-50	Het_Var
HG2_Ill_250bpfermikitraw_9327	6	25	Insertion	22534187	22534212	324	Het_Var	9	9	1	100	5+	90-100	Het_Var	14	16	0.875	87.5	Threshold2	Het_Var	Het_Var	12	12	1	100	concordant	HG2_Ill_250bpfermikitraw_9327.jpeg	Het_Var	5+	90-100	concordant	concordant	v0.6_Call	INS 6:22534187-22534212	INS	20-50	Het_Var
HG3_Ill_GATKHC_3005	2	40	Insertion	46523798	46523838	519	Het_Var	8	8	1	100	5+	90-100	Het_Var	14	14	1	100	Threshold2	Het_Var	Het_Var	13	13	1	100	concordant	HG3_Ill_GATKHC_3005.jpeg	Het_Var	5+	90-100	concordant	concordant	v0.6_Call	INS 2:46523798-46523838	INS	20-50	Het_Var
HG2_Ill_scalpel_10479	10	50	Insertion	21346518	21346568	523	Het_Var	8	8	1	100	5+	90-100	Het_Var	15	15	1	100	Threshold2	Het_Var	Het_Var	14	14	1	100	concordant	HG2_Ill_scalpel_10479.jpeg	Het_Var	5+	90-100	concordant	concordant	v0.6_Call	INS 10:21346518-21346568	INS	20-50	Het_Var
HG3_Ill_GATKHC_11548	6	36	Insertion	63842204	63842240	594	Het_Var	5	5	1	100	5+	90-100	Het_Var	8	9	0.888889	88.8889	Threshold2	Het_Var	Het_Var	8	8	1	100	concordant	HG3_Ill_GATKHC_11548.jpeg	Het_Var	5+	90-100	concordant	concordant	v0.6_Call	INS 6:63842204-63842240	INS	20-50	Het_Var
HG2_Ill_250bpfermikitraw_10402	6	39	Insertion	152857533	152857572	881	Het_Var	9	9	1	100	5+	90-100	Het_Var	14	15	0.933333	93.3333	Threshold2	Het_Var	Het_Var	14	14	1	100	concordant	HG2_Ill_250bpfermikitraw_10402.jpeg	Het_Var	5+	90-100	concordant	concordant	v0.6_Call	INS 6:152857533-152857572	INS	20-50	Het_Var
HG3_Ill_svaba_5145	3	24	Insertion	192787090	192787114	965	Het_Var	7	7	1	100	5+	90-100	Het_Var	9	9	1	100	Threshold2	Het_Var	Het_Var	9	9	1	100	concordant	HG3_Ill_svaba_5145.jpeg	Het_Var	5+	90-100	concordant	concordant	v0.6_Call	INS 3:192787090-192787114	INS	20-50	Het_Var
HG2_Ill_svaba_18702	14	22	Insertion	91683639	91683661	1037	Het_Var	7	7	1	100	5+	90-100	Het_Var	10	10	1	100	Threshold2	Het_Var	Het_Var	10	10	1	100	concordant	HG2_Ill_svaba_18702.jpeg	Het_Var	5+	90-100	concordant	concordant	v0.6_Call	INS 14:91683639-91683661	INS	20-50	Het_Var
HG2_Ill_FB_9640	10	34	Insertion	32817626	32817660	1045	Het_Var	7	7	1	100	5+	90-100	Het_Var	8	10	0.8	80	Threshold2	Het_Var	Het_Var	8	8	1	100	concordant	HG2_Ill_FB_9640.jpeg	Het_Var	5+	90-100	concordant	concordant	v0.6_Call	INS 10:32817626-32817660	INS	20-50	Het_Var
HG2_Ill_FB_8579	8	50	Insertion	125614429	125614479	1248	Het_Var	8	8	1	100	5+	90-100	Het_Var	14	14	1	100	Threshold2	Het_Var	Het_Var	13	13	1	100	concordant	HG2_Ill_FB_8579.jpeg	Het_Var	5+	90-100	concordant	concordant	v0.6_Call	INS 8:125614429-125614479	INS	20-50	Het_Var
HG2_Ill_GATKHC_25029	15	20	Insertion	102011549	102011569	1294	Het_Var	8	8	1	100	5+	90-100	Het_Var	13	13	1	100	Threshold2	Het_Var	Het_Var	13	13	1	100	concordant	HG2_Ill_GATKHC_25029.jpeg	Het_Var	5+	90-100	concordant	concordant	v0.6_Call	INS 15:102011549-102011569	INS	20-50	Het_Var
HG4_Ill_Krunchall_10418	6	26	Insertion	72287835	72287861	283	Hom_Var	8	8	1	100	5+	90-100	Hom_Var	12	12	1	100	Threshold2	Hom_Var	Hom_Var	11	11	1	100	concordant	HG4_Ill_Krunchall_10418.jpeg	Hom_Var	5+	90-100	concordant	concordant	v0.6_Call	INS 6:72287835-72287861	INS	20-50	Hom_Var
HG3_Ill_scalpel_8573	7	26	Insertion	144196662	144196688	355	Hom_Var	8	8	1	100	5+	90-100	Hom_Var	13	13	1	100	Threshold2	Hom_Var	Hom_Var	12	12	1	100	concordant	HG3_Ill_scalpel_8573.jpeg	Hom_Var	5+	90-100	concordant	concordant	v0.6_Call	INS 7:144196662-144196688	INS	20-50	Hom_Var
HG2_PB_SVrefine2PB10Xhap12_2397	3	1217	Insertion	49342706	49343923	1100	Het_Var	8	8	1	100	5+	90-100	Het_Var	11	13	0.846154	84.6154	Threshold2	Het_Var	Het_Var	11	11	1	100	concordant	HG2_PB_SVrefine2PB10Xhap12_2397.jpeg	Het_Var	5+	90-100	concordant	concordant	v0.6_Call	INS 3:49342706-49343923	INS	1000-5999	Het_Var
HG2_PB_SVrefine2PBcRplusDovetail_11406	9	1251	Insertion	817447	818698	1128	Het_Var	3	3	1	100	2018-03-04	90-100	Het_Var	4	4	1	100	Threshold2	Het_Var	Het_Var	4	4	1	100	concordant	HG2_PB_SVrefine2PBcRplusDovetail_11406.jpeg	Het_Var	2018-03-04	90-100	concordant	concordant	v0.6_Call	INS 9:817447-818698	INS	1000-5999	Het_Var
HG3_PB_SVrefine2PBcRDovetail_3678	7	1672	Insertion	27804641	27806313	143	Hom_Var	5	5	1	100	5+	90-100	Hom_Var	12	12	1	100	Threshold2	Hom_Var	Hom_Var	9	9	1	100	concordant	HG3_PB_SVrefine2PBcRDovetail_3678.jpeg	Hom_Var	5+	90-100	concordant	concordant	v0.6_Call	INS 7:27804641-27806313	INS	1000-5999	Hom_Var
HG4_Ill_GATKHCSBGrefine_11290	17	1365	Insertion	18916910	18918275	868	Hom_Var	6	6	1	100	5+	90-100	Hom_Var	10	10	1	100	Threshold2	Hom_Var	Hom_Var	10	10	1	100	concordant	HG4_Ill_GATKHCSBGrefine_11290.jpeg	Hom_Var	5+	90-100	concordant	concordant	v0.6_Call	INS 17:18916910-18918275	INS	1000-5999	Hom_Var
HG2_PB_SVrefine2PBcRplusDovetail_8187	4	4005	Insertion	76674935	76678940	1103	Hom_Var	5	5	1	100	5+	90-100	Hom_Var	9	9	1	100	Threshold2	Hom_Var	Hom_Var	9	9	1	100	concordant	HG2_PB_SVrefine2PBcRplusDovetail_8187.jpeg	Hom_Var	5+	90-100	concordant	concordant	v0.6_Call	INS 4:76674935-76678940	INS	1000-5999	Hom_Var
HG3_PB_SVrefine2Falcon1Dovetail_1100	2	3282	Insertion	26556298	26559580	1104	Hom_Var	8	8	1	100	5+	90-100	Hom_Var	10	11	0.909091	90.9091	Threshold2	Hom_Var	Hom_Var	10	10	1	100	concordant	HG3_PB_SVrefine2Falcon1Dovetail_1100.jpeg	Hom_Var	5+	90-100	concordant	concordant	v0.6_Call	INS 2:26556298-26559580	INS	1000-5999	Hom_Var
HG4_PB_SVrefine2PBcRDovetail_963	2	1269	Insertion	32046160	32047429	1275	Hom_Var	7	7	1	100	5+	90-100	Hom_Var	12	12	1	100	Threshold2	Hom_Var	Hom_Var	11	11	1	100	concordant	HG4_PB_SVrefine2PBcRDovetail_963.jpeg	Hom_Var	5+	90-100	concordant	concordant	v0.6_Call	INS 2:32046160-32047429	INS	1000-5999	Hom_Var
HG2_Ill_Spiral_851	11	195	Insertion	58165360	58165555	252	Het_Var	8	8	1	100	5+	90-100	Het_Var	11	11	1	100	Threshold2	Het_Var	Het_Var	11	11	1	100	concordant	HG2_Ill_Spiral_851.jpeg	Het_Var	5+	90-100	concordant	concordant	v0.6_Call	INS 11:58165360-58165555	INS	100-300	Het_Var
HG3_Ill_GATKHCSBGrefine_1593	2	135	Insertion	166888716	166888851	478	Het_Var	8	8	1	100	5+	90-100	Het_Var	13	14	0.928571	92.8571	Threshold2	Het_Var	Het_Var	13	13	1	100	concordant	HG3_Ill_GATKHCSBGrefine_1593.jpeg	Het_Var	5+	90-100	concordant	concordant	v0.6_Call	INS 2:166888716-166888851	INS	100-300	Het_Var
HG3_Ill_manta_2154	8	113	Insertion	25912374	25912487	631	Het_Var	8	8	1	100	5+	90-100	Het_Var	14	15	0.933333	93.3333	Threshold2	Het_Var	Het_Var	13	13	1	100	concordant	HG3_Ill_manta_2154.jpeg	Het_Var	5+	90-100	concordant	concordant	v0.6_Call	INS 8:25912374-25912487	INS	100-300	Het_Var
HG4_PB_assemblyticsfalcon_26393	8	300	Insertion	122731008	122731308	922	Het_Var	7	7	1	100	5+	90-100	Het_Var	12	13	0.923077	92.3077	Threshold2	Het_Var	Het_Var	12	12	1	100	concordant	HG4_PB_assemblyticsfalcon_26393.jpeg	Het_Var	5+	90-100	concordant	concordant	v0.6_Call	INS 8:122731008-122731308	INS	100-300	Het_Var
HG2_Ill_GATKHCSBGrefine_7770	10	175	Insertion	93500788	93500963	982	Het_Var	9	9	1	100	5+	90-100	Het_Var	14	14	1	100	Threshold2	Het_Var	Het_Var	13	13	1	100	concordant	HG2_Ill_GATKHCSBGrefine_7770.jpeg	Het_Var	5+	90-100	concordant	concordant	v0.6_Call	INS 10:93500788-93500963	INS	100-300	Het_Var
HG2_Ill_MetaSV_158	1	204	Insertion	81660350	81660554	1282	Het_Var	9	9	1	100	5+	90-100	Het_Var	13	14	0.928571	92.8571	Threshold2	Het_Var	Het_Var	13	13	1	100	concordant	HG2_Ill_MetaSV_158.jpeg	Het_Var	5+	90-100	concordant	concordant	v0.6_Call	INS 1:81660350-81660554	INS	100-300	Het_Var
HG2_PB_SVrefine2PB10Xhap12_750	1	275	Insertion	165659304	165659579	47	Hom_Var	9	9	1	100	5+	90-100	Hom_Var	16	17	0.941176	94.1176	Threshold2	Hom_Var	Hom_Var	15	15	1	100	concordant	HG2_PB_SVrefine2PB10Xhap12_750.jpeg	Hom_Var	5+	90-100	concordant	concordant	v0.6_Call	INS 1:165659304-165659579	INS	100-300	Hom_Var
HG4_PB_pbsv_14472	13	123	Insertion	113299703	113299826	133	Hom_Var	4	4	1	100	2018-03-04	90-100	Hom_Var	6	6	1	100	Threshold2	Hom_Var	Hom_Var	6	6	1	100	concordant	HG4_PB_pbsv_14472.jpeg	Hom_Var	5+	90-100	concordant	concordant	v0.6_Call	INS 13:113299703-113299826	INS	100-300	Hom_Var
HG2_PB_SVrefine2PB10Xhap12_8621	11	136	Insertion	696767	696903	271	Hom_Var	6	6	1	100	5+	90-100	Hom_Var	10	10	1	100	Threshold2	Hom_Var	Hom_Var	10	10	1	100	concordant	HG2_PB_SVrefine2PB10Xhap12_8621.jpeg	Hom_Var	5+	90-100	concordant	concordant	v0.6_Call	INS 11:696767-696903	INS	100-300	Hom_Var
HG3_PB_assemblyticsfalcon_27617	9	159	Insertion	38750739	38750898	636	Hom_Var	6	6	1	100	5+	90-100	Hom_Var	8	8	1	100	Threshold2	Hom_Var	Hom_Var	8	8	1	100	concordant	HG3_PB_assemblyticsfalcon_27617.jpeg	Hom_Var	5+	90-100	concordant	concordant	v0.6_Call	INS 9:38750739-38750898	INS	100-300	Hom_Var
HG2_PB_assemblyticsfalcon_19552	4	289	Insertion	67963880	67964169	1035	Hom_Var	8	8	1	100	5+	90-100	Hom_Var	14	14	1	100	Threshold2	Hom_Var	Hom_Var	12	12	1	100	concordant	HG2_PB_assemblyticsfalcon_19552.jpeg	Hom_Var	5+	90-100	concordant	concordant	v0.6_Call	INS 4:67963880-67964169	INS	100-300	Hom_Var
HG3_PB_pbsv_16248	17	167	Insertion	10138714	10138881	1232	Hom_Var	6	6	1	100	5+	90-100	Hom_Var	11	11	1	100	Threshold2	Hom_Var	Hom_Var	10	10	1	100	concordant	HG3_PB_pbsv_16248.jpeg	Hom_Var	5+	90-100	concordant	concordant	v0.6_Call	INS 17:10138714-10138881	INS	100-300	Hom_Var
HG2_PB_SVrefine2PBcRplusDovetail_3764	16	288	Insertion	232689	232977	1268	Hom_Var	8	8	1	100	5+	90-100	Hom_Var	13	13	1	100	Threshold2	Hom_Var	Hom_Var	13	13	1	100	concordant	HG2_PB_SVrefine2PBcRplusDovetail_3764.jpeg	Hom_Var	5+	90-100	concordant	concordant	v0.6_Call	INS 16:232689-232977	INS	100-300	Hom_Var
